# Supplementary material for: The Peruvian oxygen minimum zone was similar in extent but weaker during the Last Glacial Maximum than Late Holocene
Source: Springer Nature journal article supplement (doi:10.1038/s43247-022-00635-y), 2022-12-05
Supplement: MOESM1 [file 43247_2022_635_MOESM1_ESM.pdf]

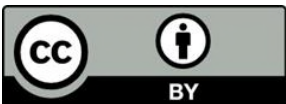

**Open Access** This file is licensed under a Creative Commons Attribution 4.0 International License, which permits use, sharing, adaptation, distribution and reproduction in any medium or format, as long as you give appropriate credit to the original author(s) and the source, provide a link to the Creative Commons license, and indicate if changes were made. In the cases where the authors are anonymous, such as is the case for the reports of anonymous peer reviewers, author attribution should be to 'Anonymous Referee' followed by a clear attribution to the source work. The images or other third party material in this file are included in the article's Creative Commons license, unless indicated otherwise in a credit line to the material. If material is not included in the article's Creative Commons license and your intended use is not permitted by statutory regulation or exceeds the permitted use, you will need to obtain permission directly from the copyright holder. To view a copy of this license, visit <http://creativecommons.org/licenses/by/4.0/>.

*Web links to the author's journal account have been redacted from the decision letters as indicated to maintain confidentiality*

14th Sep 22

Dear Dr Glock,

Your manuscript titled "Foraminiferal pore densities reveal similar but weaker Peruvian oxygen minimum zone during Last Glacial Maximum" has now been seen by 3 reviewers, and I include their comments at the end of this message. They find your work of interest, but some important points are raised. We are interested in the possibility of publishing your study in Communications Earth & Environment, but would like to consider your responses to these concerns and assess a revised manuscript before we make a final decision on publication.

Specifically, for publication in Communications Earth & Environment to be appropriate, we will need you to:

- 1) Place your findings firmly in the context of other relevant work on the evolution of the deglacial oxygen minimum zone on the Pacific margin
- 2) Ensure your approach is clearly justified and explained so that your results are fully reproducible (please note that we allow unlimited room for methods).

We therefore invite you to revise and resubmit your manuscript, along with a point-by-point response that takes into account the points raised. Please highlight all changes in the manuscript text file.

We are committed to providing a fair and constructive peer-review process. Please don't hesitate to contact us if you wish to discuss the revision in more detail.

Please use the following link to submit your revised manuscript, point-by-point response to the referees' comments (which should be in a separate document to any cover letter) and the completed checklist:

[link redacted]

**\*\* This url links to your confidential home page and associated information about manuscripts you may have submitted or be reviewing for us. If you wish to forward this email to co-authors, please delete the link to your homepage first \*\***

We hope to receive your revised paper within six weeks; please let us know if you aren't able to submit it within this time so that we can discuss how best to proceed. If we don't hear from you, and the revision process takes significantly longer, we may close your file. In this event, we will still be happy to reconsider your paper at a later date, as long as nothing similar has been accepted for publication at Communications Earth & Environment or published elsewhere in the meantime.

We understand that due to the current global situation, the time required for revision may be longer than usual. We would appreciate it if you could keep us informed about an estimated timescale for resubmission, to facilitate our planning. Of course, if you are unable to estimate, we are happy to accommodate necessary extensions nevertheless.

Please do not hesitate to contact me if you have any questions or would like to discuss these revisions further. We look forward to seeing the revised manuscript and thank you for the opportunity to review your work.

Best regards,

Alienor Lavergne, PhD  
Associate Editor  
Communications Earth & Environment

## EDITORIAL POLICIES AND FORMATTING

We ask that you ensure your manuscript complies with our editorial policies. Please ensure that the following formatting requirements are met, and any checklist relevant to your research is completed and uploaded as a Related Manuscript file type with the revised article.

Editorial Policy: [Policy requirements](https://www.nature.com/documents/nr-editorial-policy-checklist.pdf) (Download the link to your computer as a PDF.)

Furthermore, please align your manuscript with our format requirements, which are summarized on the following checklist:

[Communications Earth & Environment formatting checklist](https://www.nature.com/documents/commsj-phys-style-formatting-checklist-article.pdf)

and also in our style and formatting guide [Communications Earth & Environment formatting guide](https://www.nature.com/documents/commsj-phys-style-formatting-guide-accept.pdf) .

**\*\*\* DATA:** Communications Earth & Environment endorses the principles of the Enabling FAIR data project (<http://www.copdess.org/enabling-fair-data-project/>). We ask authors to make the data that support their conclusions available in permanent, publically accessible data repositories. (Please contact the editor if you are unable to make your data available).

All Communications Earth & Environment manuscripts must include a section titled "Data Availability" at the end of the Methods section or main text (if no Methods). More information on this policy, is available at <http://www.nature.com/authors/policies/data/data-availability-statements-data-citations.pdf>.

In particular, the Data availability statement should include:

- Unique identifiers (such as DOIs and hyperlinks for datasets in public repositories)
- Accession codes where appropriate
- If applicable, a statement regarding data available with restrictions

- If a dataset has a Digital Object Identifier (DOI) as its unique identifier, we strongly encourage including this in the Reference list and citing the dataset in the Data Availability Statement.

DATA SOURCES: All new data associated with the paper should be placed in a persistent repository where they can be freely and enduringly accessed. We recommend submitting the data to discipline-specific, community-recognized repositories, where possible and a list of recommended repositories is provided at <http://www.nature.com/sdata/policies/repositories>.

If a community resource is unavailable, data can be submitted to generalist repositories such as [figshare](https://figshare.com/) or [Dryad Digital Repository](http://datadryad.org/). Please provide a unique identifier for the data (for example a DOI or a permanent URL) in the data availability statement, if possible. If the repository does not provide identifiers, we encourage authors to supply the search terms that will return the data. For data that have been obtained from publically available sources, please provide a URL and the specific data product name in the data availability statement. Data with a DOI should be further cited in the methods reference section.

Please refer to our data policies at <http://www.nature.com/authors/policies/availability.html>.

#### REVIEWER COMMENTS:

Reviewer #1 (Remarks to the Author):

The manuscript by Glock et al., aims to reconstruct shallow-intermediate water (~500 m) oxygenation in the Peruvian OMZ during time slices from the LGM and Late Holocene (LH). They first present several new calibrations of the pore density oxygen proxy for the foraminifer *limbata* from the Peruvian margin. These are compared and then applied to reconstruct oxygenation in the region. By combining this new data with previously published neighboring records the authors are able to convincingly show a present but weakened OMZ along the Peruvian margin in the LGM as compared to the LH. The manuscript is well-written and well-constructed. I could see the newly presented calibration being used in similar studies and the findings contribute to an important and rapidly evolving discussion of deglacial OMZ evolution on the Pacific margin.

My only major comment is in regards to the difference in inferred shape of the OMZ at present as compared to the LH (just 1-0 kya!). This is seen most clearly in Figure 6 and commented upon on lines 294-296. The difference in oxygenation and slope of the lower oxycline between the recent sedimentary and modern observational records is striking. Could this be elaborated upon? Is this indicative of very recent increases in oxygenation of deep-intermediate waters? Or something else? The difference between LH and modern

oxygenation may also raise some skepticism around how reliable modern [O<sub>2</sub>]BW measurements may be for calibrating “recent” coretop material, which should be addressed.

Other comments are as below:

15: “a proxy”

27: no “the”

30: no “the”

37: Given the importance of deeper water masses to this story, could intermediate water hydrography be added here as well?

55-57: This requires a reference

60: to -> too

63-64: “had been assumed that”

66-68: “depend” doesn’t seem quite the right word given this is just the observation of individuals at higher O<sub>2</sub>. Could this be rephrased?

68: Is there any information available on the ecology on limbate for comparison?

69: remove comma

70: as well -> also AND remove comma

71: at -> in

75: remove comma

76: What is the rationale behind developing a local calibration? If the relationship between PD and O<sub>2</sub> is highly spatially variable, would this relationship not also be expected to vary through time?

86: “samples contained”

87: “model for core”

86 & 89 & throughout: check for consistency in “planktic” and “planktonic”

224: Is it so destructive that shells could not be used even for geochemical analyses?

229: “elaboration” isn’t quite right. “test of”?

272: “concentration of preformed”

278: “change in”

307-308: Could this be elaborated upon? I am struggling to understand how this observation connects with seasonality. Is the suggestion that limbata are living preferentially in higher O<sub>2</sub> seasons? If so, why would this impact only part of the record? Clarification would be helpful. Figure 5: This figure would be more legible with some of the white space between intervals removed and data expanded horizontally. I’d recommend removing ~4-15 kyr from the x axis and replacing with a clearly visible axis break. Alternately, the two intervals could be shown in adjacent panels with a shared y axis.

Reviewer #2 (Remarks to the Author):

The study investigates the possible use of foraminifera pore density as proxy for bottom water oxygen concentration during LGM and late Holocene in the Peruvian OMZ region. Oxygen past reconstruction is crucial in the current context of global oceanic deoxygenation. The authors compare different methodologies to measure the pore density on the shell of foraminifera specimens using an optic microscope. Then, they calibrate modern bottom water oxygen concentrations with pore density of modern specimens from different locations along an oxygen concentration gradient. Using long sediment records on which age

models were determined, the authors reconstruct the past bottom water oxygen concentrations using pore density of foraminifera shell following the former calibration. Results are coherent with other studies investigating past oxygen concentrations in the bottom water in this region (but at other periods), arguing for a decrease in oxygenation between LGM and late Holocene. Authors then explore the reasons for this decrease, contrasting with other oceanic regions.

I found the manuscript clear, straightforward, and well written. I think that data acquisition and statistical treatment procedures are suited for the purpose of the study, and that the study is a significant advancement in the field of past oxygen concentrations reconstruction. This work will be of interest for the community interested in foraminifera and their use as proxy, but also to all researchers interested in past climate reconstruction. For these reasons, I think this work is worth publishing in *Communications Earth & Environment*.

I have few comments and suggestions about the study, listed in detail below and also in the pdf file attached. Briefly, I suggest moving the first part of the section line 142 (“Downcore [O<sub>2</sub>]BW reconstruction using the pore density epifaunal *P. limbata*”) to the method section. I also suggest few ideas, but I let the author choose if it might be interesting or not to discuss it in their manuscript, especially about two things that could impact the proxy used:

- Shell thickness, which is greater in oldest chambers (if I am right?), hampering passive oxygen diffusion through pores. This questions the efficiency of oxygen uptake in the oldest chambers compared to the newest ones, and the benefit to include these chambers in the calculus of PD (for proxy purpose). Exclusion of the youngest chambers (done in method #4 if total area was higher than 700 000 μm<sup>2</sup>) that are usually the biggest ones and showing the highest porosity. Since they seem should play a major role in oxygen uptake, building a proxy ignoring them is questionable. On the other hand, I understand why the authors proceed this way: significant ontogenetic effect might be problematic in the calibration and further use of such proxy.

- The idea that foraminifera PD (and by extension porosity) tracks the lowest oxygen concentrations in the bottom water allowing individuals to survive instead of an “averaged” [O<sub>2</sub>]BW. This would argue in favour of the fact that bottom water oxygen concentrations at the Peruvian shelf have continued to decrease until today. However, this process might only be accurate if youngest chambers (the ones that theoretically represent the compromise between improving oxygen uptake by increasing porosity and assuring mechanic integrity of the shell by limiting porosity increase) are considered in the proxy calibration.

I would like to inform the editor that I am not comfortable with the age model determination since it is out of my field of expertise. For this reason, I cannot fully assess the quality of this part in the manuscript.

I recommend minor revisions for this manuscript since my suggestions and comments are not going against the interpretations of results and the conclusions of the study.

Because it is not double anonymised, I require my name to be attached to this review.

Julien Richirt

Comments and suggestions

Abstract

Line 16: “mbss” or “mbs” later in the manuscript on line 144, 250, 253, 254, 256, and Figure 1 caption line 550 & 646. Please if you mean something different precise it or homogenise the spelling.

Introduction

Lines 54-55: “species-specific” or “species specific”. Homogenise in the manuscript if needed. I think you mean that the responses of foraminifera to different environmental factors are species-specific. I am not sure you can say that environmental factors are species-specific. Reformulate please.

Lines 57-58: Please be more specific about what pore characteristic *B. spissa* adapt to nitrate concentrations.

Line 69: Please change “porosity” for “pore density” on line 69. If I understood correctly you test for pore density (PD, pore number per unit of surface) in your study, and not porosity (area covered occupied by pores in %) since you state line 181-183: “This is a good option for high resolution SEM images but our study is based on light micrographs that do not have a resolution allowing to accurately determine the pore area. Thus, we focused on the PD instead”. Please change accordingly through the manuscript, since depending on the species, pore density and porosity might be negatively correlated.

#### Methods

Lines 336-338: Is there a specific reason why you used this mesh size to sieve? How did you check that the specimens you used for the modern calibration (only the top layer of the small cores) were alive when you picked them and not dead or transported from elsewhere?

Lines 364-366: “Due to the low number of specimens in the depths 5.5 cm, 7 cm and 9 cm, we decided to pool the specimens to one datapoint in fig. 5.” What calibrated age did you choose for these specimens, an average of the 3 samples? Please specify in the text.

#### Results

I consider that lines 143-166 are rather method description than results. Consequently, this part should be moved to the Methods section.

Lines 138-141: You state “In addition, the variability of the PD after method #1 was very high at station M77/1-459/MUC-25, which had the highest [O<sub>2</sub>]BW and the uncertainties of the regressions are also relatively high (Fig. 4C).” For station M77/1-459/MUC-25, you measured 2 specimens only, which is too few to describe variability or uncertainty for a regression in my opinion. I suggest removing this statement since the highest correlation (coupled with its significance) for method #4 using all specimens from all stations is convincing enough that this is the method to use in your case.

Lines 145-147: You state “Since method #4 showed the best correlation between PD and [O<sub>2</sub>]BW, we mainly used this method for the downcore reconstructions.” Later in the manuscript you state on lines 379-380 “All four methods have been applied to the core top samples and only method #4 was used for the downcore PD analyses in M77/1 416-GC4 and M77/1 406-MUC6.” Please precise if you mainly or only used the method #4 for downcore reconstructions.

Line 168: If this is equivalent to a Welch’s T test, then change “heteroscedastic Student’s T-test” by “Welch’s T-test”.

#### Discussion

Line 236: Change “porosity” by “pore density” please.

Lines 268-270: I have difficulties to understand this sentence. Is it the lower Fe burial that is due to a decrease in sediment deposition and increased erosion? Please rephrase more clearly.



Lines 266-267: unclear: is oxygen concentrations higher in intermediate water masses?

Lines 271-272: "pre-formed" or "preformed", homogenise spelling.

Lines 307-308: "This might be related to seasonality in the life cycle of *P. limbata*." In what way? Could it be also related to a possible different respiration pathway in this species?

Below a certain oxygen concentration, the species might shift to alternative electron acceptor (nitrate for example?). Additionally, could oxygen uptake through pseudopods occur when they are extruded? Could this represent an active and easy way for foraminifera to finely adjust their ability to uptake oxygen.

Lines 308-310: "Another explanation for this phenomenon could be an observation that bottom waters at the Peruvian shelf became more oxygenated over the last ~100 yr."

Alternatively:

- If we assume that PD is related to oxygen content with a negative correlation.

- Increasing PD is assumed to be an adaptation to better cope with low oxygen concentration.

This means that foraminifera adapt their PD regarding the lowest oxygen concentrations they have to cope with (why would they increase PD further if not needed?).

- This implies that PD might be correlated with the lowest oxygen concentrations specimens are exposed to, instead of an average oxygen concentration value (kind of threshold effect, below this value of oxygen concentration the foraminifera cannot cope, above -during pulses- it can survive).

- The modern lowest oxygen concentrations recorded are about 1  $\mu\text{mol/kg}$  in the region. This value is below the oxygen concentration values indicated by the proxy using foraminiferal PD. This would argue for a continuous decrease of the lowest oxygen concentrations occurring in the region during LH.

References

Line 445: correct ref. 28

Figures & Tables

Line 574, 583 and 623: I was confused by the use of SEM acronym for 2 different things (Standard Error of the Mean and Scanning Electron Microscope lines 181, 345 and 347). I suggest changing one of the 2 acronyms to avoid confusion for the reader.

Figure 1: I suspect the black square in the top right panel to be a little shifted north compared to the biggest map panel

Figure 5: in the caption you state "Since only two specimens were found in one sample each individual reconstructed [O<sub>2</sub>]BW instead of mean values were plotted as grey crosses." It is unclear, which sample?

On the figure itself: I suggest making a discontinuous x axis by removing the period between 4 and 14 kyr BP. It would make the data easier to read and avoid a figure where 70% is blank. Alternatively, I understand that the authors made the choice to keep continuous x axis to keep time scale coherent for the reader.

Reviewer #3 (Remarks to the Author):

Glock et al evaluate and expand upon the foraminiferal pore-density oxygenation proxy and apply it back in time to a core collected from the Peruvian margin. It can often be difficult to unravel the effects of productivity and oxygenation on our traditional oxygenation proxies, yet records of oxygenation can give us key insight on past changes in deep-ocean respired carbon storage and shallow-ocean OMZ expansion. However, we tend to have few studies that actually take the time to evaluate and improve upon our methods in a clear and practical way as was done in this study. This study is a great introduction to the pore-density proxy that will be of immense value to others who would like to apply this proxy to their own research areas.

I have no major issues with the methods or results in this study, but I think it could use some revision for clarity and some expanded discussion. As I was reading, it felt like I sometimes had to go back and forth to different sections in the paper because parts of one idea were split across sections resulting in things being repeated in some spots and left out of others. It would help to bring these ideas together in one place. Specifically, I noticed this when it came to an explanation of the different pore density methods. The methods are described in the results, the discussion, and again in the methods section. It would clarify things if you bring these different pieces together in one section focused on describing in detail the four different methods. I think this portion of the paper is extremely valuable, and if we want to get more people to try out these methods and apply this proxy then you want to make it as easy to follow as possible.

Here's my suggestion for reorganizing the PD methods (take it or leave it). Before the section you have comparing the four different methods add a section describing the four pore density methods in detail (include figure 3), the pros and cons of each method, how to do the method, the practicalities etc. Move the methodological recommendations you have later in the paper up to this section. You could also add an additional summary chart of the pros and cons of each method, that would be a great way to reinforce the info quickly and clearly. I also think your current description of methodological recommendations can probably be edited down a bit, it starts to get a bit verbose in some spots. This might be a great section to take advantage of things like bullet points or numbering or charts to show the information more clearly.

I really enjoyed reading your core stratigraphy section. You were working with very challenging core material but did a great job breaking down each of the challenges you faced and explaining how you tackled those challenges and the caveats that come with dealing with imperfect core material. One small thought about your stratigraphic methods- Could you use the reservoir ages from the peru-chile transect of Martínez-Fontaine et al. (2019) rather than Bova et al? Or are they perhaps less suitable? Either way this is nothing that would affect your results, I was just curious why you chose the reservoir ages that you chose. I found this section to be very well researched and explained.

The downcore O<sub>2</sub> reconstruction section seems to be a mix of methods and results, it might be worth splitting these up a bit.

The section on deoxygenation reads a bit like a results section with some added literature review, but I would have liked to see more discussion in this section. The other sections have

proven your expertise, so when I got to this section I was eager to hear more about why these results are interesting and important. Expand upon the big-picture implications of a well oxygenated glacial eastern tropical Pacific.

Methods: How many forams do you use for each sample? What is a good representative number?

Table 1: It was a bit hard to tell which names were italicized. Maybe draw a line between the coretops and long cores?

Tables 2-4 could maybe be shifted to supplemental information.

Figure 1: Add the location of the bova core to the inset map

Figure 2: It might be worth expanding the x-axis on the top figure to match the bottom figure. The error initially looks a bit alarming compared to the lower figure, but it's just a function of the axes.

Figure 4: Add the species to the legend in A. Add labels to the photographs in B to indicate the high and low PD specimens. Shouldn't oxygen go on the x-axis because it's the independent variable? Also, why is the error on the >12  $\mu\text{mol}/\text{kg}$  method 1 PD so high?

The study investigates the possible use of foraminifera pore density as proxy for bottom water oxygen concentration during LGM and late Holocene in the Peruvian OMZ region. Oxygen past reconstruction is crucial in the current context of global oceanic deoxygenation.

The authors compare different methodologies to measure the pore density on the shell of foraminifera specimens using an optic microscope. Then, they calibrate modern bottom water oxygen concentrations with pore density of modern specimens from different locations along an oxygen concentration gradient. Using long sediment records on which age models were determined, the authors reconstruct the past bottom water oxygen concentrations using pore density of foraminifera shell following the former calibration. Results are coherent with other studies investigating past oxygen concentrations in the bottom water in this region (but at other periods), arguing for a decrease in oxygenation between LGM and late Holocene. Authors then explore the reasons for this decrease, contrasting with other oceanic regions.

I found the manuscript clear, straightforward, and well written. I think that data acquisition and statistical treatment procedures are suited for the purpose of the study, and that the study is a significant advancement in the field of past oxygen concentrations reconstruction. This work will be of interest for the community interested in foraminifera and their use as proxy, but also to all researchers interested in past climate reconstruction. For these reasons, I think this work is worth publishing in *Communications Earth & Environment*.

I have few comments and suggestions about the study, listed in detail below and also in the pdf file attached. Briefly, I suggest moving the first part of the section line 142 (“Downcore  $[O_2]_{BW}$  reconstruction using the pore density epifaunal *P. limbata*”) to the method section. I also suggest few ideas, but I let the author choose if it might be interesting or not to discuss it in their manuscript, especially about two things that could impact the proxy used:

- Shell thickness, which is greater in oldest chambers (if I am right?), hampering passive oxygen diffusion through pores. This questions the efficiency of oxygen uptake in the oldest chambers compared to the newest ones, and the benefit to include these chambers in the calculus of PD (for proxy purpose). Exclusion of the youngest chambers (done in method #4 if total area was higher than  $700\,000\ \mu\text{m}^2$ ) that are usually the biggest ones and showing the highest porosity. Since they seem should play a major role in oxygen uptake, building a proxy ignoring them is questionable. On the other hand, I understand why the authors proceed this way: significant ontogenetic effect might be problematic in the calibration and further use of such proxy.
- The idea that foraminifera PD (and by extension porosity) tracks the lowest oxygen concentrations in the bottom water allowing individuals to survive instead of an “averaged”  $[O_2]_{BW}$ . This would argue in favour of the fact that bottom water oxygen concentrations at the Peruvian shelf have continued to decrease until today. However, this process might only be accurate if youngest chambers (the ones that theoretically represent the compromise between improving oxygen uptake by increasing porosity and assuring mechanic integrity of the shell by limiting porosity increase) are considered in the proxy calibration.

I would like to inform the editor that I am not comfortable with the age model determination since it is out of my field of expertise. For this reason, I cannot fully assess the quality of this part in the manuscript.

I recommend minor revisions for this manuscript since my suggestions and comments are not going against the interpretations of results and the conclusions of the study.

Because it is not double anonymised, I require my name to be attached to this review.

Julien Richirt

## Comments and suggestions

### Abstract

Line 16: “mbss” or “mbs” later in the manuscript on line 144, 250, 253, 254, 256, and Figure 1 caption line 550 & 646. Please if you mean something different precise it or homogenise the spelling.

### Introduction

Lines 54-55: “species-specific” or “species specific”. Homogenise in the manuscript if needed. I think you mean that the responses of foraminifera to different environmental factors are species-specific. I am not sure you can say that environmental factors are species-specific. Reformulate please.

Lines 57-58: Please be more specific about what pore characteristic *B. spissa* adapt to nitrate concentrations.

Line 69: Please change “porosity” for “pore density” on line 69. If I understood correctly you test for pore density (PD, pore number per unit of surface) in your study, and not porosity (area covered occupied by pores in %) since you state line 181-183: “*This is a good option for high resolution SEM images but our study is based on light micrographs that do not have a resolution allowing to accurately determine the pore area. Thus, we focused on the PD instead*”. Please change accordingly through the manuscript, since depending on the species, pore density and porosity might be negatively correlated.

### Methods

Lines 336-338: Is there a specific reason why you used this mesh size to sieve? How did you check that the specimens you used for the modern calibration (only the top layer of the small cores) were alive when you picked them and not dead or transported from elsewhere?

Lines 364-366: “*Due to the low number of specimens in the depths 5.5 cm, 7 cm and 9 cm, we decided to pool the specimens to one datapoint in fig. 5.*” What calibrated age did you choose for these specimens, an average of the 3 samples? Please specify in the text.

### Results

I consider that lines 143-166 are rather method description than results. Consequently, this part should be moved to the Methods section.

Lines 138-141: You state “*In addition, the variability of the PD after method #1 was very high at station M77/1-459/MUC-25, which had the highest [O<sub>2</sub>]BW and the uncertainties of the regressions are also relatively high (Fig. 4C).*” For station M77/1-459/MUC-25, you measured 2 specimens only, which is too few to describe variability or uncertainty for a regression in my opinion. I suggest removing this statement since the highest correlation (coupled with its significance) for method #4 using all specimens from all stations is convincing enough that this is the method to use in your case.

Lines 145-147: You state “*Since method #4 showed the best correlation between PD and [O<sub>2</sub>]BW, we mainly used this method for the downcore reconstructions.*” Later in the manuscript you state on lines 379-380 “*All four methods have been applied to the core top samples and only method #4 was used for the downcore PD analyses in M77/1 416-GC4 and M77/1 406-MUC6.*” Please precise if you mainly or only used the method #4 for downcore reconstructions.

Line 168: If this is equivalent to a Welch’s T test, then change “*heteroscedastic Student’s T-test*” by “*Welch’s T-test*”.

## **Discussion**

Line 236: Change “porosity” by “pore density” please.

Lines 268-270: I have difficulties to understand this sentence. Is it the lower Fe burial that is due to a decrease in sediment deposition and increased erosion? Please rephrase more clearly.

Lines 266-267: unclear: is oxygen concentrations higher in intermediate water masses?

Lines 271-272: “*pre-formed*” or “*preformed*”, homogenise spelling.

Lines 307-308: “*This might be related to seasonality in the life cycle of P. limbata.*” In what way? Could it be also related to a possible different respiration pathway in this species? Below a certain oxygen concentration, the species might shift to alternative electron acceptor (nitrate for example?). Additionally, could oxygen uptake through pseudopods occur when they are extruded? Could this represent an active and easy way for foraminifera to finely adjust their ability to uptake oxygen.

Lines 308-310: “*Another explanation for this phenomenon could be an observation that bottom waters at the Peruvian shelf became more oxygenated over the last ~100 yr.*”

Alternatively:

- If we assume that PD is related to oxygen content with a negative correlation.

- Increasing PD is assumed to be an adaptation to better cope with low oxygen concentration.

This means that foraminifera adapt their PD regarding the lowest oxygen concentrations they have to cope with (why would they increase PD further if not needed?).

- This implies that PD might be correlated with the lowest oxygen concentrations specimens are exposed to, instead of an average oxygen concentration value (kind of threshold effect, below this value of oxygen concentration the foraminifera cannot cope, above -during pulses- it can survive).

- The modern lowest oxygen concentrations recorded are about 1  $\mu\text{mol/kg}$  in the region. This value is below the oxygen concentration values indicated by the proxy using foraminiferal PD.

This would argue for a continuous decrease of the lowest oxygen concentrations occurring in the region during LH.

## **References**

Line 445: correct ref. 28

## **Figures & Tables**

Line 574, 583 and 623: I was confused by the use of SEM acronym for 2 different things (Standard Error of the Mean and Scanning Electron Microscope lines 181, 345 and 347). I suggest changing one of the 2 acronyms to avoid confusion for the reader.

Figure 1: I suspect the black square in the top right panel to be a little shifted north compared to the biggest map panel

Figure 5: in the caption you state “*Since only two specimens were found in one sample each individual reconstructed [O<sub>2</sub>]BW instead of mean values were plotted as grey crosses.*” It is unclear, which sample?

On the figure itself: I suggest making a discontinuous x axis by removing the period between 4 and 14 kyr BP. It would make the data easier to read and avoid a figure where 70% is blank. Alternatively, I understand that the authors made the choice to keep continuous x axis to keep time scale coherent for the reader.

# 1 Foraminiferal pore densities reveal similar but weaker Peruvian oxygen minimum zone 2 during Last Glacial Maximum

3 Nicolaas Glock<sup>1,\*</sup>, Zeynep Erdem<sup>2</sup>, Joachim Schönfeld<sup>3</sup>

4 <sup>1</sup>: Institute for Geology, University of Hamburg, Bundesstraße 55, 20146 Hamburg, Germany

5 <sup>2</sup>: NIOZ Royal Netherlands Institute for Sea Research and Utrecht University, Landsdiep 4,  
6 1797 SZ 't Horntje (Texel), The Netherlands

7 <sup>3</sup>: GEOMAR Helmholtz Centre for Ocean Research Kiel, Wischhofstrasse 1-3, 24148 Kiel,  
8 Germany

9 \*: Correspondence to N. Glock (nicolaas.glock@uni-hamburg.de)

## 10 Abstract

11 Ongoing ocean deoxygenation is a severe problem, mainly caused by decreased oxygen (O<sub>2</sub>)  
12 solubility due to climate warming and eutrophication in coastal environments. Quantitative  
13 reconstructions to understand past O<sub>2</sub> variability are thus highly desirable. In this study, we  
14 calibrated the pore density (PD) of the epibenthic foraminifer *Planulina limbata* from the  
15 Peruvian OMZ as proxy for bottom water O<sub>2</sub> concentrations ([O<sub>2</sub>]<sub>BW</sub>). This calibration was used  
16 to reconstruct [O<sub>2</sub>]<sub>BW</sub> at 17.5°S ~500 mbss during the Last Glacial Maximum (LGM) and the  
17 Late Holocene (LH). We found a deoxygenation of ~40% from ~11.1 (LGM) to 6.7 μmol/kg  
18 (LH). A comparison with other [O<sub>2</sub>] reconstructions at the Peruvian OMZ reveals a shallow  
19 OMZ during the LGM that was similar but weaker than during the LH. Increased glacial [O<sub>2</sub>]  
20 are likely related to lower temperatures (higher O<sub>2</sub> solubility), decreased nutrient and increased  
21 oxygen supply by source waters, and a decrease in coastal upwelling.

## 22 Introduction

23 Ongoing ocean deoxygenation and the expansion of tropical oxygen minimum zones (OMZs)  
24 due to a combination of climate warming and anthropogenic fertilization became a challenging  
25 task for contemporary earth science<sup>1,2</sup>. The Peruvian OMZ in the Eastern Tropical South Pacific  
26 is one of the most distinctive regions of oxygen (O<sub>2</sub>) depletion in the world's oceans and  
27 biogeochemical cycling within this region influences the global biogeochemistry. In particular,  
28 OMZs are major regions of reactive nitrogen loss by denitrification or anammox<sup>3</sup> and have a  
29 strong impact on global carbon cycling, since photosynthetic organisms bind atmospheric CO<sub>2</sub>  
30 near the water surface and the fixed carbon is transported into the deep via the downward flux  
31 of organic matter<sup>4</sup>. Vice versa dissolved CO<sub>2</sub> from deeper water masses is released to the  
32 atmosphere via upwelling<sup>4</sup>. The cold, upwelled deeper water masses warm up when they are  
33 transported to the water surface, which reduces the solubility of CO<sub>2</sub>. Bioproductivity in these  
34 regions therefore has a substantial influence on the CO<sub>2</sub> concentrations in the atmosphere. The  
35 hydrography at the Peruvian margin is dominated by the O<sub>2</sub> rich, equatorward Peru-Chile  
36 Current (flowing in depths between 0-100 m) and the O<sub>2</sub> deficient, nutrient-rich, poleward Peru-  
37 Chile undercurrent (flowing between ~100-350 m)<sup>5-10</sup>. Coastal upwelling off Peru is perennial  
38 and wind-driven<sup>8,11</sup>.

39 A quantitative assessment of pre-anthropogenic Peruvian OMZ extension and OMZ  
40 fluctuations between cold (glacial) and warm (interglacial) periods is still missing. There are  
41 only a few approaches of quantitative deglacial O<sub>2</sub> paleo reconstructions at the Peruvian OMZ  
42 so far, which are based on the variation of benthic foraminifera assemblages and redox sensitive  
43 elements in the sediments<sup>12,13</sup>. These studies indicated a decrease in bottom water O<sub>2</sub>  
44 concentrations of ~30 μmol/kg in intermediate depths (~1000 - 1250 m) of the northern OMZ

45 boundary<sup>12</sup> and a loss of 5-10  $\mu\text{mol/kg}$   $\text{O}_2$  at 240 m in the OMZ centre at 11°S<sup>13</sup> between the  
46 Last Glacial Maximum (LGM) and the Late Holocene (LH). This is equal to a loss of about  
47 50%  $\text{O}_2$  in intermediate water depths. The results are supported by other semi-quantitative redox  
48 proxies, such as the ratio of redox sensitive elements in the sediments (i.e. Mo/Re) and the  
49 variability of stable nitrogen (N) isotopes in sedimentary organic matter ( $\delta^{15}\text{N}_{\text{org}}$ ), both  
50 indicating  $\text{O}_2$  depletion over the last deglaciation<sup>14</sup>.

51 The porosity of epibenthic *Cibicides spp.* is an emerging foraminifera based quantitative  $\text{O}_2$   
52 proxy that has recently been calibrated<sup>15</sup>. Some deep dwelling planktic foraminifera also adapt  
53 their porosity to  $\text{O}_2$  variability<sup>16</sup>. Pore size and shape are conservative morphological features  
54 in evolution and species-specific<sup>17-19</sup>. In addition, the factors that influence the porosity of  
55 benthic foraminifera appear to be also species specific. While epifaunal *Cibicides spp.* likely  
56 require  $\text{O}_2$  for aerobic respiration they increase their porosity under  $\text{O}_2$  depletion to optimize  
57 the uptake of  $\text{O}_2$ . Some denitrifying foraminifera such as *Bolivina spissa* adapt their pore  
58 characteristics to the availability of nitrate ( $\text{NO}_3^-$ ) instead of  $\text{O}_2$  and can be used as quantitative  
59 proxy for bottom water  $\text{NO}_3^-$  concentration ( $[\text{NO}_3^-]_{\text{BW}}$ )<sup>20,21</sup>. Several species of benthic  
60 foraminifera are able to denitrify when  $\text{O}_2$  is depleted for respiration<sup>22-26</sup>. *B. spissa* belongs  
61 to a group of denitrifying species that prefer  $\text{NO}_3^-$  over  $\text{O}_2$  as an electron acceptor<sup>27</sup>. It is possible  
62 that some *Cibicides spp.* can switch to denitrification under  $\text{O}_2$  depletion, since they cluster next  
63 to the known denitrifying species within the phylogenetic tree<sup>28</sup>. It has been assumed for a while  
64 that *Cibicoides wuellerstoerfi* cannot survive longer  $\text{O}_2$  depletion<sup>29</sup>. However, Rathburn et  
65 al.<sup>15</sup> observed living *Cibicoides spp.* in environments of  $< 2 \mu\text{mol/kg}$   $[\text{O}_2]$ . In addition, fossil  
66 specimens have been found in paleorecords during periods of severe  $\text{O}_2$  depletion<sup>30</sup>. Though,  
67 *Cibicoides spp.* usually depend on  $\text{O}_2$ , since living specimens can be found in  $[\text{O}_2]$  of up to  
68 275  $\mu\text{mol/kg}$ <sup>15</sup>, even if some might be able to denitrify during periods of  $\text{O}_2$  depletion.

69 In this study we test, if the porosity of the epibenthic foraminifer *Planulina limbata* from the  
70 Peruvian OMZ might as well be used as a quantitative  $\text{O}_2$  proxy. We show, that the pore density  
71 (PD = number of pores/area) of *P. limbata* from core tops of five short sediment cores at the  
72 Peruvian OMZ is significantly correlated to  $[\text{O}_2]_{\text{BW}}$ . In addition, we test if the correlation  
73 between pore density and  $[\text{O}_2]_{\text{BW}}$  is better on the spiral or the umbilical side of the foraminiferal  
74 test. Furthermore, we compare the results of our calibration with the results for *Cibicides spp.*  
75 from Rathburn et al.<sup>15</sup>. This should evaluate, if this correlation can be used for other epifaunal  
76 species as well and a stacked global calibration is possible. Finally, we use our new local  
77 calibration to quantify the  $[\text{O}_2]_{\text{BW}}$  change between the LGM and the LH using sediment cores  
78 from the southern boundary of the Peruvian OMZ (17.5°S) and compile our record with other  
79 quantitative records from this region to assess the change in OMZ extension and strength  
80 between the LGM and the LH.

## 81 **Results**

### 82 **Core stratigraphy**

83 The age models of cores M77/1 416-GC4 and M77/1 406-MUC6 (locations see fig. 1 and tab.  
84 1) are mainly based on radiocarbon dating. In addition, the  $\delta^{18}\text{O}$  record has been used to exclude  
85 some samples from M77/1 406-MUC6 that were obviously located below a hiatus. None of the  
86 samples did contain a sufficient number of planktonic foraminifera for radiocarbon dating.  
87 Thus, the age model core M77/1 416-GC4 is completely based on radiocarbon ages of  
88 epibenthic *P. limbata* (Tab.2). There is an offset in radiocarbon ages between benthic and  
89 planktic foraminifera, based on the ventilation age of the near-bottom water and the marine



90 reservoir age (MRA) of the surface water, in which planktic foraminifera are dwelling (see  
91 review by Skinner and Bard<sup>31</sup>). To minimize this age uncertainty, we used the benthic-planktic  
92 radiocarbon age offset of the closest sediment core in literature that provided this data for our  
93 time slice of interest, which is CDH 26 (03°59.160S, 81°18.520W, 1023 m) from Bova et al.<sup>32</sup>.  
94 Since the location of CDH 26 is ~500 m deeper than M77/1 416-GC4, we assume that the  
95 ventilation age was likely a bit higher at CDH 26 resulting in a slight overestimation of our  
96 benthic-planktic offset. After the correction for the benthic-planktic radiocarbon age offset we  
97 did an additional MRA correction, using the MRA values for 18.75°S 75°W for the different  
98 time slices from the model output by Butzin et al.<sup>33,34</sup> (Suppl. Fig. 1). The radiocarbon ages of  
99 core M77/1 406-MUC6 that were measured on sedimentary organic matter were only MRA  
100 corrected using the model output by Butzin et al.<sup>33,34</sup> (Suppl. Fig. 1). The corrected radiocarbon  
101 dates were calibrated using Intcal20<sup>35</sup>. Age-depth models (Fig. 2) and sedimentation rates  
102 (Suppl. Fig. 2) for both cores were calculated, using the Bchron software package<sup>36</sup>. One outlier  
103 in core M77/1 416-GC4 that showed an age reversal at 290 cm depth was excluded for  
104 construction of the age depth model. The calibrated ages, as well as all the correction steps are  
105 summarized in table 2.

106 Both cores showed a distinct hiatus. The longer core M77/1 416-GC4 only covered the LGM  
107 from 17.5 to 24.1 cal. kyr BP. The Deglaciation and Holocene are missing. Benthic  $\delta^{18}\text{O}$  were  
108 relatively uniform along M77/1 416-GC4 and showed an offset of around ~1‰ compared to  
109 the top centimeters of M77/1 406-MUC6. One ‰ is a common offset between LGM and LH  
110 (see Suppl. Fig. 3). In core M77/1 406-MUC6 benthic  $\delta^{18}\text{O}$  shows an abrupt step to glacial  
111 values below 10 cm sediment depth and, in addition, there is a jump in the radiocarbon age in  
112 this part of the core (Tab. 2). Since these depths were obviously located below a hiatus, we  
113 ignored the PD data from this part of the core, since these foraminifera were not from the LH.  
114 We also excluded the elevated radiocarbon age of sedimentary organic matter at ~14 cm depth  
115 for the construction of our age-depth model. So, only the first 10 cm of M77/1 406-MUC6 were  
116 used for our paleo reconstructions, since they were from the LH. The sedimentation rates were  
117 much lower during the LH in comparison to the LGM (Suppl. Fig. 2). Both the hiatus and the  
118 low sedimentation rates during the LH are a typical phenomenon for this region in similar water  
119 depths. A widespread hiatus evolved in this region over the last deglaciation, likely erosion  
120 through high energetic non-linear internal waves<sup>37</sup>. Under modern conditions low  
121 sedimentation rates are common in water depths around 500 m at the Peruvian Margin because  
122 the internal waves hit the seafloor in these depths within a critical angle, which facilitates  
123 erosion<sup>38</sup>.

#### 124 **Comparison of four different methods to determine foraminiferal pore density**

125 Four different methods have been compared to determine the PD of *P. limbata* in the core top  
126 samples (locations see fig. 1 and tab. 1; results see tab.3 for averages and suppl. tab. 1 for all  
127 individual PDs). A visual discription of the methods is shown in fig. 3. The core top PDs of *P.*  
128 *limbata* that have been determined with method #1 were compared with the PDs of *Cibicides*  
129 *spp.* by Rathburn et al.<sup>15</sup> (Fig. 4A). Our new data complemented the dataset by Rathburn et al.<sup>15</sup>  
130 since it mainly added datapoints within the lower  $[\text{O}_2]_{\text{BW}}$  range. Logarithmic regression through  
131 the compiled datasets showed a highly significant relationship between the pore density of  
132 epibenthic foraminifera with  $[\text{O}_2]_{\text{BW}}$  ( $R^2 = 0.80$ ;  $F = 572$ ;  $P < 0.0001$ ) over a wide range from  
133 saturated  $\text{O}_2$  to nearly anoxic conditions ( $[\text{O}_2] < 2 \mu\text{mol/kg}$ ). The pore density is higher at  
134 locations with lower  $[\text{O}_2]$  (for visual example see Fig. 4B).

135 All of the four PD determination methods that we tested showed a significant relationship  
 136 between the mean core top PD of *P. limbata* and  $[O_2]_{BW}$  at the five locations that were used for  
 137 our local calibration (Fig. 4 C-F). Method #1 showed the worst correlation ( $R^2 = 0.92$ ;  $F = 33$ ;  
 138  $P = 0.01$ ) while the correlation was best using method #4 ( $R^2 = 0.97$ ;  $F = 86$ ;  $P = 0.0026$ ). In  
 139 addition, the variability of the PD after method #1 was very high at station M77/1-459/MUC-  
 140 25, which had the highest  $[O_2]_{BW}$  and the uncertainties of the regressions are also relatively high  
 141 (Fig. 4C). We therefore decided to use method #4 for our downcore  $[O_2]_{BW}$  reconstruction.

#### 142 **Downcore $[O_2]_{BW}$ reconstruction using the pore density epifaunal *P. limbata***

143 The  $[O_2]_{BW}$  for two time slices (LGM ~20-17 kyr BP and LH ~1-0 kyr BP) were reconstructed  
 144 at the southern boundary of the Peruvian OMZ (~17.5°S; ~500 mbs) using the PD of epifaunal  
 145 *P. limbata* (Fig. 5, Tab. 4, Suppl. Tab. 2 for all individual PDs). Since method #4 showed the  
 146 best correlation between PD and  $[O_2]_{BW}$ , we mainly used this method for the downcore  
 147 reconstructions.  $[O_2]_{BW}$  was therefore calculated according to Eq. 1:

$$148 \quad \text{Eq. 1:} \quad [O_2]_{BW} = -6027(\pm 652) \cdot PD + 22.0(\pm 1.7)$$

149 A progression of uncertainty was used to calculate the errors for the reconstructed  $[O_2]_{BW}$ . Both  
 150 the uncertainty of the mean PD within each sample and the uncertainties of the calibration  
 151 function were included. The propagation of uncertainty has been applied to Eq. 1, resulting in

$$152 \quad \text{Eq. 2:} \quad \sigma_{[O_2]_{BW}} = \sqrt{\left(\frac{\delta [O_2]_{BW}}{\delta a} \cdot \sigma_a\right)^2 + \left(\frac{\delta [O_2]_{BW}}{\delta PD} \cdot \sigma_{PD}\right)^2 + \left(\frac{\delta [O_2]_{BW}}{\delta b} \cdot \sigma_b\right)^2}$$

153 , where  $\sigma_x$  is the uncertainty (1sd) of the corresponding parameter  $x$  (in this case  $[O_2]_{BW}$ ,  $a$ ,  $b$   
 154 and  $PD$ ),  $a$  is the slope in eq.1 (in this case -6027) and  $b$  is the X-axis intercept (in this case  
 155 22.0). Application of Eq.2 on Eq.1 results in Eq.3 for the calculation of  $\sigma_{[O_2]_{BW}}$ .

$$156 \quad \text{Eq.3:} \quad \sigma_{[O_2]_{BW}} = \sqrt{(652 \cdot PD)^2 + (-6027 \cdot \sigma_{PD})^2 + (1.7)^2}$$

157 The standard error of the mean (SEM) was then calculated according to Eq.4:

$$158 \quad \text{Eq.4} \quad SEM_{[O_2]_{BW}} = \frac{\sigma_{[O_2]_{BW}}}{\sqrt{n}}$$

159 , where  $n$  is the # of specimens analyzed in each sample.

160 The short core M77/1-406/MUC-6 was used for the LH slice, while the longer M77/1-416/GC-  
 161 4 was used for the LGM slice. As mentioned above, only the data above 10 cm depth was used  
 162 for core M77/1-406/MUC-6 due to the hiatus below 10 cm depth. The specimens at a depth of  
 163 3.5 cm were very small and out of the range for the size normalization in method #4. For 3.5  
 164 cm depth we used the calibration of method #3 to calculate  $[O_2]_{BW}$ . Due to the low number of  
 165 specimens in the depths 5.5 cm, 7 cm and 9 cm, we decided to pool the specimens to one  
 166 datapoint in fig. 5.

167 The PD was significantly higher for the LH in comparison to the LGM ( $P < 0.001$ ;  $N = 114$ ;  
 168 two-sided heteroscedastic Student's T-test), indicating distinct deoxygenation at the southern  
 169 boundary of the Peruvian OMZ after the LGM. The mean  $[O_2]_{BW}$  was 11.1  $\mu\text{mol/kg}$  during the  
 170 LGM and 6.7  $\mu\text{mol/kg}$  during the LH indicating a loss of ~40%  $O_2$  at this location between  
 171 these two time slices. The  $[O_2]_{BW}$  was relatively constant during the LGM and, with one  
 172 exception, always higher than during the LH. Only at ~18.7 kyr BP, a sudden drop of  $[O_2]_{BW}$   
 173 to the concentration range of the LH was recognized.

#### 174 **Discussion**

175 **Modern pore density calibration for epibenthic foraminifera and methodological**  
176 **recommendations**

177 Our new data for the correlation of the PD of the epibenthic foraminiferal species *P. limbata* to  
178  $[O_2]_{BW}$  very well match the dataset for *Cibicides spp.* of Rathburn et al.<sup>15</sup> (Fig. 4A). Both  
179 datasets shown in fig. 4A used method #1 for the PD determination. Rathburn et al.<sup>15</sup> suggested  
180 to use the porosity instead of the PD for  $[O_2]$  reconstruction, since they found a better correlation  
181 with the porosity instead of PD. This is a good option for high resolution SEM images but our  
182 study is based on light micrographs that do not have a resolution allowing to accurately  
183 determine the pore area. Thus, we focused on the PD instead. This has the advantage that  
184 paleoreconstructions can solely be based on optical images that only need a stereo microscope  
185 or a macro objective with a good magnification coupled to a digital (optical) camera, which is  
186 less expensive and time consuming than electron microscopy.

187 Our data for *P. limbata* from the Peruvian OMZ is in very good agreement with the data for  
188 *Cibicides wuellerstorfi*, *Cibicides lobatulus* and *Planulina sp.* from the global dataset by  
189 Rathburn et al.<sup>15</sup>. This indicates that all these species adapt their PD in a similar way to  $O_2$   
190 availability and it is likely that the correlation can be adapted to other epibenthic species from  
191 a wide range of habitats as well. It has to be emphasized that this is different for denitrifying  
192 foraminifera such as *B. spissa*, which adapts its PD to nitrate availability<sup>20,21</sup>.

193 In literature there are different methods suggested for the determination of pore characteristics  
194 of benthic foraminifera. The most common method is to focus on a small window within a  
195 smooth surface in the middle of the ultimate or penultimate chamber<sup>15,17,18,39-41</sup> (Method #1 in  
196 this study). This has several advantages. This type of analysis is relatively fast, it minimizes  
197 artifacts related to the curvature of the specimens, normalizes regarding the ontogenetic stage  
198 of the specimen and ignores problems with overgrown pores. Nevertheless, the dataset for each  
199 individual foraminifer is limited, due to the small window size that is usually used for this  
200 method and there might be another factor that influences the pore characteristics in the ultimate  
201 and penultimate chambers: the stability of the test. Porosity and PD usually increases from the  
202 oldest to the youngest chamber related to the decreasing surface to volume ratio with increasing  
203 size of the specimen<sup>20</sup>. Our results also showed that the PD determined after method #1 was  
204 generally higher in comparison to the other methods (Fig. 4C-F). Other recent studies described  
205 that the stability of the foraminiferal test is decreasing with increasing porosity<sup>41</sup>. Richirt et al.<sup>41</sup>  
206 also found that different *Ammonia* phylotypes increase their porosity by building less but larger  
207 pores in their ultimate or penultimate chamber since the walls have more stability this way  
208 instead of simply building more pores. This might not be the case in older, less porous parts of  
209 the test where the porosity is not high enough to restrict the stability of the test walls. Finally,  
210 Method #1 ignores the pore free area between and on the outside corners of the test walls. These  
211 areas increase with increasing  $[O_2]_{BW}$  (Fig. 4B).

212 Another method that has been used in other studies to determine the PD is to focus on a larger  
213 size normalized part of the older chambers of the foraminifer<sup>20,21</sup> (Method #4 in this study).  
214 This method has the advantages that the ontogenetic effects are also minimized by size  
215 normalization, the larger area provides a larger dataset for each individual and the stability of  
216 the test walls is less restricting, since the older parts of the test are usually less porous. The main  
217 disadvantages of this method is the higher effort that is necessary to acquire the data, the  
218 problem that pores in older chambers might be overgrown and artifacts by the curvature of the  
219 tests.

220 An additional method that recently came up is the automated image analysis to determine the  
221 porosity on shards of benthic foraminifera after crushing using optical microscopy<sup>42</sup>. From all  
222 the methods so far this appears to be the least time consuming and it is possible to generate  
223 huge datasets with relatively low effort. Though, this method is destructive and it is neither  
224 possible to archive the specimens nor to use the specimens for other analyses. Finally, a method  
225 has been suggested for automated morphometric analysis on benthic foraminifera using atomic  
226 force microscopy<sup>43</sup>. This approach most likely generates the most metadata, since it is even  
227 possible to measure the depth and 3D shape of the pores but it is also the most effortful of the  
228 methods discussed above.

229 Our methodological comparison also included the elaboration if it is better to use the umbilical  
230 (Method #2) or the spiral side (Method #3&4) of the foraminifer for the PD analysis (Fig. 4D-  
231 F). The correlation between the PD of *P. limbata* and [O<sub>2</sub>]<sub>BW</sub> was better using the spiral side.  
232 The average umbilical PD is much higher than the average spiral PD. The closely related  
233 *Planulina ariminensis* was found on stalked substrates well above the sediment surface in that  
234 spiral and umbilical sides were exposed in the same way to the bottom-near water<sup>44</sup>. Therefore,  
235 the worse correlation on the umbilical side might be related to stability restrictions of the test  
236 wall due to the elevated porosity<sup>41</sup>. In addition, due to the higher PD, the determination on the  
237 umbilical side is usually more effortful. We thus suggest to always focus on the spiral side of  
238 the specimens for the application of PD or porosity as a paleo proxy. Since we found the best  
239 correlation between PD and [O<sub>2</sub>]<sub>BW</sub> using method #4 for our local calibration, we also used this  
240 method for our paleo [O<sub>2</sub>]<sub>BW</sub> reconstructions in this region. This does not mean that this is the  
241 best approach for other regions and foraminiferal species. The dataset using method #1 is now  
242 relatively large including the global data by Rathburn et al.<sup>15</sup> and our new data for *P. limbata*  
243 for the Peruvian OMZ. For [O<sub>2</sub>] reconstructions in regions of larger [O<sub>2</sub>] variability where no  
244 local calibration is available, we would therefore recommend to use method #1 and the  
245 correlation shown in fig. 4A. Though, our dataset includes only specimens from O<sub>2</sub> depleted  
246 locations. If [O<sub>2</sub>] should be reconstructed at locations with higher O<sub>2</sub> levels it might be good to  
247 focus on the calibration by Rathburn et al.<sup>15</sup> only and to use the porosity instead of the PD if  
248 high resolution electron micrographs are available.

#### 249 **Deoxygenation off Peru between the Last Glacial Maximum and the Late Holocene**

250 Our [O<sub>2</sub>]<sub>BW</sub> paleo reconstruction at 17.5°S off Peru (~500 mbs) indicates a deoxygenation from  
251 ~11.1 to 6.7 μmol/kg, which is equal to an O<sub>2</sub> loss of ~40% (~5 μmol/kg). This is in good  
252 agreement with other quantitative [O<sub>2</sub>] reconstructions in this region. Scholz et al.<sup>13</sup> found an  
253 [O<sub>2</sub>] drop of 5 – 10 μmol/kg at 11°S (240 mbs) and Erdem et al.<sup>12</sup> an [O<sub>2</sub>]<sub>BW</sub> decrease of ~50%  
254 in intermediate water depths (~1000 - 1250 mbs) below the Peruvian OMZ between the LGM  
255 and the LH. The modern O<sub>2</sub> in the Peruvian OMZ is located in water depths between 300 and  
256 400 mbs<sup>14</sup>. With ~500 m water depth sites M77/1 406-MUC6 and M77/1-416/GC-4 are located  
257 at the lower OMZ boundary. During the LGM, the sea level was ~120 m lower<sup>45</sup>. Thus, sites  
258 M77/1 406-MUC6 and M77/1-416/GC-4 would be shifted into water depths of today's core  
259 OMZ. This indicates that [O<sub>2</sub>]<sub>BW</sub> during the LGM was higher even within the core OMZ than  
260 compared to the lower OMZ boundary during the LH.

261 The elevated [O<sub>2</sub>]<sub>BW</sub> during the LGM is in good agreement with trends for the Pacific Ocean in  
262 the data compilations by Jaccard et al.<sup>46</sup> and Moffit et al.<sup>47</sup>. The simultaneous increase of [O<sub>2</sub>]  
263 during the LGM in all parts of the Peruvian OMZ is likely caused by interactions between  
264 decreased temperatures, higher [O<sub>2</sub>] to the subsurface water masses, the supply of preformed

265 nutrients to the subtropics and decreased coastal upwelling off Peru. The low sea surface  
266 temperatures during the LGM resulted in an increase of O<sub>2</sub> solubility and a generally higher  
267 [O<sub>2</sub>] in and increased formation of intermediate water masses, that supply O<sub>2</sub> to subsurface  
268 water masses off Peru<sup>13,14,48</sup>. In addition, there was likely an increase in Fe supply to higher  
269 latitudes during the LGM, related to the lower sea level, the lower Fe burial, due to the decrease  
270 in shelf sediments and increased erosion<sup>49,50</sup>. This Fe fertilization at high latitudes stimulated  
271 primary productivity at the Southern Ocean which resulted in an increased burial of pre-formed  
272 nutrients to the deep Southern Ocean<sup>21,50</sup>. This reduced the concentration preformed nutrients  
273 in Subantarctic Mode Water, which supplied nutrients to the subtropics, and affected limitation  
274 of primary productivity at lower latitudes<sup>21,50</sup>. Less O<sub>2</sub> was consumed by remineralization below  
275 the photic zone due to this decrease in primary productivity. This is supported by a quantitative  
276 NO<sub>3</sub><sup>-</sup> record at the Northern part of the Peruvian OMZ<sup>21</sup>. Finally, the intertropical convergence  
277 zone (ITCZ) experienced a southward shift during the LGM at the Eastern Tropical Pacific,  
278 implying a general decrease in coastal upwelling in this region<sup>14,51</sup>. A study on the change  
279 nutrient utilization at the Peruvian OMZ during the last deglaciation based on stable Si isotope  
280 fractionation also infers a decrease in upwelling during the LGM at 15°S close to our study  
281 site<sup>52</sup>. Though, due to the distinct hiatus at our location there is only a slight overlap in this  
282 record and our data at the end of the LGM.

283 The common observation that [O<sub>2</sub>] at the Peruvian OMZ was higher during the LGM in shallow  
284 depths ~240 m<sup>13</sup>, intermediate depths ~500 m (this study) and “deep”-intermediate depths  
285 ~1,000 – 1,250 m<sup>12</sup> indicates that the LGM conditions at the Eastern Tropical South Pacific  
286 were decoupled from the Eastern Equatorial Pacific<sup>30,53</sup>. Actually, the OMZ at the Eastern  
287 Tropical Pacific was expanded during the LGM, likely due to a decrease in ventilation and an  
288 increase in the respired deep carbon storage in intermediate to deep water depths during the  
289 LGM<sup>30</sup>. In addition, a recent study showed that there was no shallow OMZ at the Eastern  
290 Equatorial Pacific during the LGM but a massive suboxygenated zone connecting the old O<sub>2</sub> depleted  
291 deep to intermediate water masses<sup>53</sup>. The shallow OMZ at the Eastern Equatorial Pacific only  
292 established during the Holocene<sup>53</sup>. The results from the regionally adjacent Peruvian margin  
293 indicate that there was a shallow OMZ at the Eastern Tropical South Pacific which was similar  
294 but less O<sub>2</sub> depleted than during the LH (Fig. 6). A comparison of the available quantitative  
295 [O<sub>2</sub>] paleo data with modern conditions indicates that the oxycline below the OMZ is steeper  
296 today than during the LGM or the LH.

297 During the LGM time slice there are no obvious trends in [O<sub>2</sub>]<sub>BW</sub> at site M77/1-416/GC-4  
298 indicating that the conditions were relatively stable during this time interval. The LH time slice  
299 at site M77/1 406-MUC6 starts ~1 kyr BP. Within this time interval there is a distinct trend in  
300 decreasing [O<sub>2</sub>]<sub>BW</sub> over time. A record of sea surface temperatures ~17°S, close to our location  
301 documented a strong cooling trend during this time interval<sup>54</sup> and another record at 14°S showed  
302 an increase in sedimentary fish scales and the redox sensitive Mo/Re ratio<sup>14</sup>. Thus, the  
303 decreasing bottom water [O<sub>2</sub>]<sub>BW</sub> over the past 1 kyr are likely related to an increase in upwelling  
304 and primary productivity in this region. Mean modern [O<sub>2</sub>]<sub>BW</sub> close to our study site is highly  
305 variable (range from ~1-25 μmol/kg<sup>55-58</sup>). All the [O<sub>2</sub>]<sub>BW</sub> in our palaeorecord are within this  
306 range of modern [O<sub>2</sub>]<sub>BW</sub> variability (See fig. 5). Though, there seem to be [O<sub>2</sub>] pulses ~17.5°S  
307 at ~500 m that exceed our averaged values from the palaeorecord. This might be related to  
308 seasonality in the life cycle of *P. limbata*. Another explanation for this phenomenon could be  
309 an observation that bottom waters at the Peruvian shelf became more oxygenated over the last  
310 ~100 yr<sup>59</sup>.

311 In conclusion, our quantitative  $[O_2]_{BW}$  is in good agreement with other palaeorecords from the  
312 Peruvian OMZ and the combined datasets of these studies indicate a similar but weaker OMZ  
313 during the LGM. We found a deoxygenation of ~40% in intermediate water at 17.5°S off Peru  
314 between the LGM and the LH which is likely related to higher temperatures (lower  $O_2$   
315 solubility), increased nutrient and decreased oxygen supply by source waters and an increase in  
316 coastal upwelling. This is a contrasting situation to the adjacent Eastern Equatorial Pacific,  
317 which had an expansion of  $O_2$  depleted waters to deeper depth but better ventilated shallow  
318 waters during the LGM<sup>30,53</sup>.

## 319 **Methods**

### 320 **Sampling procedure**

321 Six short sediment cores from the Peruvian OMZ were extracted during R.V. *Meteor* cruise  
322 M77/1 in October 2008 using a video guided multicorer (Fig. 1; tab. 1). Within a couple of  
323 minutes after the multicorer came on deck, one tube was chosen from the array, and brought to  
324 a laboratory with a constant room temperature of 4°C. Supernatant water of the core was  
325 carefully removed. Then the core was gently pushed out of the multicorer tube and cut into 12  
326 slices (10-mm-thick) for benthic foraminiferal analysis. The samples were transferred to Whirl-  
327 Pak™ plastic bags and transported at a temperature of 4°C. One additional long sediment core  
328 (3.88 m) was extracted using a gravity corer (M77/1 416-GC4; tab. 1). This core was  
329 immediately cut into one meter sections and each section was sliced into two halves (work and  
330 archive half). These were stored and transported back at a temperature of 4°C. The samples of  
331 these seven cores were used to collect the specimens for the PD analyses, radiocarbon dating  
332 and benthic foraminiferal  $\delta^{18}O$  measurements.

### 333 **Foraminiferal studies**

334 The sediment samples were washed over a 63- $\mu m$  mesh sieve and dried at 50°C. They were  
335 further subdivided into the grain-size fractions of 63–125, 125–250, 250–315, 315–355,  
336 355–400, and > 400  $\mu m$ . Specimens of the epifaunal species *P. limbata* were picked from the  
337 >400  $\mu m$  fraction. Specimens of *Uvigerina striata* and *Uvigerina peregrina* were picked from  
338 the 355–400  $\mu m$  fraction.

339 Images of *P. limbata* were taken using a MiniPixie MPX2051UC CCD camera (AOS  
340 Technologies™), mounted on a macro objective (1-6233 and 1-6010 by Navitar™). The  
341 programs AxioVision, Zen and ImageJ were used for the image analyses. In total 185 specimens  
342 were used for the image analyses.

343 Two additional specimens from M77/1-487/MUC-39 ( $[O_2]_{BW} = 3.70 \mu mol/kg$ ; see tab.1) and  
344 M77/1-565/MUC-60 ( $[O_2]_{BW} = 8.17 \mu mol/kg$ ; see tab.1) were imaged with scanning electron  
345 microscopy (SEM) for visual documentation of the influence of  $[O_2]_{BW}$  on the porosity of *P.*  
346 *limbata* (see fig. 4B). These two specimens were mounted on aluminum stubs, sputter-coated  
347 with gold, and imaged using a CamScan-CS-44 SEM at the Christian-Albrecht-University in  
348 Kiel.

349 Additional specimens of *P. limbata* from 12 sediment depths were used for the radiocarbon  
350 dating on core M77/1 416-GC4. The radiocarbon dating for three sediment depths on core  
351 M77/1 406-MUC6 has been done on sedimentary organic matter. All radiocarbon analyses were  
352 performed at Beta Analytic, Inc., Florida, USA.

353 Three to six individuals of *U. peregrina* and *U. striata* were used for the stable isotope  
354 measurements ( $\delta^{18}\text{O}$  and  $\delta^{13}\text{C}$ ). The tests of the foraminiferal specimens were gently crushed  
355 between two glass slides and the fragments were mixed. The measurements were performed at  
356 GEOMAR, Kiel, using a Thermo Scientific MAT253 mass spectrometer equipped with an  
357 automated CARBO Kiel IV carbonate preparation device. The isotope values were reported in  
358 permil (‰) relative to the Vienna Pee Dee Belemnite (VPDB) scale and calibrated vs. NBS 19  
359 (National Bureau of Standards) as well as to an in-house standard (Solnhofen limestone). Long-  
360 term analytical accuracy (1-sigma) for  $\delta^{18}\text{O}$  and  $\delta^{13}\text{C}$  was  $<0.06\text{‰}$  and  $<0.03\text{‰}$ , respectively.

### 361 Foraminiferal pore densities

362 Four different methods have been applied and tested to determine the PD of *P. limbata* in order  
363 to compare the data with the global porosity calibration on *Cibicides spp.* from Rathburn et al.<sup>15</sup>  
364 and to achieve the best possible local calibration of PD vs.  $[\text{O}_2]_{\text{BW}}$  (see also Fig. 3).

365 #1.: According to Rathburn et al.<sup>15</sup> and Petersen et al.<sup>40</sup> PDs from the core top samples were  
366 determined in the middle of the chamber within a rectangular window with a size of  $\sim 5000$   
367  $\mu\text{m}^2$ . This method has the advantage that a very smooth and flat surface can be chosen and  
368 artifacts by the curvature of the sample were avoided. Rathburn et al.<sup>15</sup> chose the ultimate and  
369 penultimate chambers for this analyses. We always chose the best preserved chamber without  
370 cracks or overgrowths that was closest to the ultimate chamber. This was in most cases either  
371 the ultimate or penultimate chamber (Fig. 3A).

372 #2.: PDs were determined on the umbilical side of the specimen. Pores were counted manual  
373 on the whole specimen and the PD is the average of the whole specimen<sup>60</sup> (Fig. 3B).

374 #3.: Same as method 2 but the spiral side was used instead of the umbilical side<sup>60</sup> (Fig. 3C).

375 #4.: Same as method 3 but the samples were size normalized to minimize ontogenetic effects<sup>60</sup>.  
376 Specimens that had a smaller surface area than  $400000 \mu\text{m}^2$  were excluded from the dataset and  
377 for specimens larger than  $700000 \mu\text{m}^2$  the last number of chambers were excluded until the  
378 total analysed area was  $<700000 \mu\text{m}^2$  (Fig. 3D).

379 All four methods have been applied to the core top samples and only method #4 was used for  
380 the downcore PD analyses in M77/1 416-GC4 and M77/1 406-MUC6.

### 381 References

- 382 1. Stramma, L., Johnson, G. C., Sprintall, J. & Mohrholz, V. Expanding Oxygen-  
383 Minimum Zones in the Tropical Oceans. *Science* (80-. ). **320**, 655 LP – 658 (2008).
- 384 2. Schmidtko, S., Stramma, L. & Visbeck, M. Decline in global oceanic oxygen content  
385 during the past five decades. *Nature* **542**, 335–339 (2017).
- 386 3. Lam, P. et al. Revising the nitrogen cycle in the Peruvian oxygen minimum zone. *Proc.*  
387 *Natl. Acad. Sci.* **106**, 4752–4757 (2009).
- 388 4. Berger, W., Smetacek, V. & Wefer, G. Ocean productivity and paleoproductivity - An  
389 overview. in *Productivity of the Ocean: Present and Past, Dahlem Workshop Reports*  
390 1–34 (Wiley-Interscience Publ., 1989).
- 391 5. Brockmann, C., Fahrbach, E., Huyer, A. & Smith, R. L. The poleward undercurrent  
392 along the Peru coast: 5 to 15°S. *Deep Sea Res. A* **27**, 847–856 (1980).
- 393 6. Shaffer, G., Salinas, S., Pizarro, O., Vega, A. & Hormazabal, S. Currents in the deep

- 394 ocean off Chile (30°S). *Deep Sea Res. Part I Oceanogr. Res. Pap.* **42**, 425–436 (1995).
- 395 7. Shaffer, G., Pizarro, O., Djurfeldt, L., Salinas, S. & Rutllant, J. Circulation and Low-  
396 Frequency Variability near the Chilean Coast: Remotely Forced Fluctuations during the  
397 1991–92 El Niño. *J. Phys. Oceanogr.* **27**, 217–235 (1997).
- 398 8. Böning, P. *et al.* Geochemistry of Peruvian near-surface sediments. *Geochim.*  
399 *Cosmochim. Acta* **68**, 4429–4451 (2004).
- 400 9. Mackas, D. L., Strub, P., Thomas, A. & Montecino, V. Eastern ocean boundaries pan-  
401 regional overview. *Sea* 21–59 (2006).
- 402 10. Díaz-Ochoa, J. A. *et al.* Fish scales in sediments from off Callao, central Peru. *Deep*  
403 *Sea Res. Part II Top. Stud. Oceanogr.* **56**, 1124–1135 (2009).
- 404 11. Suess, E., Kulm, L. & Killingly, J. Coastal upwelling and a history of organic-rich  
405 mudstone deposition off Peru. in *Geological Society, London, Special Publications* vol.  
406 26 181–197 (1987).
- 407 12. Erdem, Z. *et al.* Bottom-water deoxygenation at the Peruvian margin during the last  
408 deglaciation recorded by benthic foraminifera. *Biogeosciences* **17**, 3165–3182 (2020).
- 409 13. Scholz, F., Mcmanus, J., Mix, A. C., Hensen, C. & Schneider, R. R. The impact of  
410 ocean deoxygenation on iron release from continental margin sediments. **7**, 433–437  
411 (2014).
- 412 14. Salvattecchi, R. *et al.* Fish debris in sediments from the last 25 kyr in the Humboldt  
413 Current reveal the role of productivity and oxygen on small pelagic fishes. *Prog.*  
414 *Oceanogr.* **176**, (2019).
- 415 15. Rathburn, A. E., Willingham, J., Ziebis, W., Burkett, A. M. & Corliss, B. H. A New  
416 biological proxy for deep-sea paleo-oxygen: Pores of epifaunal benthic foraminifera.  
417 *Sci. Rep.* **8**, 9456 (2018).
- 418 16. Davis, C. V., Wishner, K., Renema, W. & Hull, P. M. Vertical distribution of planktic  
419 foraminifera through an oxygen minimum zone: how assemblages and test morphology  
420 reflect oxygen concentrations. *Biogeosciences* **18**, 977–992 (2021).
- 421 17. Kuhnt, T. *et al.* Relationship between pore density in benthic foraminifera and bottom-  
422 water oxygen content. *Deep Sea Res. Part I Oceanogr. Res. Pap.* **76**, 85–95 (2013).
- 423 18. Richirt, J. *et al.* Morphological Distinction of Three *Ammonia* Phylotypes Occurring  
424 Along European Coasts. *J. Foraminifer. Res.* **49**, 76–93 (2019).
- 425 19. Schönfeld, J., Beccari, V., Schmidt, S. & Spezzaferri, S. Biometry and taxonomy of  
426 Adriatic *Ammonia* species from Bellaria-Igea Marina (Italy). *J.*  
427 *Micropalaeontology* **40**, 195–223 (2021).
- 428 20. Glock, N. *et al.* Environmental influences on the pore density of *Bolivina spissa*  
429 (Cushman). *J. Foraminifer. Res.* **41**, 22–32 (2011).
- 430 21. Glock, N. *et al.* Coupling of oceanic carbon and nitrogen facilitates spatially resolved  
431 quantitative reconstruction of nitrate inventories. *Nat. Commun.* **9**, 1217 (2018).
- 432 22. Risgaard-Petersen, N. *et al.* Evidence for complete denitrification in a benthic  
433 foraminifer. *Nature* **443**, 93–96 (2006).
- 434 23. Piña-Ochoa, E. *et al.* Widespread occurrence of nitrate storage and denitrification



- 435 among Foraminifera and Gromiida. *Proc. Natl. Acad. Sci.* **107**, 1148–1153 (2010).
- 436 24. Woehle, C. *et al.* A novel eukaryotic denitrification pathway in foraminifera. *Curr.*  
437 *Biol.* **in review**, (2018).
- 438 25. Orsi, W. D. *et al.* Anaerobic metabolism of Foraminifera thriving below the seafloor.  
439 *ISME J.* **14**, 2580–2594 (2020).
- 440 26. Gomaa, F. *et al.* Multiple integrated metabolic strategies allow foraminiferan protists to  
441 thrive in anoxic marine sediments. *Sci. Adv.* **7**, eabf1586 (2021).
- 442 27. Glock, N. *et al.* Metabolic preference of nitrate over oxygen as an electron acceptor in  
443 foraminifera from the Peruvian oxygen minimum zone. *Proc. Natl. Acad. Sci.* **116**,  
444 2860–2865 (2019).
- 445 28. Christian, W. *et al.* Denitrification in foraminifera has an ancient origin and is  
446 complemented by associated bacteria. *Proc. Natl. Acad. Sci.* **119**, e2200198119 (2022).
- 447 29. Mackensen, A., Schmiedl, G., Harloff, J. & Giese, M. Deep-sea foraminifera in the  
448 South Atlantic Ocean; ecology and assemblage generation. *Micropaleontology* **41**,  
449 342–358 (1995).
- 450 30. Hoogakker, B. A. A. *et al.* Glacial expansion of oxygen-depleted seawater in the  
451 eastern tropical Pacific. *Nature* **562**, 410–413 (2018).
- 452 31. Skinner, L. C. & Bard, E. Radiocarbon as a Dating Tool and Tracer in  
453 Paleooceanography. *Rev. Geophys.* **60**, e2020RG000720 (2022).
- 454 32. Bova, S. C., Herbert, T. D. & Altabet, M. A. Ventilation of Northern and Southern  
455 Sources of Aged Carbon in the Eastern Equatorial Pacific During the Younger Dryas  
456 Rise in Atmospheric CO<sub>2</sub>. *Paleoceanogr. Paleoclimatology* **33**, 1151–1168 (2018).
- 457 33. Butzin, M., Heaton, T. J., Köhler, P. & Lohmann, G. A Short Note on Marine  
458 Reservoir Age Simulations Used in IntCal20. *Radiocarbon* **62**, 865–871 (2020).
- 459 34. Heaton, T. J. *et al.* Marine20 - the marine radiocarbon age calibration curve (0 - 55,000  
460 cal BP), simulated data for IntCal20. (2020) doi:10.1594/PANGAEA.914500.
- 461 35. Reimer, P. J. *et al.* The IntCal20 Northern Hemisphere Radiocarbon Age Calibration  
462 Curve (0-55 cal kBP). *Radiocarbon* **62**, 725–757 (2020).
- 463 36. Haslett, J. & Parnell, A. A simple monotone process with application to radiocarbon-  
464 dated depth chronologies. *J. R. Stat. Soc. Ser. C (Applied Stat.)* **57**, 399–418 (2008).
- 465 37. Erdem, Z. *et al.* Peruvian sediments as recorders of an evolving hiatus for the last 22  
466 thousand years. *Quat. Sci. Rev.* **137**, 1–14 (2016).
- 467 38. Mosch, T. *et al.* Factors influencing the distribution of epibenthic megafauna across the  
468 Peruvian oxygen minimum zone. *Deep Sea Res. Part I Oceanogr. Res. Pap.* **68**, 123–  
469 135 (2012).
- 470 39. Kuhnt, T. *et al.* AUTOMATED AND MANUAL ANALYSES OF THE PORE  
471 DENSITY-TO-OXYGEN RELATIONSHIP IN GLOBOBULIMINA TURGIDA  
472 (BAILEY). *J. Foraminifer. Res.* **44**, 5–16 (2014).
- 473 40. Petersen, J. *et al.* Improved methodology for measuring pore patterns in the benthic  
474 foraminiferal genus *Ammonia*. *Mar. Micropaleontol.* **128**, 1–13 (2016).
- 475 41. Richirt, J. *et al.* Scaling laws explain foraminiferal pore patterns. *Sci. Rep.* **9**, 9149

- 476 (2019).
- 477 42. Tetard, M., Beaufort, L. & Licari, L. A new optical method for automated pore analysis  
478 on benthic foraminifera. *Mar. Micropaleontol.* **136**, 30–36 (2017).
- 479 43. Giordano, L., Ferraro, L., Salvatore, M., Oscurato, S. L. & Maddalena, P.  
480 Morphometric analysis on benthic foraminifera through Atomic Force Microscopy.  
481 *Mar. Micropaleontol.* **153**, 101775 (2019).
- 482 44. Lutze, G. F. & Thiel, H. Epibenthic foraminifera from elevated microhabitats;  
483 *Cibicidoides wuellerstorfi* and *Planulina ariminensis*. *J. Foraminifer. Res.* **19**, 153–158  
484 (1989).
- 485 45. Fairbanks, R. G. A 17,000-year glacio-eustatic sea level record: influence of glacial  
486 melting rates on the Younger Dryas event and deep-ocean circulation. *Nat.* **1989**  
487 *3426250* **342**, 637–642 (1989).
- 488 46. Jaccard, S. L. & Galbraith, E. D. Large climate-driven changes of oceanic oxygen  
489 concentrations during the last deglaciation. *Nat. Geosci.* **2012** *52* **5**, 151–156 (2011).
- 490 47. Moffitt, S. E. *et al.* Paleoceanographic Insights on Recent Oxygen Minimum Zone  
491 Expansion: Lessons for Modern Oceanography. *PLoS One* **10**, e0115246 (2015).
- 492 48. Meissner, K. J., Galbraith, E. D. & Völker, C. Denitrification under glacial and  
493 interglacial conditions: A physical approach. *Paleoceanography* **20**, (2005).
- 494 49. Albani, S. *et al.* Improved dust representation in the Community Atmosphere Model. *J.*  
495 *Adv. Model. Earth Syst.* **6**, 541–570 (2014).
- 496 50. Somes, C. J., Schmittner, A., Muglia, J. & Oschlies, A. A Three-Dimensional Model of  
497 the Marine Nitrogen Cycle during the Last Glacial Maximum Constrained by  
498 Sedimentary Isotopes. *Front. Mar. Sci.* **4**, 108 (2017).
- 499 51. Koutavas, A. & Lynch-Stieglitz, J. Variability of the Marine ITCZ over the Eastern  
500 Pacific during the Past 30,000 Years. 347–369 (2004) doi:10.1007/978-1-4020-2944-  
501 8\_13.
- 502 52. Doering, K. *et al.* Changes in diatom productivity and upwelling intensity off Peru  
503 since the Last Glacial Maximum: Response to basin-scale atmospheric and oceanic  
504 forcing. *Paleoceanography* **31**, 1453–1473 (2016).
- 505 53. Davis, C. V. Deglacial restructuring of the Eastern equatorial Pacific oxygen minimum  
506 zone. *Commun. Earth Environ.* **3**, 145 (2022).
- 507 54. Salvatelli, R., Schneider, R. R., Blanz, T. & Mollier-Vogel, E. Deglacial to Holocene  
508 Ocean Temperatures in the Humboldt Current System as Indicated by Alkenone  
509 Paleothermometry. *Geophys. Res. Lett.* **46**, 281–292 (2019).
- 510 55. Krahnemann, G. Physical oceanography during METEOR cruise M77/1.  
511 <https://doi.pangaea.de/10.1594/PANGAEA.777978> (2012).
- 512 56. Krahnemann, G. Physical oceanography during METEOR cruise M77/3. *IFM-GEOMAR*  
513 *Leibniz-Institute of Marine Sciences, Kiel University* (2012)  
514 doi:10.1594/PANGAEA.777255.
- 515 57. Boyer, T. P. *et al.* World ocean database 2018. (2018)  
516 doi:<http://doi.org/10.7289/V5NZ85MT>.

- 517 58. Farías, L., Carrasco, C. & Faúndez, J. Nitrous oxide and biogeochemical variables  
518 related to Intermediate Waters into Eastern South Pacific Ocean. *Supplement to:*  
519 *Carrasco, Cristina; Karstensen, Johannes; Farías, Laura (2017): On the Nitrous*  
520 *Oxide Accumulation in Intermediate Waters of the Eastern South Pacific Ocean.*  
521 *Frontiers in Marine Science*, 4, <https://doi.org/10.3389/fmars.2017.00024> (2019)  
522 doi:10.1594/PANGAEA.906231.
- 523 59. Cardich, J. *et al.* Multidecadal Changes in Marine Subsurface Oxygenation Off Central  
524 Peru During the Last ca. 170 Years. *Front. Mar. Sci.* **0**, 270 (2019).
- 525 60. Jauch, S. Kalibration der Porendichte von *Planulina limbata* als potentiellen Proxy für  
526 Redoxbedingungen in der Peruvianischen Sauerstoffminimumzone. (Christian-  
527 Albrechts-Universität zu Kiel, 2013).
- 528 61. Schlitzer, R. Ocean Data View. (2015).
- 529 62. Glock, N., Liebetrau, V. & Eisenhauer, A. I/Ca ratios in benthic foraminifera from the  
530 Peruvian oxygen minimum zone: Analytical methodology and evaluation as a proxy for  
531 redox conditions. *Biogeosciences* **11**, (2014).

### 532 **Acknowledgements**

533 The scientific party on R/V Meteor cruise M77 is acknowledged for their general support and  
534 help with the coring operation and sampling. We thank Sabrina Jauch for her pioneering work  
535 on calibrating the pore density of *Planulina limbata* during her bachelor thesis. Tanita Wein  
536 provided additional student assistance to compare the methods for the determination of pore  
537 densities. Funding was provided by the Deutsche Forschungsgemeinschaft (DFG) through both  
538 the SFB 754 “Climate–Biogeochemistry Interactions in the Tropical Ocean” and N. Glock’s  
539 Heisenberg grant GL 999/3-1.

### 540 **Competing interests**

541 The Authors declare no conflict of interests.

### 542 **Author contributions**

543 All authors planned the sampling strategy and study design. N. G. did onboard sampling,  
544 analyzed and interpreted the foraminiferal pore density data and did core-writing of the  
545 manuscript. Z. E. sampled the material for the radiocarbon dating and the stable oxygen isotope  
546 stratigraphy. All authors contributed writing the manuscript.

547

548 **Figure captions:**

549 Figure 1: Map with sampling locations together with dissolved oxygen concentration at 300  
550 mbss in the Southeastern Pacific Ocean (inset map). Data is obtained from World Ocean Atlas  
551 2018<sup>57</sup>. Black crosses indicate the locations of MUC samples used for the core top calibration  
552 of PD vs [O<sub>2</sub>]<sub>BW</sub>. Red diamond shows the location of sediment cores M77/1-406/MUC-6 and  
553 M77/1-416/GC-4) used for the paleoreconstruction of [O<sub>2</sub>]<sub>BW</sub>. Prepared using Ocean Data  
554 View<sup>61</sup>.

555 Figure 2: Age depth models for cores M77/1 406-MUC6 (A) and M77/1 416-GC4 (B). These  
556 models are based on <sup>14</sup>C dating and have been modeled using the Bchron software package<sup>36</sup>.  
557 Error bands show 95% confidence intervals. The probability distributions and highest density

558 regions are shown for the  $^{14}\text{C}$  age of each analyzed sample. Note that sample 416\_10 has been  
559 excluded from the age model as an outlier (age reversal).

560 Figure 3: Visual description of the four methods that have been compared to determine the PD  
561 of *Planulina limbata*. For a detailed description of these methods see text. A: Method #1; B:  
562 Method #2; C: Method #3; D: Method #4.

563 Figure 4: **A:** Comparison of epifaunal PD vs.  $[\text{O}_2]_{\text{BW}}$  correlation between our study (red dots)  
564 and Rathburn et al.<sup>15</sup> (Black dots). PDs of each individual foraminiferal specimen are plotted.  
565 All PDs in this plot were determined after method #1. The dashed line is a logarithmic  
566 regression through all data points (Equation and statistics are shown in figure). **B:** Scanning  
567 electron micrographs of two epifaunal *Planulina limbata* specimens (umbilical side) with  
568 different porosity features. Specimen A (higher porosity) is from M77/1-487/MUC-39 ( $[\text{O}_2]_{\text{BW}}$   
569 = 3.70  $\mu\text{mol/kg}$ ); Specimen B (Lower porosity) is from M77/1-565/MUC-60 ( $[\text{O}_2]_{\text{BW}}$  = 8.17  
570  $\mu\text{mol/kg}$ ). **C-F:** Comparison of the four methods that have been tested to determine the  
571 correlation between  $[\text{O}_2]_{\text{BW}}$  and the mean the PD of *Planulina limbata* in each sample. For a  
572 detailed description of these methods see text. C: Method #1; D: Method #2; E: Method #3; F:  
573 Method #4. Solid lines are linear regressions (Equation and statistics are shown in figure). Error  
574 bars are the standard error of the mean (1SEM).

575 Figure 5: Quantitative palaeorecord of mean  $[\text{O}_2]_{\text{BW}}$  in cores M77/1 406-MUC6 and M77/1  
576 416-GC4 using the PD of *Planulina limbata*. Note that the slice during the Late Holocene (LH)  
577 is from M77/1 406-MUC6 and the slice from the Last Glacial Maximum (LGM) from core  
578 M77/1 416-GC4. All PDs were determined after method #4, except in the one sample plotted  
579 as a grey triangle. In this sample specimens were too small for size normalization and PD and  
580  $[\text{O}_2]_{\text{BW}}$  were determined using method #3. Since only two specimens were found in one sample  
581 each individual reconstructed  $[\text{O}_2]_{\text{BW}}$  instead of mean values were plotted as grey crosses.  
582 Horizontal errors are the standard deviation (1SD) Vertical error bars are standard error of the  
583 mean (1SEM) except for the grey crosses (1SD). Mean modern  $[\text{O}_2]_{\text{BW}}$  in this region is highly  
584 variable in this region (range from 1-25  $\mu\text{mol/kg}$ <sup>55-58</sup>). The red dot represents the mean modern  
585  $[\text{O}_2]_{\text{BW}}$  (red dashed line = 1SD). Note that all the reconstructed  $[\text{O}_2]_{\text{BW}}$  are within the range of  
586 short time modern variability.

587 Figure 6:  $[\text{O}_2]_{\text{BW}}$  reconstructed with different approaches for different depths at the Peruvian  
588 OMZ during the LGM (red) and the LH (Black). Data at 1000 – 1250 m is from Erdem et al.<sup>12</sup>,  
589 at ~500 m from this study and ~240 m from Scholz et al.<sup>13</sup>. Modern data is from 11°S M77/1-  
590 438/CTD-RO-16<sup>55</sup>. Note that water depths during the LGM have all been corrected by the lower  
591 sea level of ~120 m<sup>45</sup>. Datapoints for our data and Erdem et al.<sup>12</sup> are the weighted mean for  
592 each time slice and error bars are the standard error for the weighted mean. Scholz et al.<sup>13</sup>  
593 indicated a range of 5-10  $\mu\text{mol/kg}$  for the LGM (shown here as  $7.5 \pm 2.5$   $\mu\text{mol/kg}$ ). The data  
594 for the LH from Scholz et al.<sup>13</sup> was calculated after their figure 1b and indicated always anoxic  
595 conditions (here shown as 1  $\mu\text{mol/kg}$  without error bar).

596

597

Tab.1

598 Station list. Station names in *italic* letters indicate that these stations were used for the paleo O<sub>2</sub>  
 599 reconstruction. The other stations were used for the modern PD calibrations. <sup>a</sup>: [O<sub>2</sub>]<sub>BW</sub> taken  
 600 from Glock et al.<sup>62</sup>; <sup>b</sup>: [O<sub>2</sub>]<sub>BW</sub> taken from Glock et al.<sup>20</sup>; \*: The [O<sub>2</sub>] gradient at the lower OMZ  
 601 boundary was very steep at this location which results in a highly variable modern [O<sub>2</sub>]<sub>BW</sub>.  
 602 Different data sources list values between 1 and 25 μmol/kg<sup>55-58</sup>.

| Station                | Latitude<br>(°W) | Longitude<br>(°S) | Water depth<br>(m) | [O <sub>2</sub> ] <sub>BW</sub><br>(μmol/kg) |
|------------------------|------------------|-------------------|--------------------|----------------------------------------------|
| M77/1-553/MUC-54       | 78°54.70'        | 10°26.38'         | 521                | 3.00 <sup>a</sup>                            |
| M77/1-487/MUC-39       | 78°23.17'        | 11°00.00'         | 579                | 3.70 <sup>b</sup>                            |
| M77/2-723/MUC-47-3     | 80°31.36'        | 07°52.01'         | 626                | 8.10 <sup>a</sup>                            |
| M77/1-565/MUC-60       | 78°21.40'        | 11°08.00'         | 640                | 8.17 <sup>b</sup>                            |
| M77/1-459/MUC-25       | 78°25.60'        | 11°00.02'         | 698                | 12.55 <sup>b</sup>                           |
| <i>M77/1-406/MUC-6</i> | 71°52.40'        | 17°28.00'         | 492                | *                                            |
| <i>M77/1-416/GC-4</i>  | 71°52.62'        | 17°28.14'         | 505                | *                                            |

603

604

605

606

607

608

609

610

611

Table 2:

612 Radiocarbon ( $^{14}\text{C}$ ) dating results for cores M77/1 416-GC4 and M77/1 406-MUC6.  $^{14}\text{C}$  ages were determined on epibenthic *Planulina limbata* in M77/1 416-GC4 and on bulk  
 613 sedimentary organic matter (Bulk  $\text{C}_{\text{org}}$ ) for core M77/1 406-MUC6. All  $^{14}\text{C}$  ages have been corrected for the marine reservoir ages (MRA) for 18.75°S 75°W for the different time  
 614 slices modelled by Butzin et al.<sup>33,34</sup> (Suppl. Fig. 1).  $^{14}\text{C}$  ages of *P. limbata* were additionally corrected for the benthic-planktic  $^{14}\text{C}$  offset measured in CDH 26 by Bova et al.<sup>32</sup>.  
 615 SDs are the standard deviations. Propagated SDs for M77/1 416-GC4 include the errors from *P. limbata* in this core and the planktic and benthic  $^{14}\text{C}$  ages from Bova et al.<sup>32</sup>. The  
 616 range (2.5% - 97.5%) of the calibrated ages (Cal. age) has been modelled from the corrected atmospheric (atm.)  $^{14}\text{C}$  age with Intcal20<sup>35</sup> using the Bchron software package<sup>36</sup>. Data  
 617 in italic letters has been excluded from the age model, due to age reversals/redeposition (see text for details).

| Core name             | depth (cm)   | type                                           | $^{14}\text{C}$ age ( $^{14}\text{C}$ yr) | SD        | Benthic-planktic offset ( $^{14}\text{C}$ yr) <sup>32</sup> | Benthic SD from Benthic-planktic offset ( $^{14}\text{C}$ yr) <sup>32</sup> | Planktic SD from Benthic-planktic offset ( $^{14}\text{C}$ yr) <sup>32</sup> | Benthic-planktic offset corrected $^{14}\text{C}$ age ( $^{14}\text{C}$ yr) | MRA ( $^{14}\text{C}$ yr) <sup>34</sup> | Corrected atm. $^{14}\text{C}$ age ( $^{14}\text{C}$ yr) | Propagated SD | Cal. age min (yr BP) | Cal. age max (yr BP) |
|-----------------------|--------------|------------------------------------------------|-------------------------------------------|-----------|-------------------------------------------------------------|-----------------------------------------------------------------------------|------------------------------------------------------------------------------|-----------------------------------------------------------------------------|-----------------------------------------|----------------------------------------------------------|---------------|----------------------|----------------------|
| M77/1 416-GC4         | 20           | <i>P. limbata</i>                              | 15900                                     | 60        | 850                                                         | 60                                                                          | 65                                                                           | 15050                                                                       | 782                                     | 14268                                                    | 107           | 17087                | 17788                |
| M77/1 416-GC4         | 60           | <i>P. limbata</i>                              | 16910                                     | 70        | 850                                                         | 60                                                                          | 65                                                                           | 16060                                                                       | 832                                     | 15228                                                    | 113           | 18275                | 18759                |
| M77/1 416-GC4         | 100          | <i>P. limbata</i>                              | 17690                                     | 80        | 1000                                                        | 70                                                                          | 70                                                                           | 16690                                                                       | 904                                     | 15786                                                    | 127           | 18842                | 19402                |
| M77/1 416-GC4         | 110          | <i>P. limbata</i>                              | 17560                                     | 80        | 1000                                                        | 70                                                                          | 70                                                                           | 16560                                                                       | 888                                     | 15672                                                    | 127           | 18747                | 19283                |
| M77/1 416-GC4         | 160          | <i>P. limbata</i>                              | 18080                                     | 90        | 1000                                                        | 70                                                                          | 70                                                                           | 17080                                                                       | 925                                     | 16155                                                    | 134           | 19146                | 19855                |
| M77/1 416-GC4         | 210          | <i>P. limbata</i>                              | 18610                                     | 80        | 1250                                                        | 100                                                                         | 70                                                                           | 17360                                                                       | 978                                     | 16382                                                    | 146           | 19447                | 20172                |
| M77/1 416-GC4         | 230          | <i>P. limbata</i>                              | 18970                                     | 80        | 1250                                                        | 100                                                                         | 70                                                                           | 17720                                                                       | 1045                                    | 16675                                                    | 146           | 19682                | 20481                |
| M77/1 416-GC4         | 245          | <i>P. limbata</i>                              | 19370                                     | 90        | 850                                                         | 90                                                                          | 110                                                                          | 18520                                                                       | 1094                                    | 17426                                                    | 168           | 20610                | 21664                |
| M77/1 416-GC4         | 250          | <i>P. limbata</i>                              | 19550                                     | 100       | 850                                                         | 90                                                                          | 110                                                                          | 18700                                                                       | 1058                                    | 17642                                                    | 174           | 20905                | 21919                |
| <i>M77/1 416-GC4</i>  | <i>290</i>   | <i>P. limbata</i>                              | <i>18930</i>                              | <i>90</i> | <i>850</i>                                                  | <i>90</i>                                                                   | <i>110</i>                                                                   | <i>18080</i>                                                                | <i>1133</i>                             | <i>16947</i>                                             | <i>168</i>    | <i>20040</i>         | <i>20853</i>         |
| M77/1 416-GC4         | 310          | <i>P. limbata</i>                              | 21050                                     | 130       | 850                                                         | 90                                                                          | 110                                                                          | 20200                                                                       | 994                                     | 19206                                                    | 193           | 22669                | 23716                |
| M77/1 416-GC4         | 345          | <i>P. limbata</i>                              | 22560                                     | 120       | 1400                                                        | 160                                                                         | 80                                                                           | 21160                                                                       | 964                                     | 20196                                                    | 215           | 23838                | 23838                |
| M77/1 406-MUC6        | 0-2          | Bulk $\text{C}_{\text{org}}$                   | 800                                       | 30        |                                                             |                                                                             |                                                                              |                                                                             | 652                                     | 148                                                      | 30            | 9                    | 275                  |
| M77/1 406-MUC6        | 5-8          | Bulk $\text{C}_{\text{org}}$                   | 1500                                      | 30        |                                                             |                                                                             |                                                                              |                                                                             | 652                                     | 848                                                      | 30            | 690                  | 882                  |
| <i>M77/1 406-MUC6</i> | <i>14-18</i> | <i>Bulk <math>\text{C}_{\text{org}}</math></i> | <i>8070</i>                               | <i>40</i> |                                                             |                                                                             |                                                                              |                                                                             | <i>691</i>                              | <i>7379</i>                                              | <i>40</i>     | <i>8043</i>          | <i>8320</i>          |

618

619

620

621

622

Table 3:

623

Mean pore densities (PD), standard deviations (SD) and standard errors of the mean (SEM) for the core top samples that have been used for the modern calibrations. Data includes all the four different methods that have been tested to determine foraminiferal PDs.

624

| Station                    | Mean PD after<br>Method #1<br>(P/ $\mu\text{m}^2$ ) | SD      | SEM     | Mean PD after<br>Method #2<br>(P/ $\mu\text{m}^2$ ) | SD      | SEM     | Mean PD after<br>Method #3<br>(P/ $\mu\text{m}^2$ ) | SD      | SEM     | Mean PD after<br>Method #4<br>(P/ $\mu\text{m}^2$ ) | SD      | SEM     |
|----------------------------|-----------------------------------------------------|---------|---------|-----------------------------------------------------|---------|---------|-----------------------------------------------------|---------|---------|-----------------------------------------------------|---------|---------|
| M77/1-<br>459/MUC-25       | 0.0049                                              | 0.00210 | 0.00148 | 0.0023                                              | 0.00051 | 0.00036 | 0.0016                                              | 0.00012 | 0.00009 | 0.0016                                              | 0.00012 | 0.00009 |
| M77/1-<br>487/MUC-39       | 0.0064                                              | 0.00042 | 0.00013 | 0.0055                                              | 0.00064 | 0.00019 | 0.0031                                              | 0.00030 | 0.00009 | 0.0030                                              | 0.00030 | 0.00009 |
| M77/1-<br>553/MUC-54       | 0.0062                                              | 0.00085 | 0.00025 | 0.0053                                              | 0.00045 | 0.00013 | 0.0031                                              | 0.00045 | 0.00013 | 0.0031                                              | 0.00052 | 0.00015 |
| M77/1-<br>565/MUC-60       | 0.0053                                              | 0.00045 | 0.00013 | 0.0033                                              | 0.00045 | 0.00014 | 0.0021                                              | 0.00029 | 0.00009 | 0.0021                                              | 0.00029 | 0.00009 |
| M77/2-<br>723/MUC-<br>47-3 | 0.0053                                              | 0.00060 | 0.00018 | 0.0043                                              | 0.00061 | 0.00018 | 0.0025                                              | 0.00037 | 0.00011 | 0.0025                                              | 0.00042 | 0.00013 |

625

626

627

628

629

630

631

632

633

634

635

Table 4:

637 Mean pore densities (PD) of *P. limbata*, calibrated ages (Cal. age) from the age model and reconstructed bottom  
 638 water O<sub>2</sub> concentrations ([O<sub>2</sub>]<sub>BW</sub>) for the downcore reconstructions in cores M77/1 406-MUC6 and M77/1 416-  
 639 GC4. All PDs were determined after method #4, except in the one sample in *italic* letters. In this sample  
 640 specimens were too small for size normalization and PD and [O<sub>2</sub>]<sub>BW</sub> were determined using method #3. Only  
 641 two specimens were found in 4.5 cm depth. PDs and reconstructed [O<sub>2</sub>]<sub>BW</sub> are listed here for each individual  
 642 instead as mean values for the whole sample. SD = Standard deviation; SEM = Standard error of the mean.

| Core name             | Depth (cm) | Cal. age (yr BP) | SD         | PD (P/μm <sup>2</sup> ) | SD             | SEM            | [O <sub>2</sub> ] <sub>BW</sub> (μmol/kg) | SEM     |
|-----------------------|------------|------------------|------------|-------------------------|----------------|----------------|-------------------------------------------|---------|
| M77/1 406-MUC6        | 0.5        | 86               | 42         | 0.0027                  | 0.00024        | 0.00011        | 5.7                                       | 1.3     |
| M77/1 406-MUC6        | 1.5        | 252              | 90         | 0.0027                  | 0.00013        | 0.00005        | 6.0                                       | 1.0     |
| M77/1 406-MUC6        | 2.5        | 361              | 100        | 0.0024                  | 0.00038        | 0.00019        | 7.5                                       | 1.6     |
| <i>M77/1 406-MUC6</i> | 3.5        | <i>461</i>       | <i>102</i> | <i>0.0029</i>           | <i>0.00024</i> | <i>0.00014</i> | 4.8                                       | 1.8     |
| M77/1 406-MUC6        | 4.5        | 559              | 96         | 0.0026                  | *              | *              | 6.3                                       | 2.4(SD) |
| M77/1 406-MUC6        | 4.5        | 559              | 96         | 0.0023                  | *              | *              | 8.3                                       | 2.2(SD) |
| M77/1 406-MUC6        | 7.6        | 1010             | 291        | 0.0022                  | 0.00019        | 0.00010        | 8.5                                       | 1.2     |
| M77/1 416-GC4         | 20.0       | 17432            | 203        | 0.0017                  | 0.00022        | 0.00009        | 11.5                                      | 1.0     |
| M77/1 416-GC4         | 30.0       | 17721            | 209        | 0.0016                  | 0.00024        | 0.00011        | 12.1                                      | 1.1     |
| M77/1 416-GC4         | 40.0       | 17943            | 196        | 0.0016                  | 0.00011        | 0.00005        | 12.6                                      | 0.8     |
| M77/1 416-GC4         | 50.0       | 18165            | 179        | 0.0017                  | 0.00018        | 0.00008        | 11.8                                      | 1.0     |
| M77/1 416-GC4         | 55.0       | 18288            | 161        | 0.0019                  | 0.00034        | 0.00015        | 10.3                                      | 1.3     |
| M77/1 416-GC4         | 65.0       | 18524            | 124        | 0.0017                  | 0.00026        | 0.00012        | 11.7                                      | 1.1     |
| M77/1 416-GC4         | 70.0       | 18582            | 120        | 0.0016                  | 0.00012        | 0.00006        | 12.2                                      | 1.0     |
| M77/1 416-GC4         | 75.0       | 18636            | 116        | 0.0015                  | 0.00020        | 0.00010        | 13.0                                      | 1.1     |
| M77/1 416-GC4         | 85.0       | 18737            | 108        | 0.0024                  | 0.00029        | 0.00013        | 7.6                                       | 1.3     |
| M77/1 416-GC4         | 90.0       | 18792            | 103        | 0.0017                  | 0.00030        | 0.00014        | 11.5                                      | 1.2     |
| M77/1 416-GC4         | 100.0      | 18922            | 85         | 0.0016                  | 0.00016        | 0.00007        | 12.1                                      | 1.0     |
| M77/1 416-GC4         | 110.0      | 19105            | 104        | 0.0018                  | 0.00012        | 0.00005        | 11.3                                      | 1.0     |
| M77/1 416-GC4         | 120.0      | 19191            | 107        | 0.0019                  | 0.00025        | 0.00012        | 10.5                                      | 1.3     |
| M77/1 416-GC4         | 135.0      | 19286            | 114        | 0.0019                  | 0.00014        | 0.00006        | 10.7                                      | 1.0     |
| M77/1 416-GC4         | 140.0      | 19318            | 117        | 0.0020                  | 0.00021        | 0.00009        | 10.1                                      | 1.1     |
| M77/1 416-GC4         | 150.0      | 19383            | 123        | 0.0020                  | 0.00031        | 0.00014        | 10.2                                      | 1.2     |
| M77/1 416-GC4         | 160.0      | 19467            | 132        | 0.0019                  | 0.00027        | 0.00012        | 10.8                                      | 1.2     |
| M77/1 416-GC4         | 180.0      | 19625            | 129        | 0.0020                  | 0.00043        | 0.00019        | 10.2                                      | 1.5     |



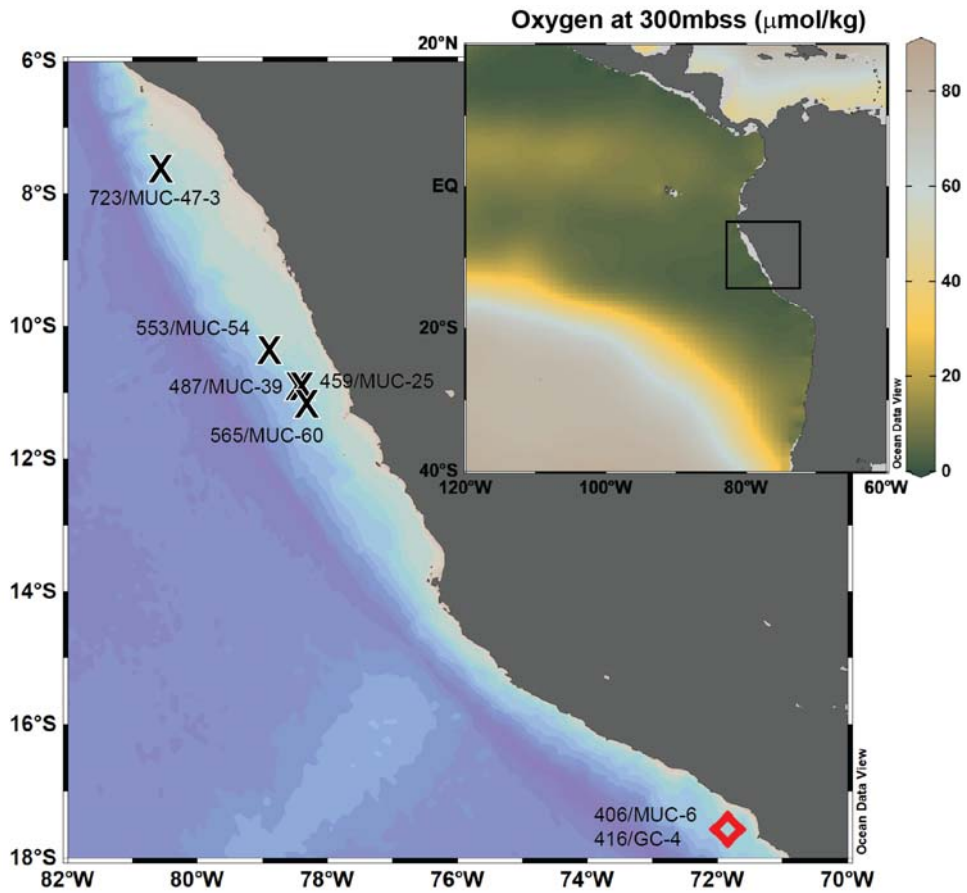

644

645 **Figure 1:** Map with sampling locations together with dissolved oxygen concentration at 300  
 646 mbss in the Southeastern Pacific Ocean (inset map). Data is obtained from World Ocean Atlas  
 647 2018<sup>57</sup>. Black crosses indicate the locations of MUC samples used for the core top calibration  
 648 of PD vs  $[\text{O}_2]_{\text{BW}}$ . Red diamond shows the location of sediment cores M77/1-406/MUC-6 and  
 649 M77/1-416/GC-4) used for the paleoreconstruction of  $[\text{O}_2]_{\text{BW}}$ . Prepared using Ocean Data  
 650 View<sup>61</sup>.

651

652

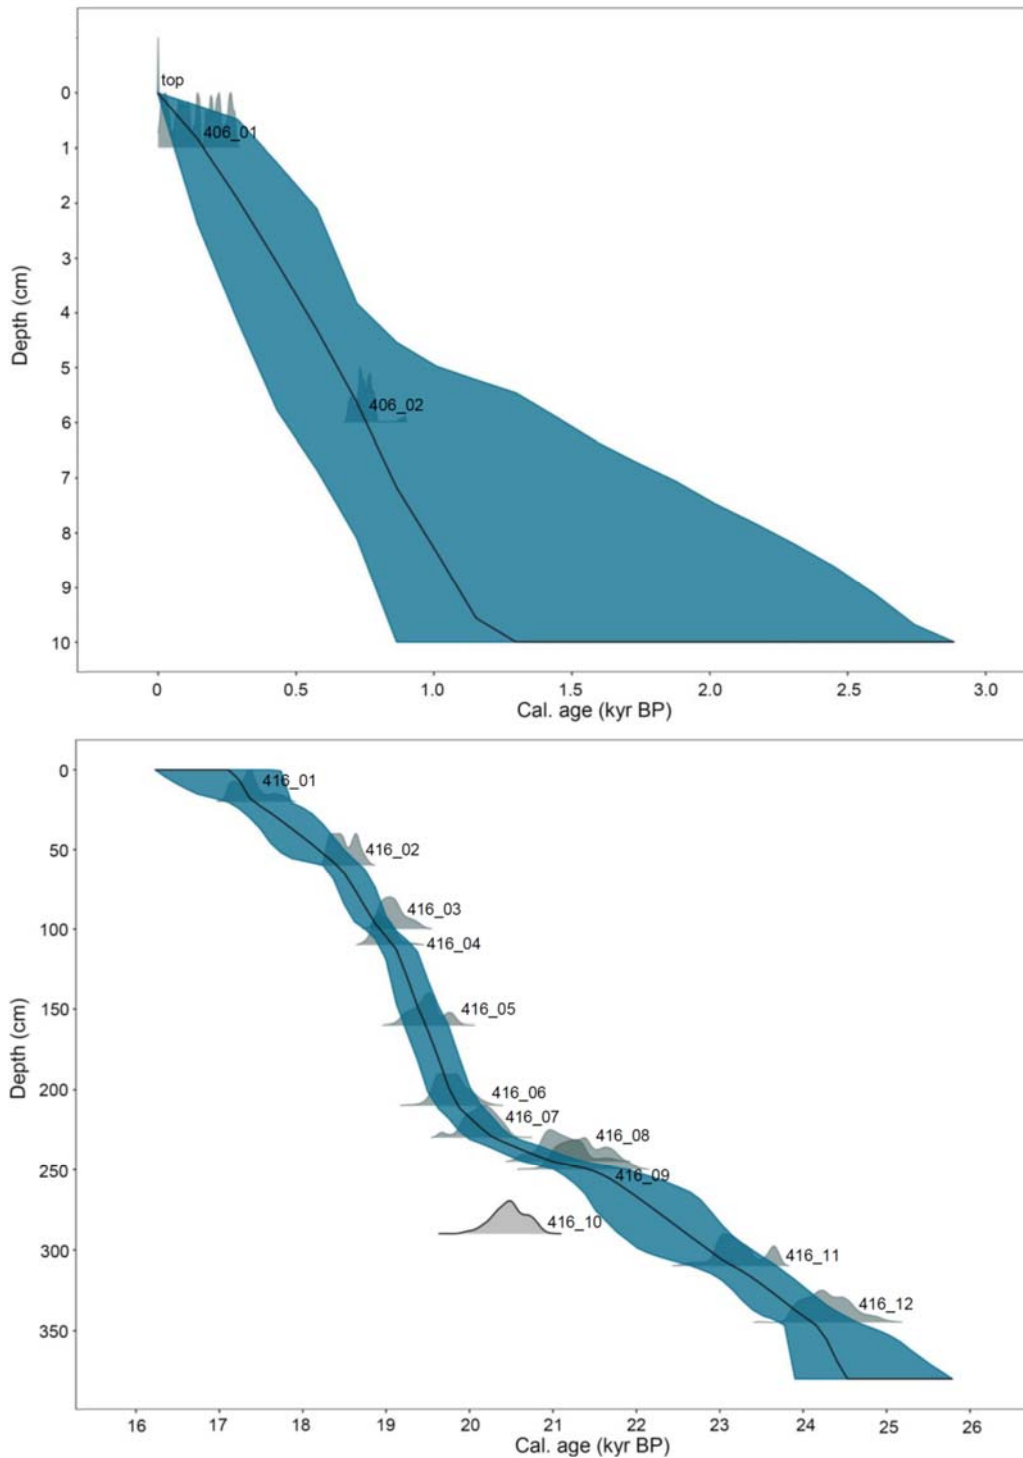

654

655 **Figure 2:** Age depth models for cores M77/1 406-MUC6 (A) and M77/1 416-GC4 (B). These  
 656 models are based on  $^{14}\text{C}$  dating and have been modeled using the Bchron software package<sup>36</sup>.  
 657 Error bands show 95% confidence intervals. The probability distributions and highest density  
 658 regions are shown for the  $^{14}\text{C}$  age of each analyzed sample. Note that sample 416\_10 has been  
 659 excluded from the age model as an outlier (age reversal).

660

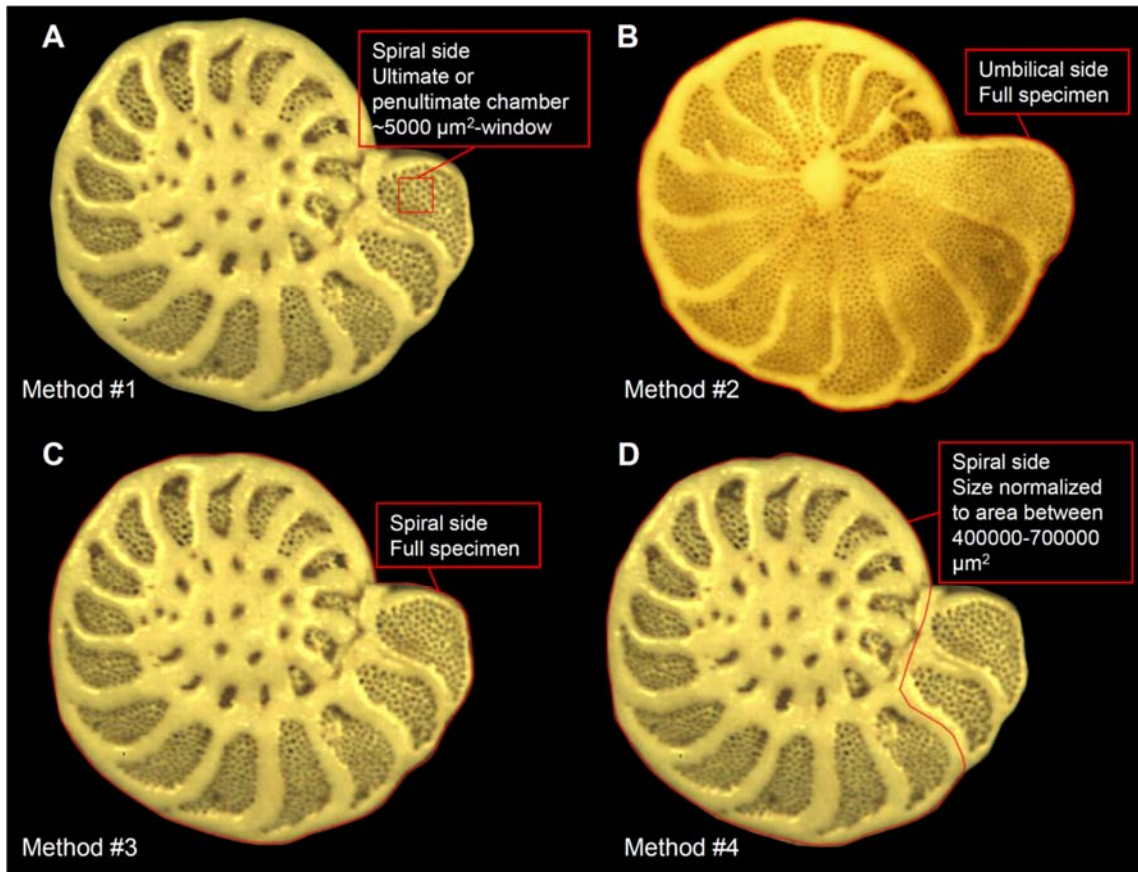

662

663 **Figure 3:** Visual description of the four methods that have been compared to determine the  
 664 PD of *Planulina limbata*. For a detailed description of these methods see text. A: Method #1;  
 665 B: Method #2; C: Method #3; D: Method #4.

666

667

668

669

670

671

672

673

674

675

676

677

678

679

680

681

682

683

684

685

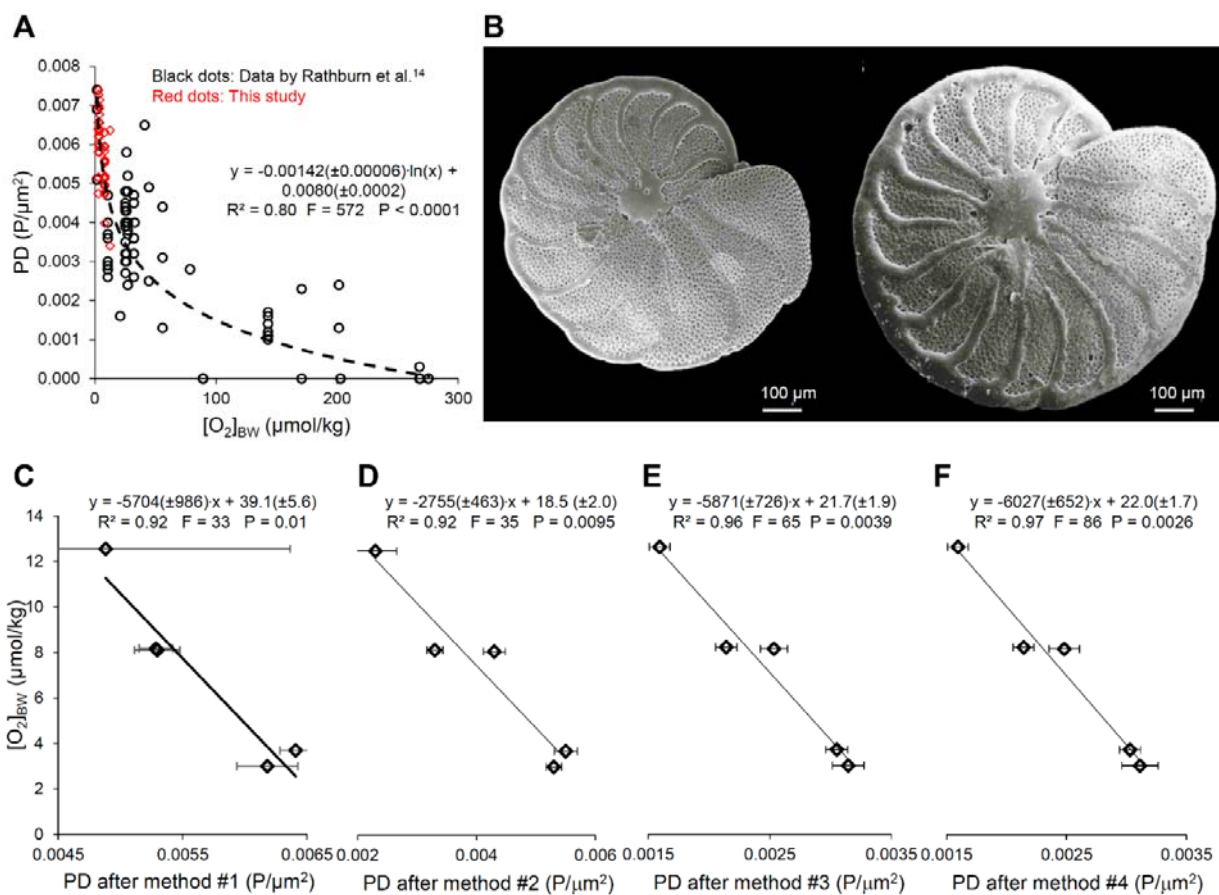

686 **Figure 4:** **A:** Comparison of epifaunal PD vs.  $[\text{O}_2]_{\text{BW}}$  correlation between our study (red dots) and Rathburn et al.<sup>15</sup> (Black dots). PDs of each individual foraminiferal specimen  
 687 are plotted. All PDs in this plot were determined after method #1. The dashed line is a logarithmic regression through all data points (Equation and statistics are shown in figure).  
 688 **B:** Scanning electron micrographs of two epifaunal *Planulina limbata* specimens (umbilical side) with different porosity features. Specimen A (higher porosity) is from M77/1-  
 689 487/MUC-39 ( $[\text{O}_2]_{\text{BW}} = 3.70 \mu\text{mol/kg}$ ); Specimen B (Lower porosity) is from M77/1-565/MUC-60 ( $[\text{O}_2]_{\text{BW}} = 8.17 \mu\text{mol/kg}$ ). **C-F:** Comparison of the four methods that have been  
 690 tested to determine the correlation between  $[\text{O}_2]_{\text{BW}}$  and the mean the PD of *Planulina limbata* in each sample. For a detailed description of these methods see text. C: Method #1;  
 691 D: Method #2; E: Method #3; F: Method #4. Solid lines are linear regressions (Equation and statistics are shown in figure). Error bars are the standard error of the mean (1SEM).

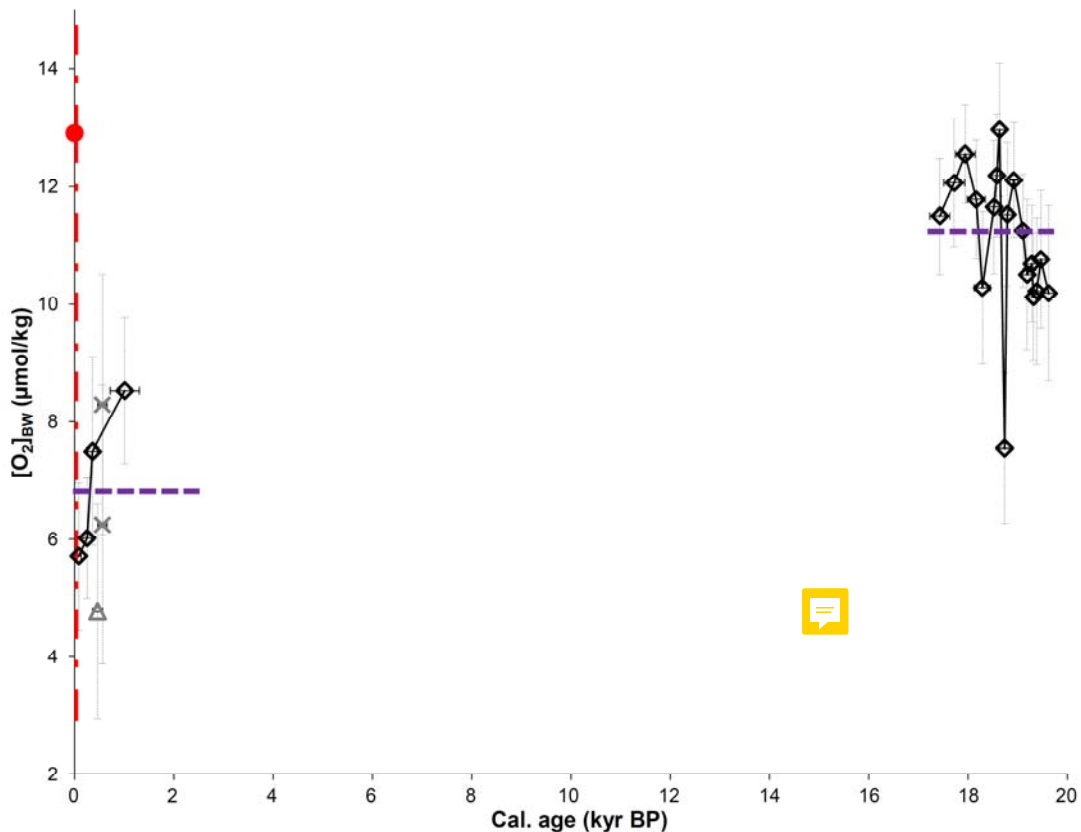

692

693 **Figure 5:** Quantitative palaeorecord of mean  $[O_2]_{BW}$  in cores M77/1 406-MUC6 and M77/1  
 694 416-GC4 using the PD of *Planulina limbata*. Note that the slice during the Late Holocene (LH)  
 695 is from M77/1 406-MUC6 and the slice from the Last Glacial Maximum (LGM) from core  
 696 M77/1 416-GC4. All PDs were determined after method #4, except in the one sample plotted  
 697 as a grey triangle. In this sample specimens were too small for size normalization and PD and  
 698  $[O_2]_{BW}$  were determined using method #3. Since only two specimens were found in one sample  
 699 each individual reconstructed  $[O_2]_{BW}$  instead of mean values were plotted as grey crosses.  
 700 Horizontal errors are the standard deviation (1SD). Vertical error bars are standard error of the  
 701 mean (1SEM) except for the grey crosses (1SD). Mean modern  $[O_2]_{BW}$  in this region is highly  
 702 variable in this region (range from 1-25  $\mu\text{mol/kg}^{55-58}$ ). The red dot represents the mean modern  
 703  $[O_2]_{BW}$  (red dashed line = 1SD). Note that all the reconstructed  $[O_2]_{BW}$  are within the range of  
 704 short time modern variability. Purple dashed lines indicate the mean  $[O_2]_{BW}$  during the LH and  
 705 the LGM.

706

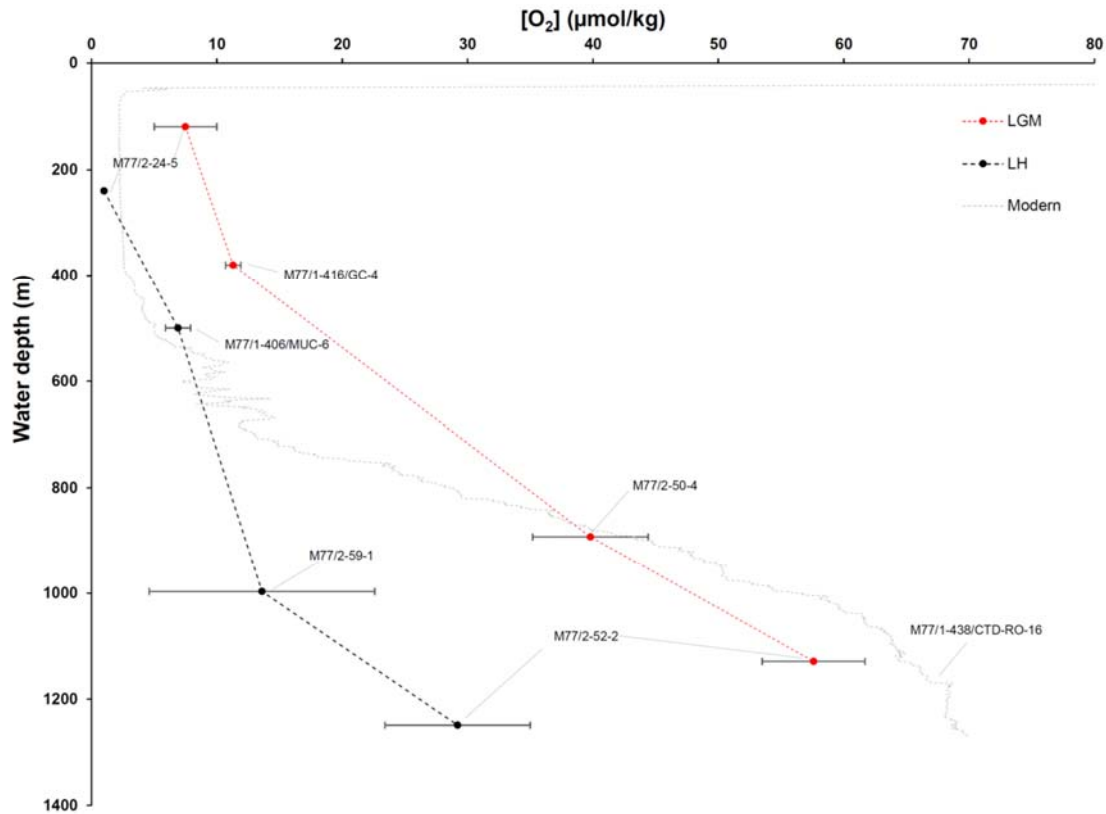

707

708 **Figure 6:**  $[O_2]_{BW}$  reconstructed with different approaches for different depths at the Peruvian  
 709 OMZ during the LGM (red) and the LH (Black). Data at 1000 – 1250 m is from Erdem et al.<sup>12</sup>,  
 710 at ~500 m from this study and ~240 m from Scholz et al.<sup>13</sup>. Modern data is from 11°S M77/1-  
 711 438/CTD-RO-16<sup>55</sup>. Note that water depths during the LGM have all been corrected by the lower  
 712 sea level of ~120 m<sup>45</sup>. Datapoints for our data and Erdem et al.<sup>12</sup> are the weighted mean for  
 713 each time slice and error bars are the standard error for the weighted mean. Scholz et al.<sup>13</sup>  
 714 indicated a range of 5-10  $\mu\text{mol/kg}$  for the LGM (shown here as  $7.5 \pm 2.5 \mu\text{mol/kg}$ ). The data  
 715 for the LH from Scholz et al.<sup>13</sup> was calculated after their figure 1b and indicated always anoxic  
 716 conditions (here shown as 1  $\mu\text{mol/kg}$  without error bar).

# Oxygen at 300mbss ( $\mu\text{mol/kg}$ )

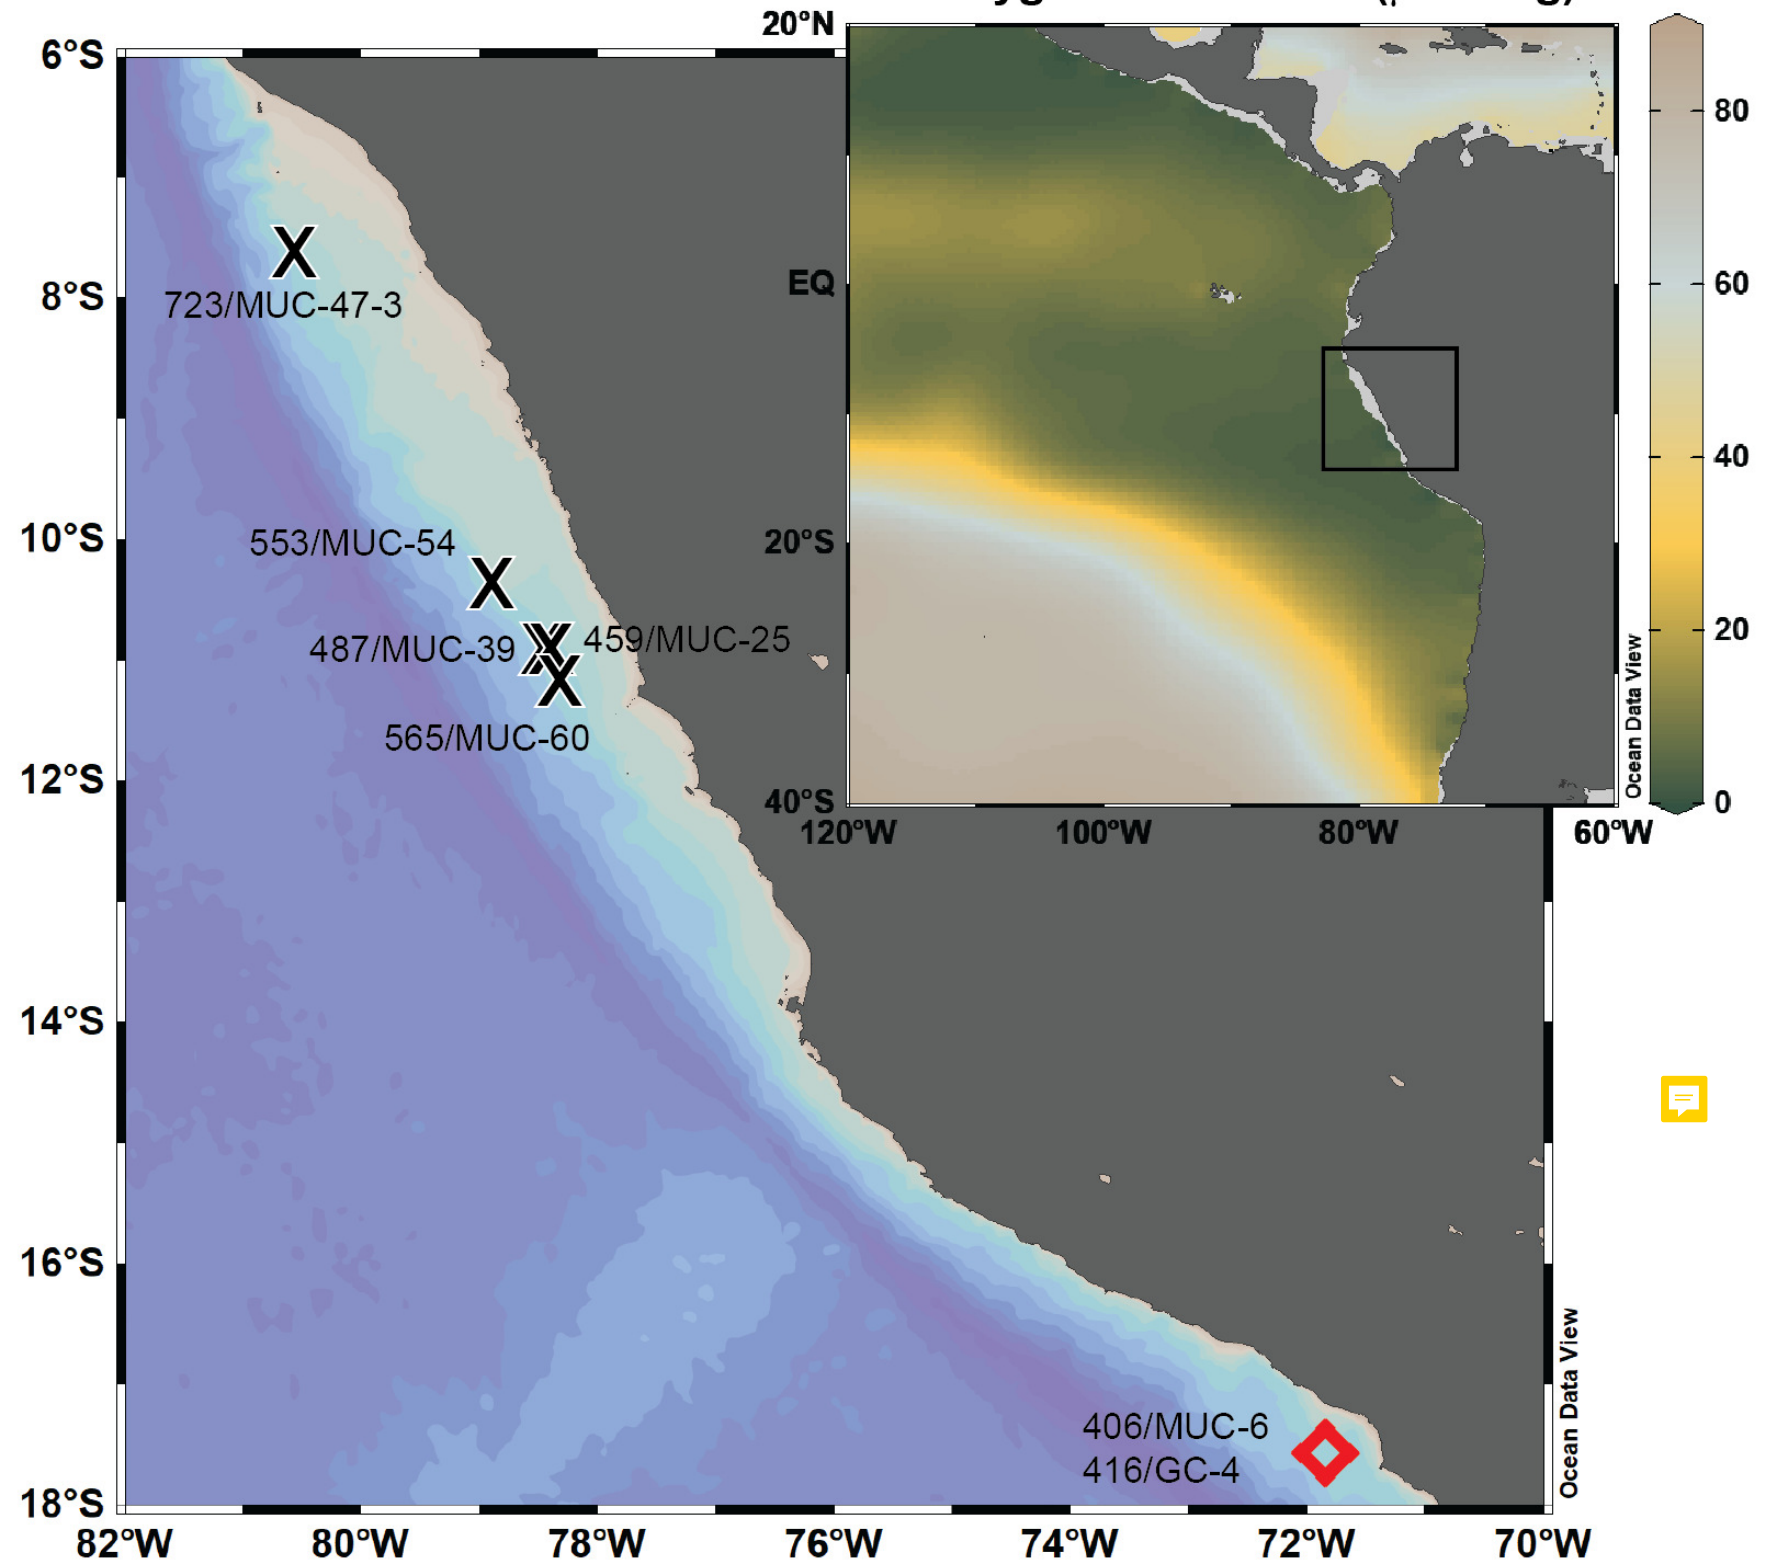

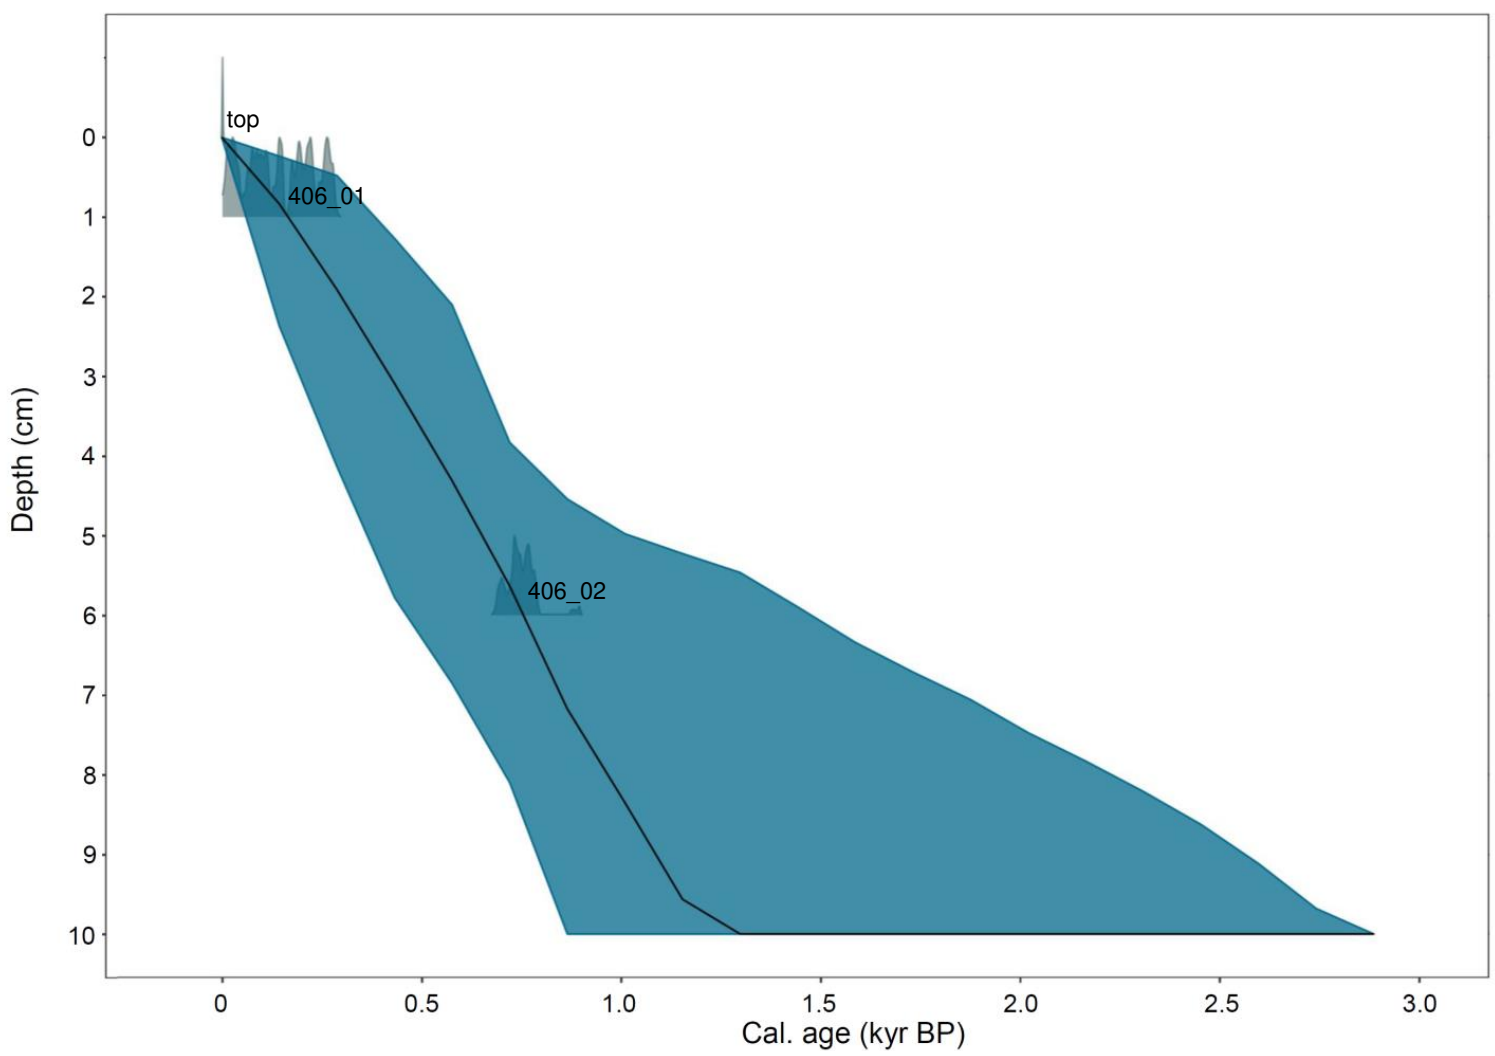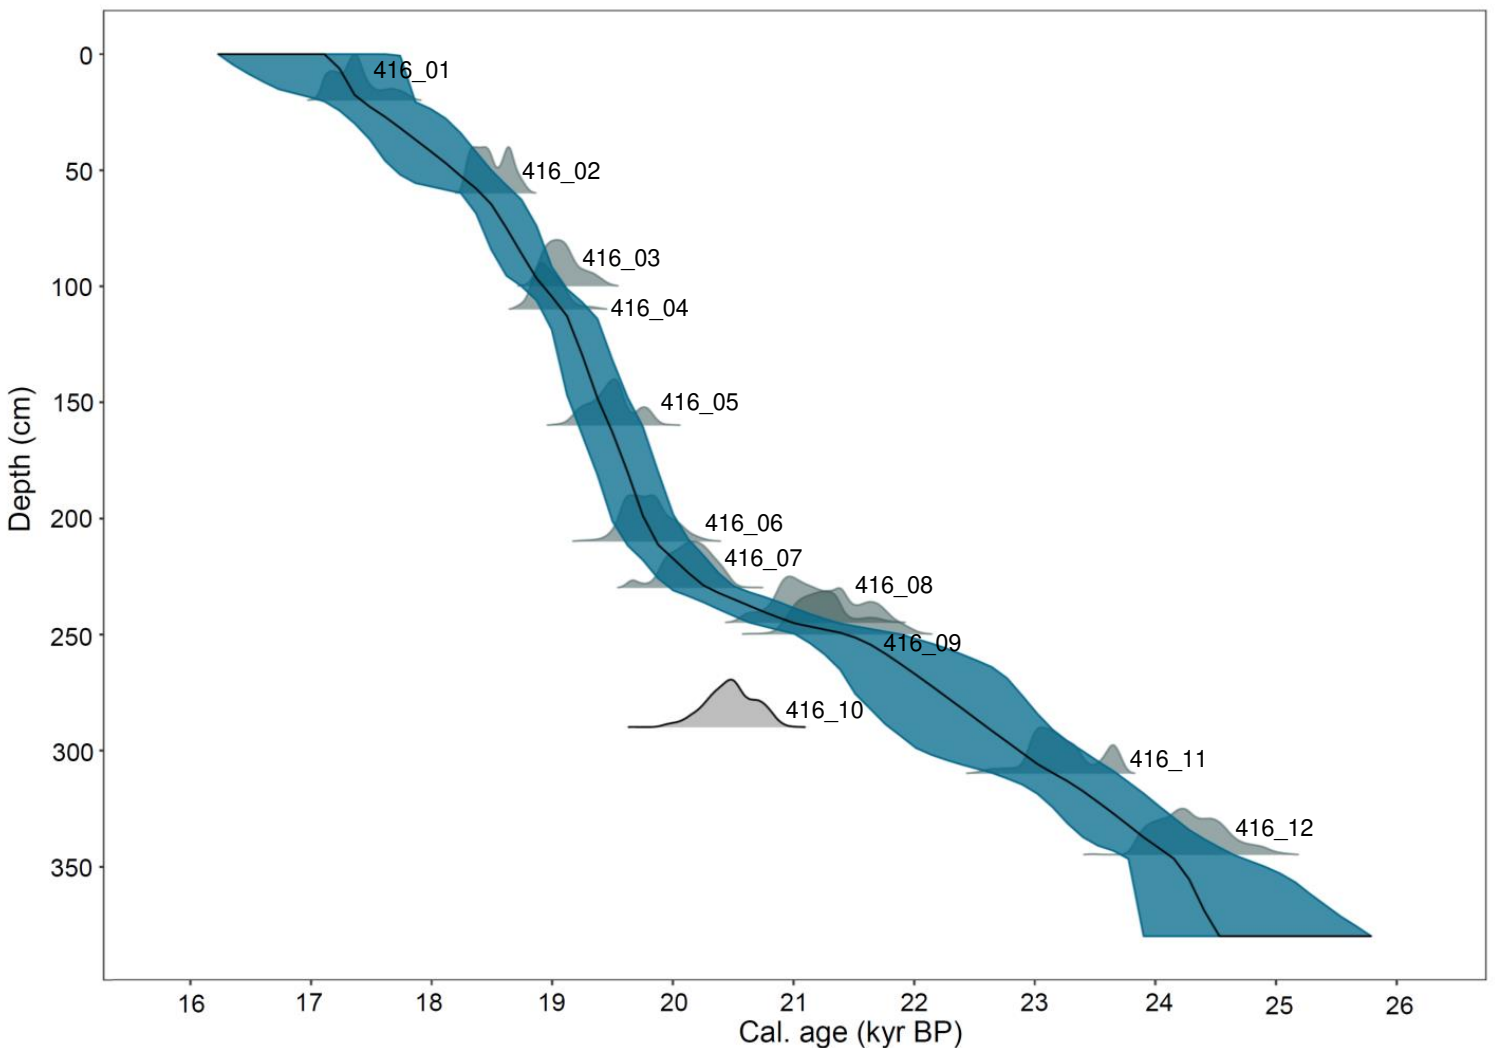



**A**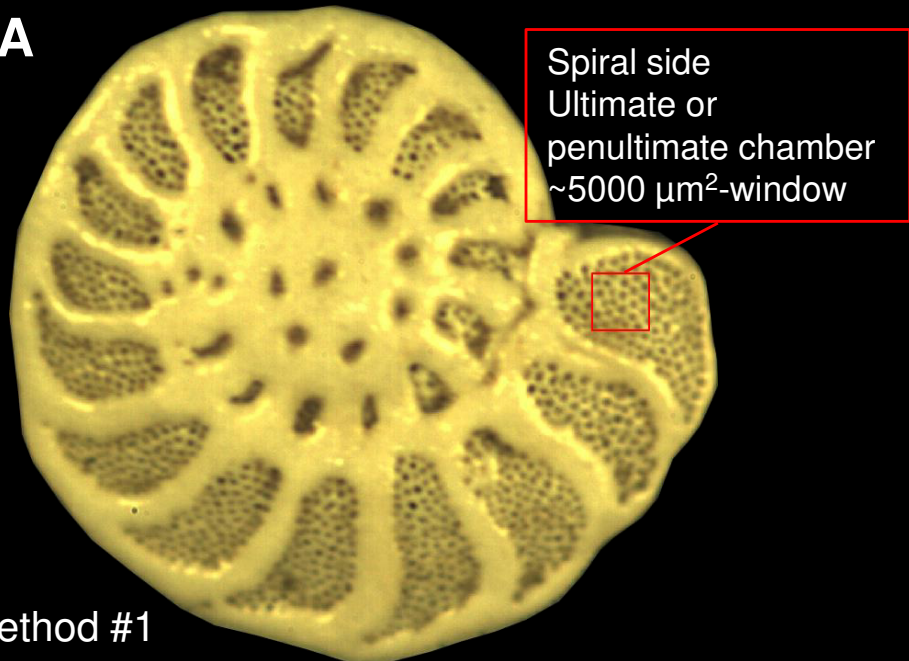

Method #1

**B**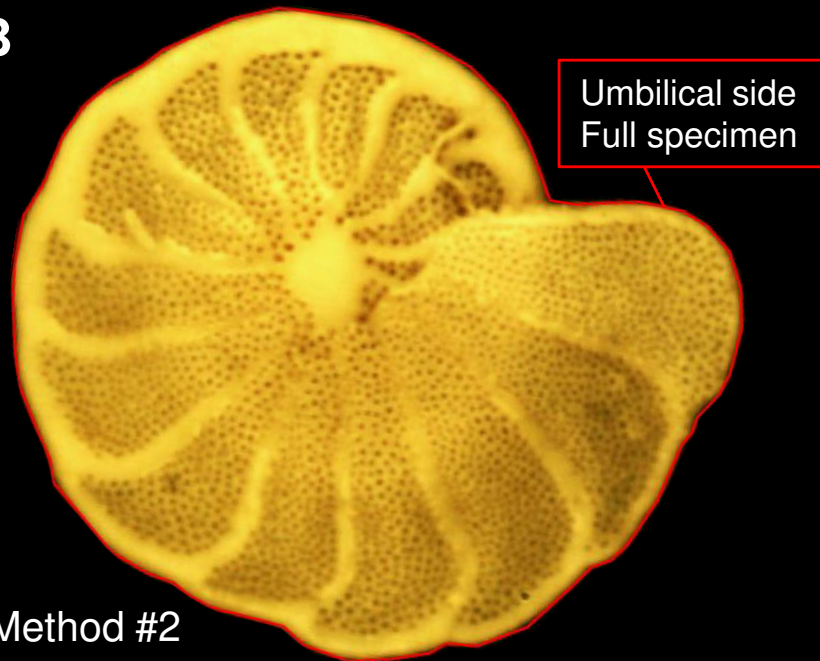

Method #2

**C**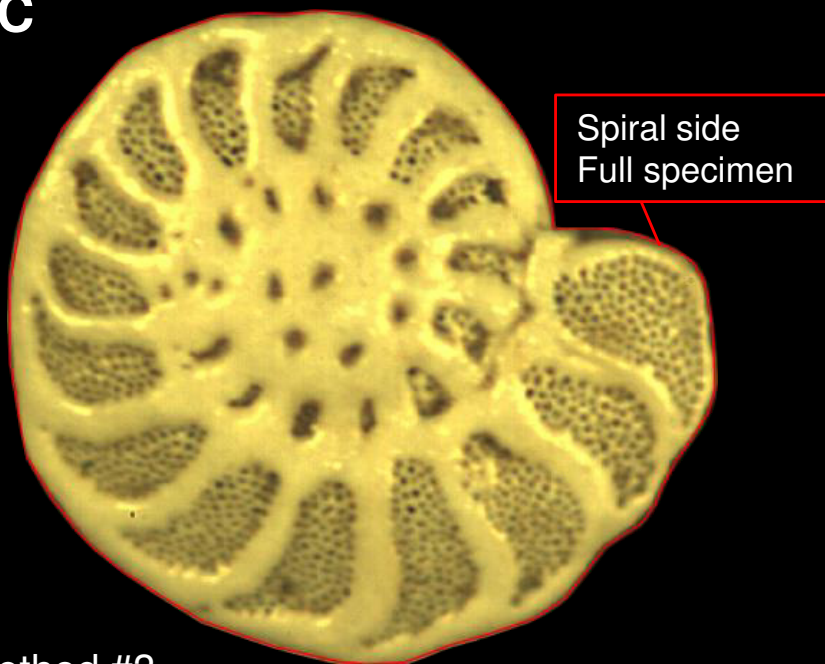

Method #3

**D**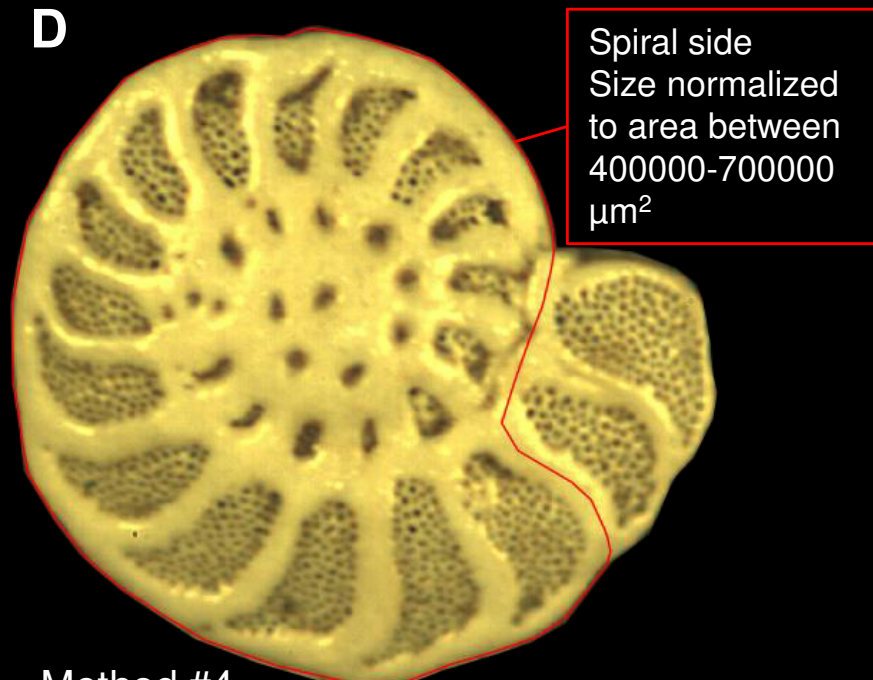

Method #4

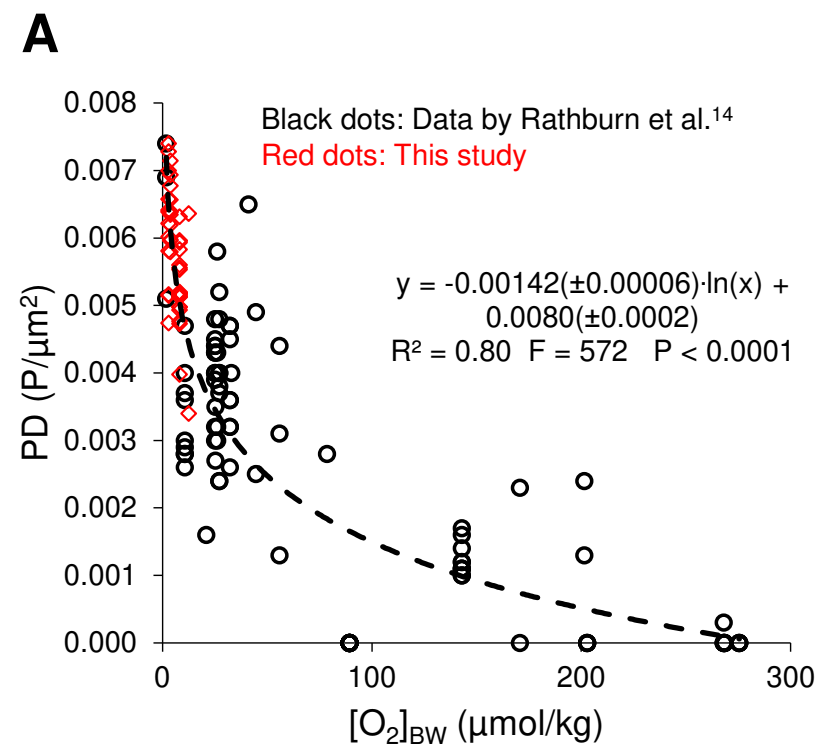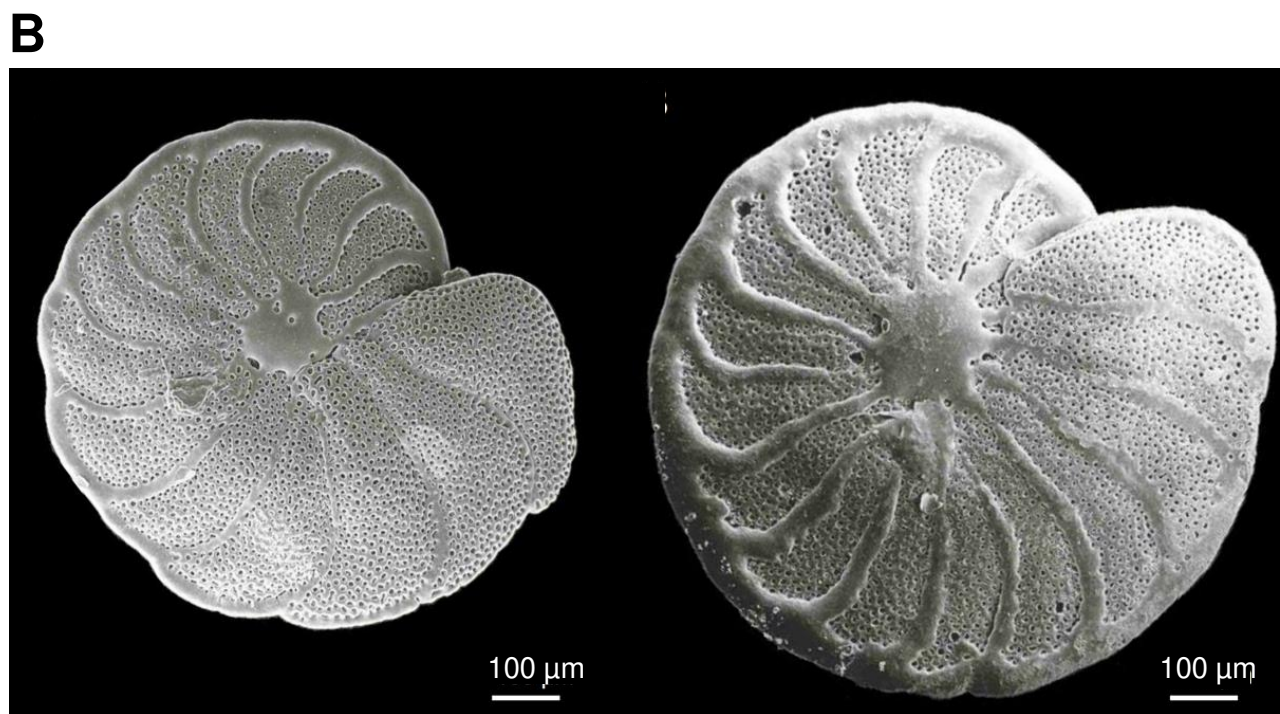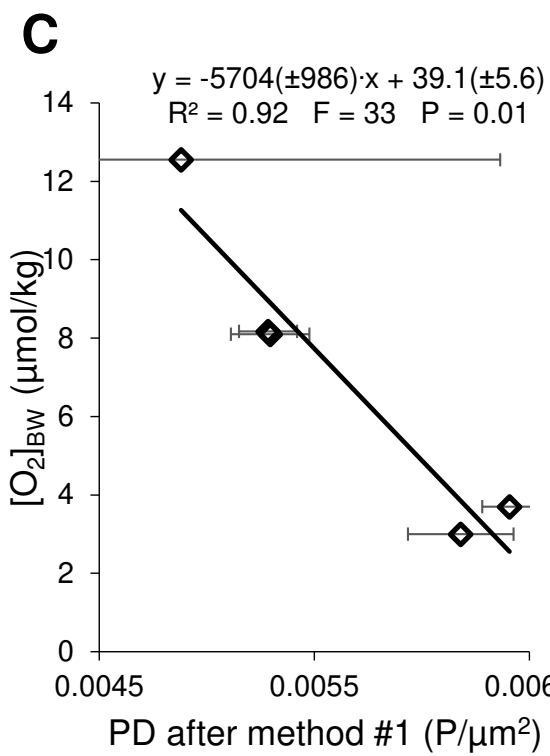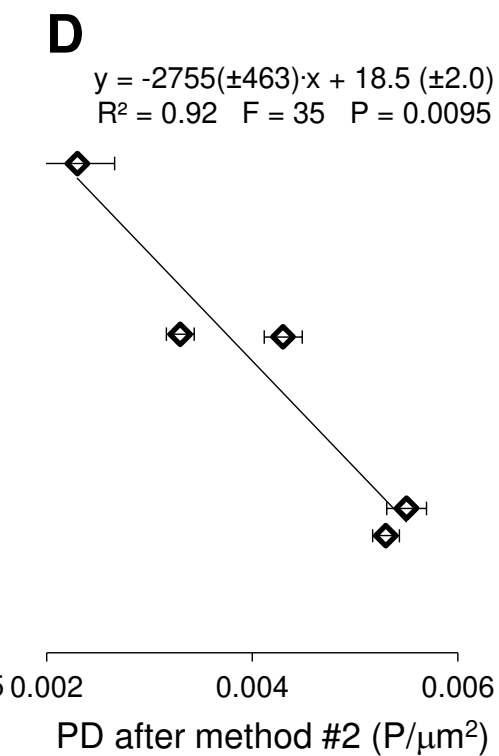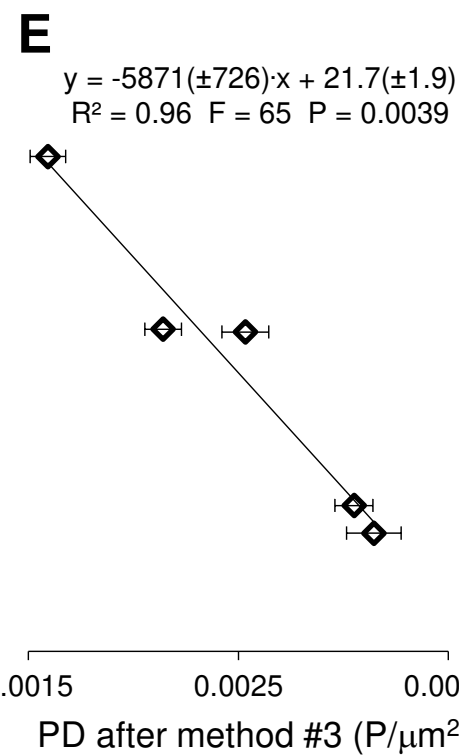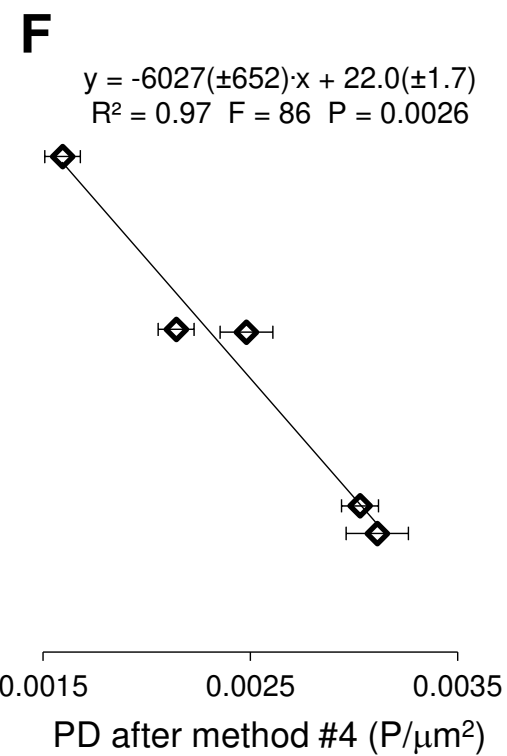

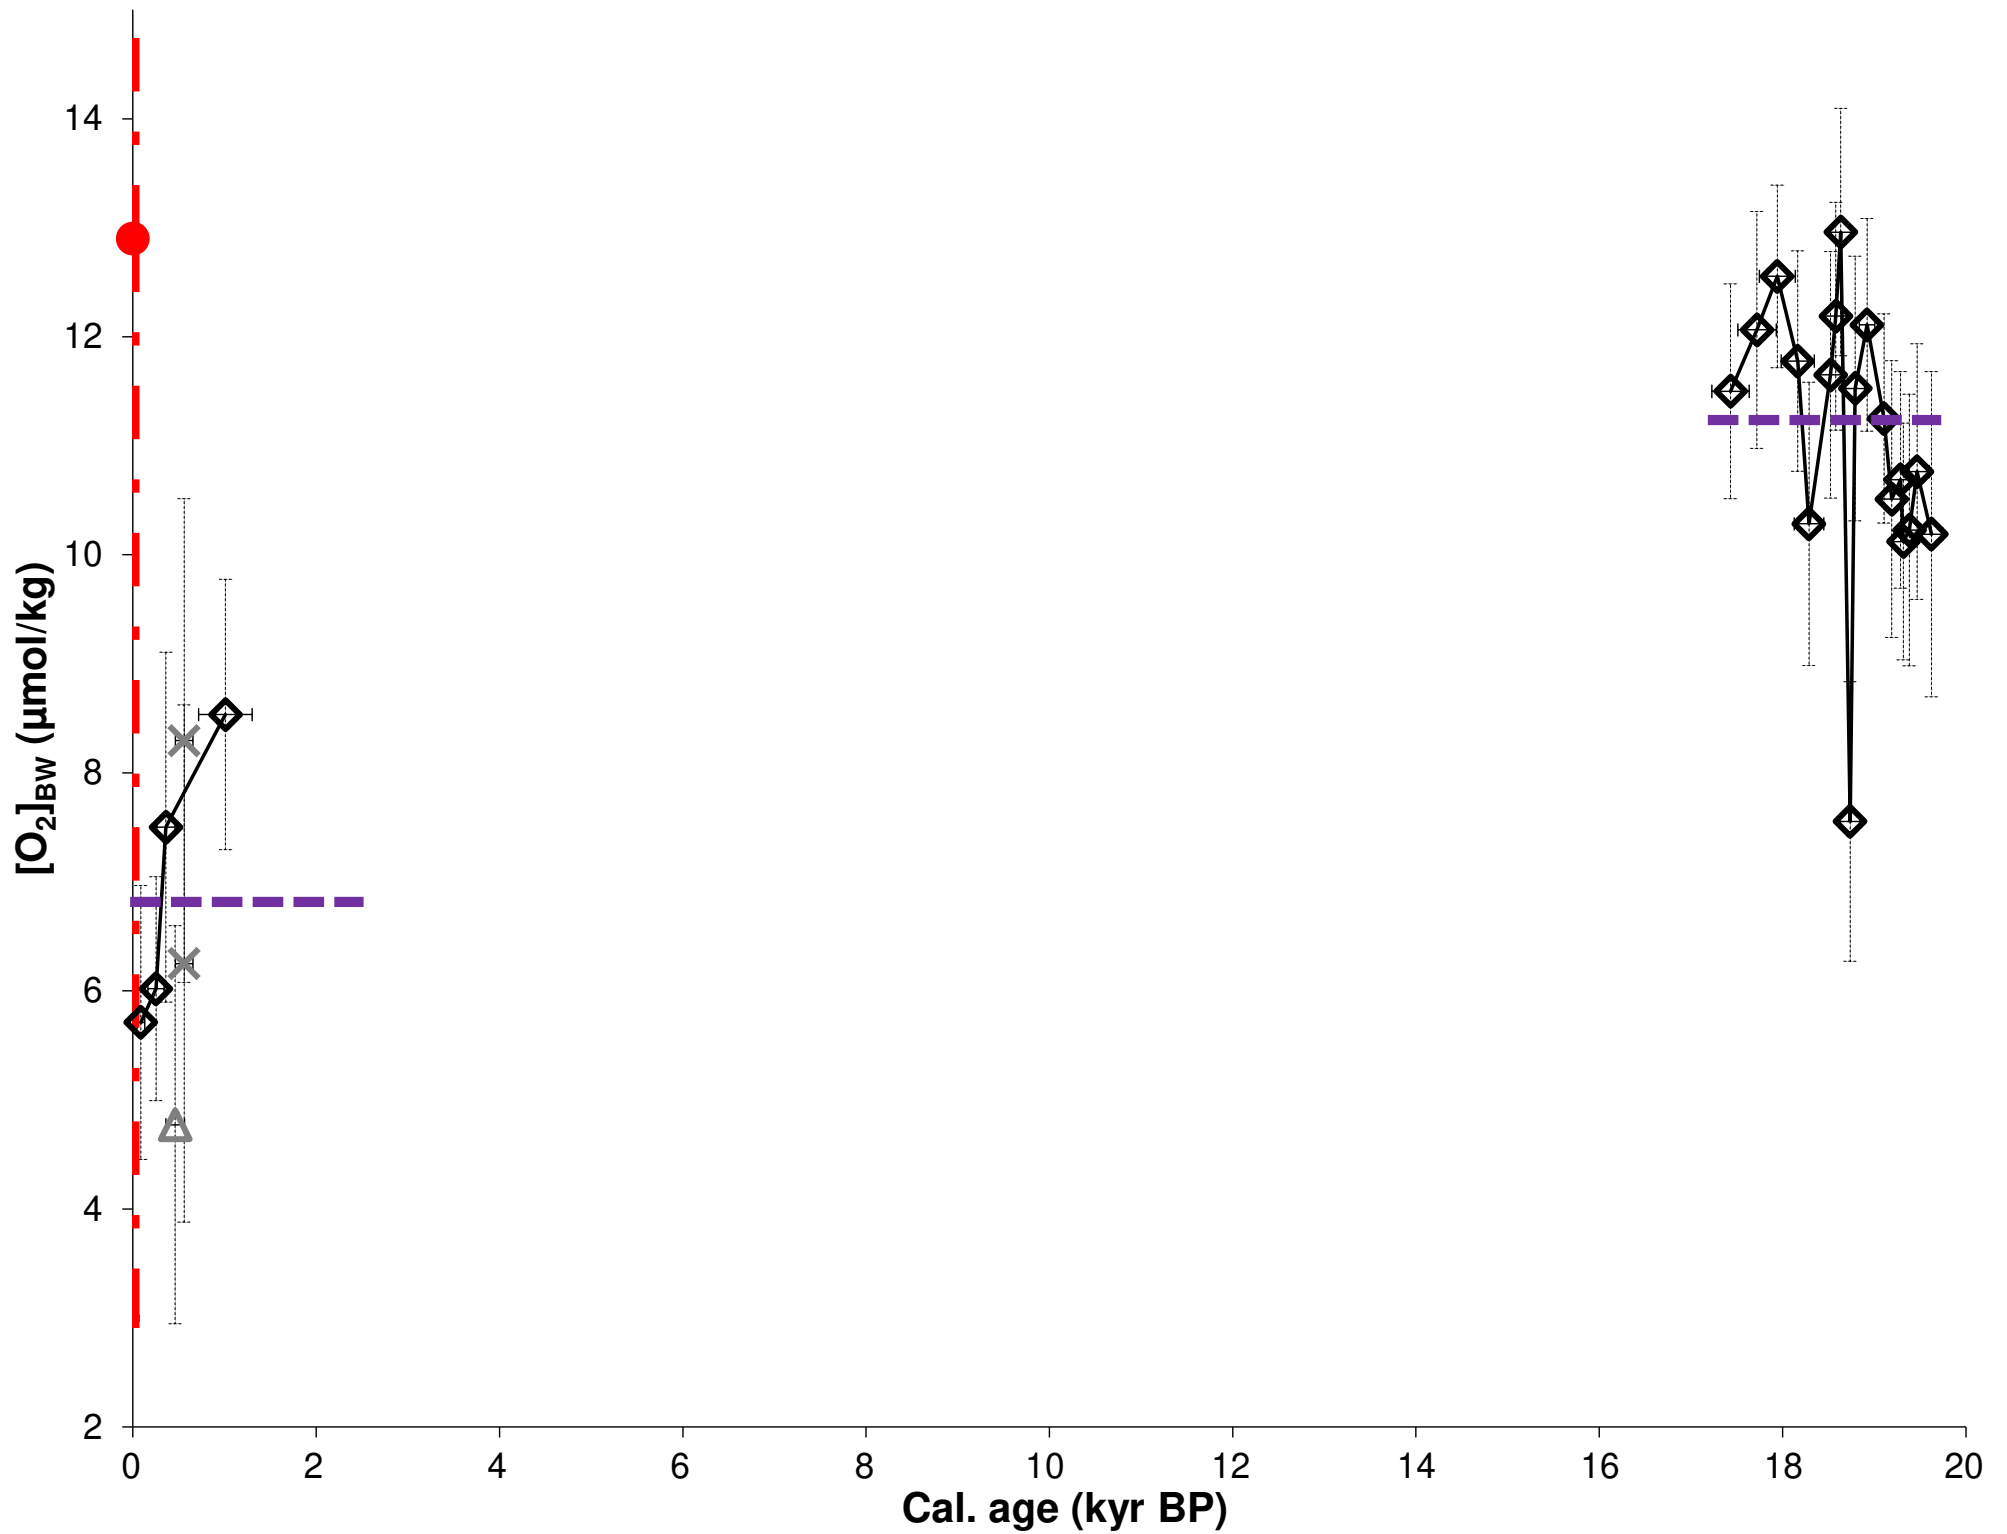

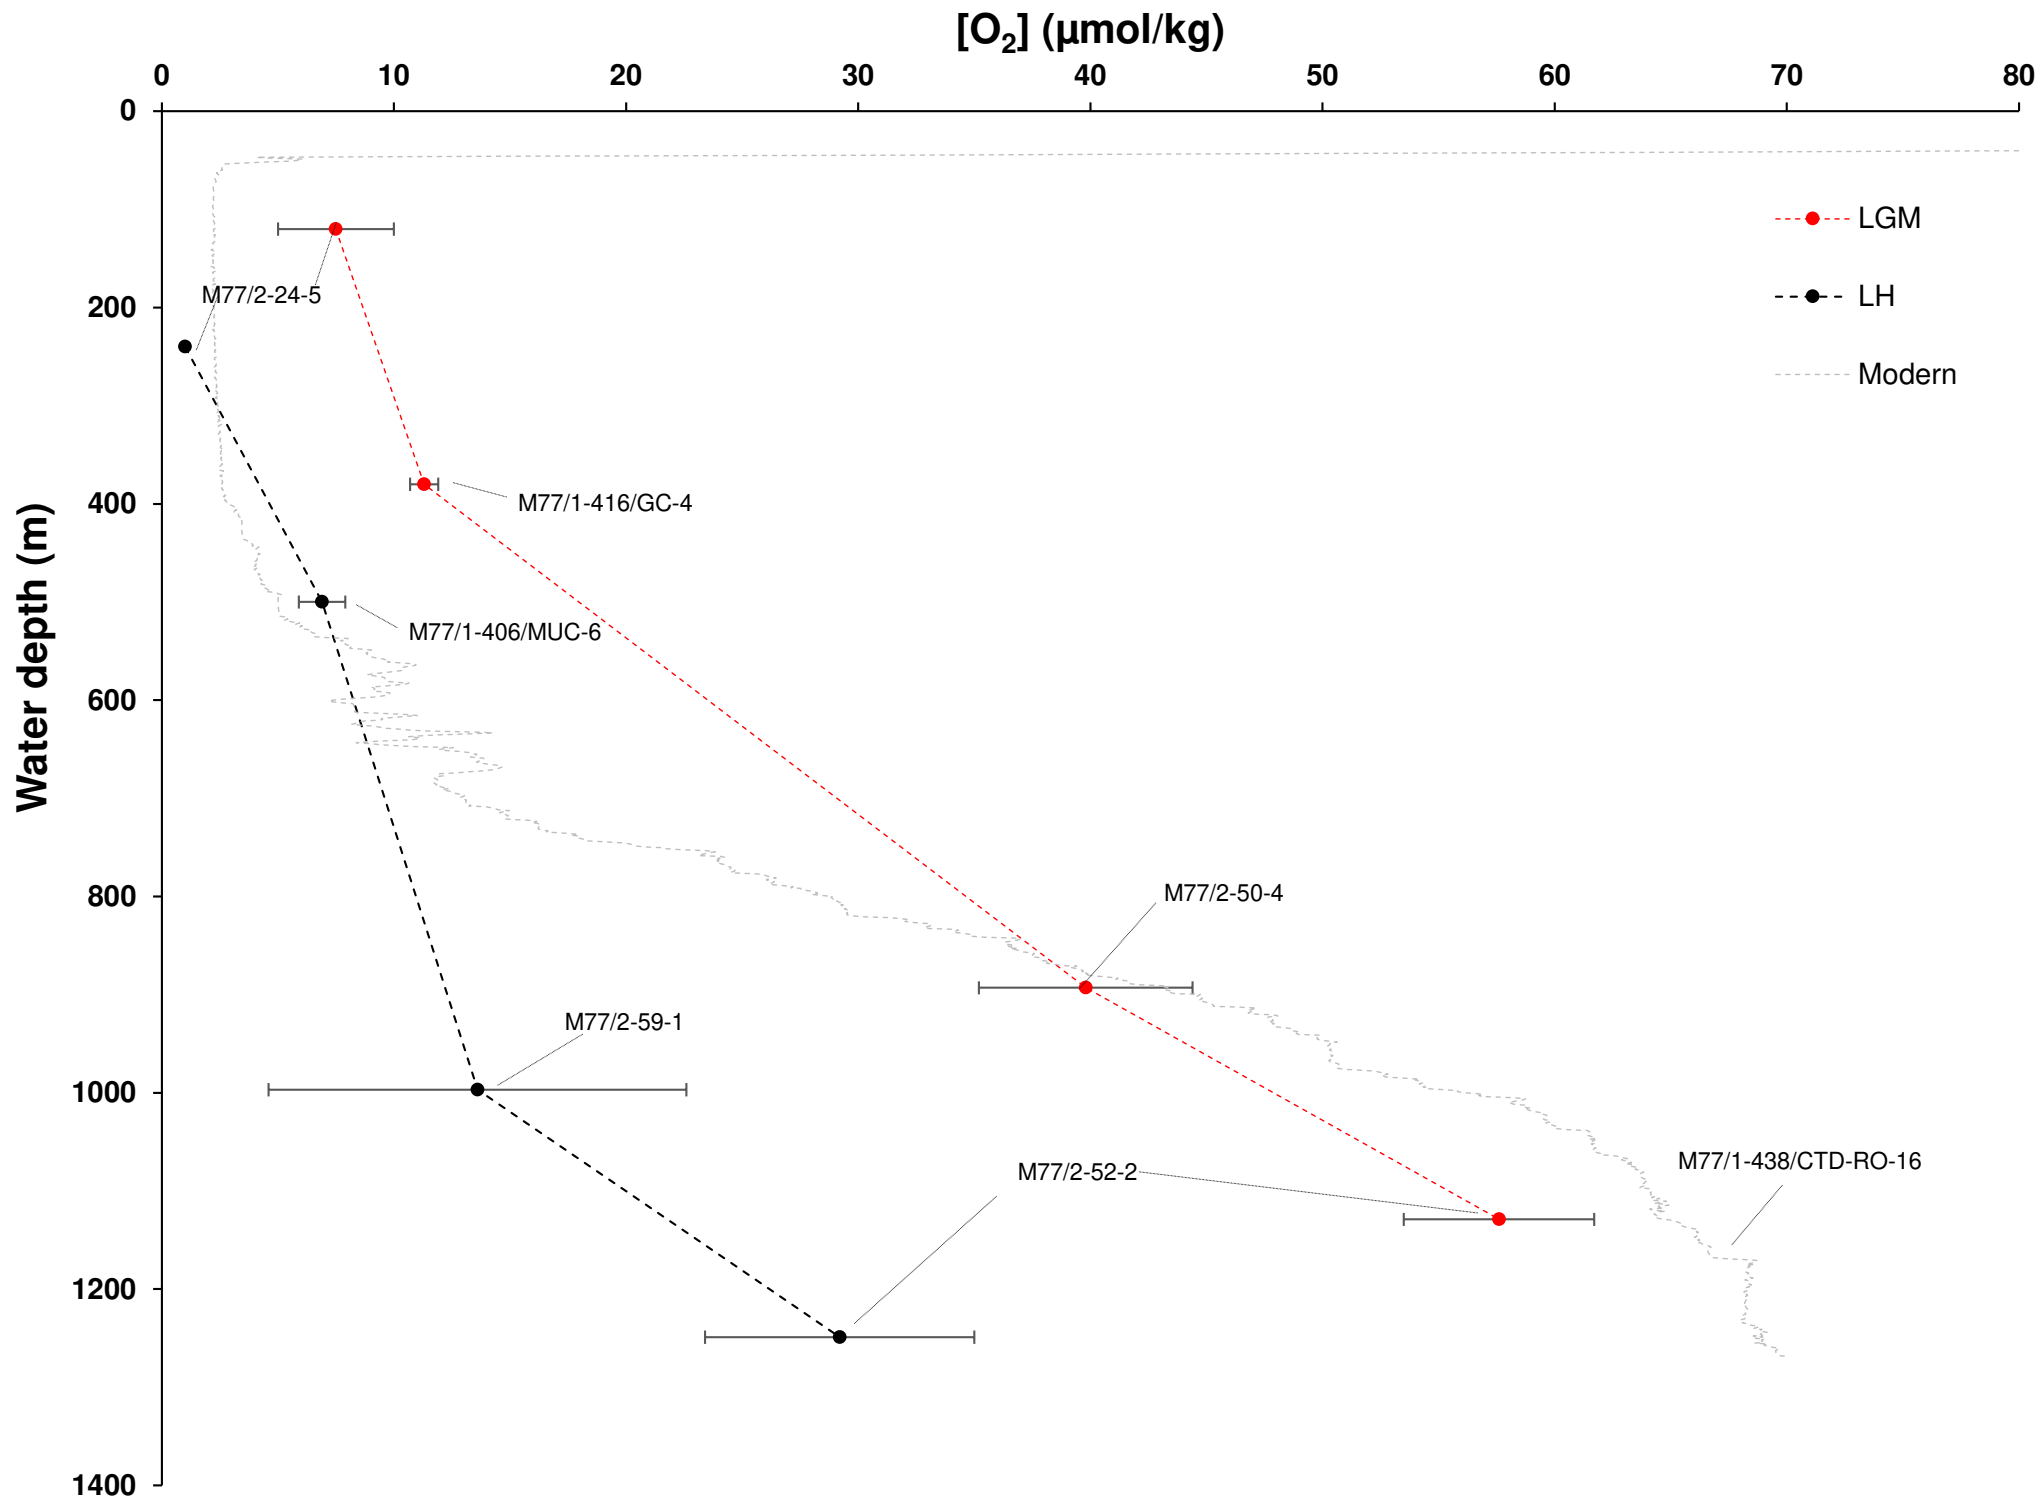

## Rebuttal letter to the reviewers

We were really glad to receive such positive feedbacks by all of the three reviewers. The reviews were all really constructive and we think our manuscript has significantly improved by following the suggestions of the reviewers. In the revised version of our manuscript, we considered all their suggestions. Below, you can find a point by point response to the points of revisions.

### REVIEWER COMMENTS:

#### Reviewer #1 (Remarks to the Author):

**R1:** The manuscript by Glock et al., aims to reconstruct shallow-intermediate water (~500 m) oxygenation in the Peruvian OMZ during time slices from the LGM and Late Holocene (LH). They first present several new calibrations of the pore density oxygen proxy for the foraminifer *limbata* from the Peruvian margin. These are compared and then applied to reconstruct oxygenation in the region. By combining this new data with previously published neighboring records the authors are able to convincingly show a present but weakened OMZ along the Peruvian margin in the LGM as compared to the LH. The manuscript is well-written and well-constructed. I could see the newly presented calibration being used in similar studies and the findings contribute to an important and rapidly evolving discussion of deglacial OMZ evolution on the Pacific margin.

My only major comment is in regards to the difference in inferred shape of the OMZ at present as compared to the LH (just 1-0 kya!). This is seen most clearly in Figure 6 and commented upon on lines 294-296. The difference in oxygenation and slope of the lower oxycline between the recent sedimentary and modern observational records is striking. Could this be elaborated upon? Is this indicative of very recent increases in oxygenation of deep-intermediate waters? Or something else? The difference between LH and modern oxygenation may also raise some skepticism around how reliable modern  $[O_2]_{BW}$  measurements may be for calibrating “recent” coretop material, which should be addressed.

**Reply:** We thank the reviewer for the detailed and positive feedback and the very constructive suggestions. We corrected and updated our manuscript accordingly and below we give a point by point response to the minor requests and editorial suggestions of the reviewer. We also slightly extended the discussion regarding the deep oxycline, which is obviously steeper in the modern observation than in the paleo reconstruction for the late LH as shown in figure 6. Regarding the scepticism “around how reliable modern  $[O_2]_{BW}$  measurements may be for calibrating “recent” coretop material”: the paleoreconstructions for the deep oxycline (~900-1500 mbss) were done using transfer functions from foraminiferal assemblage compositions (Erdem et al., 2020). These have been calibrated, using the composition of living (rose Bengal) stained foraminiferal assemblages that were alive during sampling time and not just “recent” core top material. In the Erdem et al. (2020) paper, it has already been noted that the reconstructed  $[O_2]_{BW}$  values might be biased to lower values, since most of the reference samples that have been used for calibration were from low  $[O_2]$  locations. The flattened lower oxycline during the LH in Fig. 6 might thus be an artefact of the comparison of different paleo proxies. There still might be the possibility is that there has been a recent increase in oxygenation of deep to intermediate waters, which is also given credit to in the revised text of the manuscript. We added the following part:

“A comparison of the available quantitative  $[O_2]$  paleo data with modern conditions indicates that the oxycline below the OMZ is steeper today than during the LGM or the LH. This might indicate that the intermediate to deep water masses at the Peruvian Margin have been ventilated very recently. The  $[O_2]_{BW}$  below 800 mbss are based on foraminiferal assemblages<sup>14</sup>. In the original study it is discussed that the reconstructed  $[O_2]_{BW}$  might be biased to lower values, because the majority of reference surface samples used for the calibration were from shallower locations (e.g. lower  $[O_2]_{BW}$

than the stations, used for the paleoreconstructions). Thus, we cannot exclude that the flattened lower oxycline during the LH might be an artefact, related to results of multiple [O<sub>2</sub>] paleo proxies being compiled in fig. 6.”

Also, the modern short time [O<sub>2</sub>] variability at our downcore station for the PD reconstruction is high and concentrations sometimes exceed the whole [O<sub>2</sub>]<sub>BW</sub> paleorecord, which already has been mentioned in the first version of our manuscript. This is now much further discussed, also including suggestions by reviewer 2. It might be that *P. limbata* always adapt to the lowest [O<sub>2</sub>]<sub>BW</sub> they experience or to the environmental conditions during their embryonic state in general as suggested by Belanger (2022). This is discussed now in detail in the second last paragraph of the discussion in the revised manuscript (see response to Reviewer 2 below).

Below you can find our response to the minor points of revision.

**R1:** Other comments are as below:

15: “a proxy”

**Reply:** done

**R1:** 27: no “the”

**Reply:** done

**R1:** 30: no “the”

**Reply:** done

**R1:** 37: Given the importance of deeper water masses to this story, could intermediate water hydrography be added here as well?

**Reply:** We added a brief section to summarize the intermediate water hydrography in this region:

“The Chile-Peru Deep Coastal Current prevails at ~500 m water depth near the coast and transports relatively low-saline and cold Antarctic Intermediate Water northwards<sup>11</sup>. Depending on the latitude this current concurs with the Peru-Chile undercurrent that is dominant ~500 m between 16°S and 17°S<sup>11</sup>. At greater depths, the Antarctic Intermediate Water competes with North Pacific Intermediate Water, which results in different mixing flavours around Eastern Equatorial North and South Pacific<sup>12</sup>.”

**R1:** 55-57: This requires a reference

**Reply:** Since we cannot ultimately prove this statement with data from the literature, we rephrased this sentence to tone it down and added a reference: “Epifaunal *Cibicides* spp. seem to require O<sub>2</sub> for aerobic respiration, since they increase their porosity under O<sub>2</sub> depletion to optimize the uptake of O<sub>2</sub><sup>15</sup>.”

**R1:** 60: to -> too

**Reply:** In this case we disagree. “...able to denitrify...” should be right and not “...able too denitrify...”

**R1:** 63-64: “had been assumed that”

**Reply:** done

**R1:** 66-68: “depend” doesn’t seem quite the right word given this is just the observation of individuals at higher O<sub>2</sub>. Could this be rephrased?

**Reply:** rephrased to “seem to prefer O<sub>2</sub> respiration”

**R1:** 68: Is there any information available on the ecology on limbate for comparison?

**Reply:** We are not aware of any literature data about the ecology of *P. limbata* even after a thorough recherche. The species is not mentioned by Stace Beaulieu in his work on the colonisation of glass sponge stalks in the abyssal NE Pacific. It is recorded as being there in the Marine Life of Costa Rica checklists and it has been reported to occur at the coast of both Americas (<https://eol.org/pages/6993703>). The preference of the sister species *Planulina ariminensis* to elevated substrates has been mentioned in our manuscript already. Even though affiliation to a certain genus is not a guarantee that all species of that genus pursue the same mode of life, most of them do, as shown by species of the closely related genera *Hanzawaia* and *Cibicides*.

**R1:** 69: remove comma

**Reply:** done

**R1:** 70: as well -> also AND remove comma

**Reply:** done

**R1:** 71: at -> in

**Reply:** rephrased to "from"

**R1:** 75: remove comma

**Reply:** done

**R1:** 76: What is the rationale behind developing a local calibration? If the relationship between PD and O2 is highly spatially variable, would this relationship not also be expected to vary through time?

**Reply:** The reviewer makes a good point here. Though, we think that a local calibration might still be more accurate compared to a global calibration that statistically shows a wider spread. Another advantage of our new calibration might be that it is species specific which also minimizes vital effects of the different species. Thus we rephrased the sentence to "...our new local and species-specific calibration...". Regarding a variation through time, we respectfully disagree. The pore density is a matter of chemical processes related with the cell physiology, and it has been evolved millions of years ago (Woehle et al., 2022). *Planulina* species showed long ranges in the geological record (Jones, 1994) and no morphological, evolutionary variations that could be used for biostratigraphic adaptations. As such, the above mentioned relationship is regarded as being stable through time, at least since the Pliocene (Kucera and Schönfeld, 2007).

**R1:** 86: "samples contained"

**Reply:** done

**R1:** 87: "model for core"

**Reply:** done

**R1:** 86 & 89 & throughout: check for consistency in "planktic" and "planktonic"

**Reply:** We stayed with "planktic" and removed one "planktonic"

**R1:** 224: Is it so destructive that shells could not be used even for geochemical analyses?

**Reply:** The tests are likely still usable for some other analyses. The sentence has therefore been rephrased: "Though, this method is destructive and it is not possible to archive the specimens. Also, the use of the specimens for other analyses might be limited."

**R1:** 229: "elaboration" isn't quite right. "test of"?

**Reply:** done

**R1:** 272: "concentration of preformed"

**Reply:** done

**R1:** 278: “change in”

**Reply:** done

**R1:** 307-308: Could this be elaborated upon? I am struggling to understand how this observation connects with seasonality. Is the suggestion that *limbata* are living preferentially in higher O<sub>2</sub> seasons? If so, why would this impact only part of the record? Clarification would be helpful.

**Reply:** This is indeed a peculiar observation. Seasonality in the life cycles of *P. limbata* might be one explanation for this phenomenon. For example, it could be that *P. limbata*'s reproduction is coupled to the main upwelling season, hence periods of high food availability. In this case, it would record lower O<sub>2</sub> concentrations than the annual mean. This is only a hypothesis, though, and we are in strong need of further ecological studies on the key species that we use as archives in our paleorecords. Actually, reviewer 2 came up with an excellent idea, how this data could be explained as well. We extended the discussion about this aspect in our revised manuscript accordingly:

“This might be related to seasonality in the life cycle of *P. limbata*. If the reproduction of *P. limbata* is coupled to the main upwelling season, the PD likely records the lower [O<sub>2</sub>]<sub>BW</sub> during that season. It also might be possible that foraminifera adapt their pore density to the lowest seasonal [O<sub>2</sub>] they experience. The higher O<sub>2</sub> pulses would not matter in that case, since the foraminifera are already adapted to withstand even lower [O<sub>2</sub>]. The lowest modern [O<sub>2</sub>]<sub>BW</sub>, documented close to the coring sites (M77/1-416/GC-4 and M77/1 406-MUC6) was ~1 μmol/kg, which is below the range of reconstructed [O<sub>2</sub>]<sub>BW</sub> using the PD proxy. This might indicate that the seasonally lowest [O<sub>2</sub>]<sub>BW</sub> continued to decrease during the LH. A recent study offered an alternative hypothesis: Belangers (2022) found that the adult morphology of benthic foraminifera might already be predetermined by the environmental conditions that the individual experiences during the embryonic state<sup>61</sup>. If this applies to the foraminiferal PD as well, it would corroborate that *P. limbata*'s life cycle is coupled to the main upwelling season and that the PD is consequently adapted to lower [O<sub>2</sub>]<sub>BW</sub> than the annual mean. Another explanation for the fact that the highly variable modern [O<sub>2</sub>]<sub>BW</sub> sometimes exceeds the range of our paleorecord could be an observation that bottom waters at the Peruvian shelf became more oxygenated over the last ~100 yr<sup>62</sup>. “

**R1:** Figure 5: This figure would be more legible with some of the white space between intervals removed and data expanded horizontally. I'd recommend removing ~4-15 kyr from the x axis and replacing with a clearly visible axis break. Alternately, the two intervals could be shown in adjacent panels with a shared y axis.

**Reply:** done. X-axis has been broken from 3-17 kyr BP.

#### **Reviewer #2 (Remarks to the Author):**

**R2:** The study investigates the possible use of foraminifera pore density as proxy for bottom water oxygen concentration during LGM and late Holocene in the Peruvian OMZ region. Oxygen past reconstruction is crucial in the current context of global oceanic deoxygenation. The authors compare different methodologies to measure the pore density on the shell of foraminifera specimens using an optic microscope. Then, they calibrate modern bottom water oxygen concentrations with pore density of modern specimens from different locations along an oxygen concentration gradient. Using long sediment records on which age models were determined, the authors reconstruct the past bottom water oxygen concentrations using pore density of foraminifera shell following the former calibration. Results are coherent with other studies investigating past oxygen concentrations in the bottom water in this region (but at other periods), arguing for a decrease in oxygenation between LGM and late Holocene. Authors then explore the reasons for this decrease, contrasting with other oceanic regions.



I found the manuscript clear, straightforward, and well written. I think that data acquisition and statistical treatment procedures are suited for the purpose of the study, and that the study is a significant advancement in the field of past oxygen concentrations reconstruction. This work will be of interest for the community interested in foraminifera and their use as proxy, but also to all researchers interested in past climate reconstruction. For these reasons, I think this work is worth publishing in Communications Earth & Environment.

**Reply:** We thank the reviewer for this very detailed and constructive review and appreciate the positive feedback on our manuscript. We are especially grateful about the suggestions regarding the discussion about the variability of modern [O<sub>2</sub>]BW and the possibility that *P. limbata* might adapt its pore density to the lowest oxygen concentrations it experiences and not to elevated concentrations during certain seasons. We included these ideas into our discussion.

**R2:** I have few comments and suggestions about the study, listed in detail below and also in the pdf file attached. Briefly, I suggest moving the first part of the section line 142 (“Downcore [O<sub>2</sub>]BW reconstruction using the pore density epifaunal *P. limbata*”) to the method section.

**Reply:** The reviewer is completely right that the description of the propagation of uncertainty is purely methodological. We therefore moved the part 145-159 to a new chapter in the methods section. The rest of this paragraph already presents some results. So we decided to keep lines 143-145 and 160-166 in the results section.

**R2:** I also suggest few ideas, but I let the author choose if it might be interesting or not to discuss it in their manuscript, especially about two things that could impact the proxy used:

- Shell thickness, which is greater in oldest chambers (if I am right?), hampering passive oxygen diffusion through pores. This questions the efficiency of oxygen uptake in the oldest chambers compared to the newest ones, and the benefit to include these chambers in the calculus of PD (for proxy purpose). Exclusion of the youngest chambers (done in method #4 if total area was higher than 700 000  $\mu\text{m}^2$ ) that are usually the biggest ones and showing the highest porosity. Since they seem should play a major role in oxygen uptake, building a proxy ignoring them is questionable. On the other hand, I understand why the authors proceed this way: significant ontogenetic effect might be problematic in the calibration and further use of such proxy.

**Reply:** The reviewer made a good point. Though, even if diffusion might be hampered by the increasing wall thickness of the older chambers, pores often show a larger diameter in the older parts of the test, which again might improve diffusion. Also, it has to be considered that the old parts of the test were once young. We agree that using the ultimate chamber might record the latest oxygen concentration that the individual experienced during its ontogenesis. Contrastingly, using a normalized part of the older part of the test most likely records the average concentrations during most of the individuals lifetime. In our opinion it is necessary to focus on a normalized part of the older test to minimize ontogenetic effects. If the analyses would focus on the ultimate or penultimate chambers, it would be also possible to minimize ontogenetic effects by just using individuals of the same size only. This might not be feasible, since the number of individuals is limited in a given sample. We also would like to address the new study of Belangers (2022). The results suggest that the final morphology of a foraminiferal test is predetermined by the first environmental conditions it experienced during the embryonic state. If this is true, the pore density (even in the ultimate chamber) would record the first and not the last oxygen concentration that the individual experienced. We included this aspect into the discussion of our manuscript (see above in the answer to reviewer #1)

**R2:** The idea that foraminifera PD (and by extension porosity) tracks the lowest oxygen concentrations in the bottom water allowing individuals to survive instead of an “averaged” [O<sub>2</sub>]BW. This would argue in favour of the fact that bottom water oxygen concentrations at the Peruvian shelf have continued to decrease until today. However, this process might only be accurate if youngest chambers (the ones that theoretically represent the compromise between improving oxygen uptake

by increasing porosity and assuring mechanic integrity of the shell by limiting porosity increase) are considered in the proxy calibration.

*Reply:* The idea that the pore density is adapted to the lowest O<sub>2</sub> concentrations that the specimen experiences is very interesting and we added this into our discussion. It is now discussed together with the Belangers (2022) results, which we mentioned above.

**R2:** I would like to inform the editor that I am not comfortable with the age model determination since it is out of my field of expertise. For this reason, I cannot fully assess the quality of this part in the manuscript.

I recommend minor revisions for this manuscript since my suggestions and comments are not going against the interpretations of results and the conclusions of the study.

Because it is not double anonymised, I require my name to be attached to this review.

Julien Richirt

Comments and suggestions

Abstract

Line 16: “mbss” or “mbs” later in the manuscript on line 144, 250, 253, 254, 256, and Figure 1 caption line 550 & 646. Please if you mean something different precise it or homogenise the spelling.

*Reply:* We changed everything to “mbss”, done.

**R2:** Introduction

Lines 54-55: “species-specific” or “species specific”. Homogenise in the manuscript if needed. I think you mean that the responses of foraminifera to different environmental factors are species-specific. I am not sure you can say that environmental factors are species-specific. Reformulate please.

*Reply:* We changed to “species specific” along the manuscript and rephrased the sentence to “In addition, the factors that influence the porosity of benthic foraminifera also appear to vary between different species.”

**R2:** Lines 57-58: Please be more specific about what pore characteristic *B. spissa* adapt to nitrate concentrations.

*Reply:* done. Changed to “pore density”.

**R2:** Line 69: Please change “porosity” for “pore density” on line 69. If I understood correctly you test for pore density (PD, pore number per unit of surface) in your study, and not porosity (area covered occupied by pores in %) since you state line 181-183: “This is a good option for high resolution SEM images but our study is based on light micrographs that do not have a resolution allowing to accurately determine the pore area. Thus, we focused on the PD instead”. Please change accordingly through the manuscript, since depending on the species, pore density and porosity might be negatively correlated.

*Reply:* done

**R2:** Methods

Lines 336-338: Is there a specific reason why you used this mesh size to sieve? How did you check that the specimens you used for the modern calibration (only the top layer of the small cores) were alive when you picked them and not dead or transported from elsewhere?

*Reply:* This is a problem indeed for species that live on elevated substrates such as stones or worm tubes. *Planulina limbata* is found in the Peruvian OMZ only at water depths between ~450 and 1000 mbss. Sessile megafauna and larger phosphorite nodules start to appear at these depths. We did several studies on living foraminiferal faunas in the Peruvian OMZ (Mallon et al., 2012; Erdem et al. 2020). We did not find any living (rose Bengal stained) specimens of *P. limbata* in our samples

although dead, empty tests are very frequent. The only living specimen of *P. limbata* that I saw by myself was attached to a phosphorite nodule with a diameter of ~ 5 cm.

It is the same with *Cibicides* species. I recently took samples from the Mid Atlantic Ridge and living *Cibicides* were very rare, except in a sample where they were attached to a sessile, 5-cm large xenophyophore. Rathburn et al. (2018) found living *Cibicides* spp. for their calibration but those were also mainly attached to elevated substrates (stones). We cannot be sure whether the specimens we used for our calibration were not redeposited at all. However, we used only the most pristine individuals we found. In addition, we used up to 10 specimens per sample to minimize the influence of individual specimens that might have been transported.

**R2:** Lines 364-366: “Due to the low number of specimens in the depths 5.5 cm, 7 cm and 9 cm, we decided to pool the specimens to one datapoint in fig. 5.” What calibrated age did you choose for these specimens, an average of the 3 samples? Please specify in the text.

**Reply:** We used the average depth of these samples to calculate the age (7.6 cm). Added the following sentence “The average depth (7.6 cm) was used to calculate the age of this data point.”

**R2:** Results

I consider that lines 143-166 are rather method description than results. Consequently, this part should be moved to the Methods section.

**Reply:** The reviewer is completely right that the description of the propagation of uncertainty is purely methodologic. We therefore moved the part 149-159 to a new chapter in the methods section. The rest of this paragraph already presents some results. So we decided to keep 143-148 and 160-166 in the results section.

**R2:** Lines 138-141: You state “In addition, the variability of the PD after method #1 was very high at station M77/1-459/MUC-25, which had the highest [O<sub>2</sub>]BW and the uncertainties of the regressions are also relatively high (Fig. 4C).” For station M77/1-459/MUC-25, you measured 2 specimens only, which is too few to describe variability or uncertainty for a regression in my opinion. I suggest removing this statement since the highest correlation (coupled with its significance) for method #4 using all specimens from all stations is convincing enough that this is the method to use in your case.

**Reply:** We removed the respective sentence.

**R2:** Lines 145-147: You state “Since method #4 showed the best correlation between PD and [O<sub>2</sub>]BW, we mainly used this method for the downcore reconstructions.” Later in the manuscript you state on lines 379-380 “All four methods have been applied to the core top samples and only method #4 was used for the downcore PD analyses in M77/1 416-GC4 and M77/1 406-MUC6.” Please precise if you mainly or only used the method #4 for downcore reconstructions.

**Reply:** We specified this accordingly: “All four methods have been applied to the core top samples and mainly method #4 was used for the downcore PD analyses in M77/1 416-GC4 and M77/1 406-MUC6. Only for one downcore data point we used method #3, since the specimens were too small for the size normalization (see tab. 4).”

**R2:** Line 168: If this is equivalent to a Welch’s T test, then change “heteroscedastic Student’s T-test” by “Welch’s T-test”.

**Reply:** indeed that’s the same test. We changed it to “Welch’s T-test”

**R2:** Discussion

Line 236: Change “porosity” by “pore density” please.

**Reply:** We are not really sure, which sentence the reviewer is referring to, since “porosity” was not mentioned in line 236.

**R2:** Lines 268-270: I have difficulties to understand this sentence. Is it the lower Fe burial that is due to a decrease in sediment deposition and increased erosion? Please rephrase more clearly.

**Reply:** we understand that the phrasing was somehow confusing. We deleted "... the lower Fe burial..." for clarification.

**R2:** Lines 266-267: unclear: is oxygen concentrations higher in intermediate water masses?

**Reply:** OMZs typically develop in areas where nutrient rich shallow to intermediate waters are upwelled. This fuels primary productivity and remineralisation of the exported organic matter draws down the oxygen at depth. The source waters for this are typically formed at high latitudes (for example Antarctic Intermediate Water in the Southern Ocean). Those are typically a higher in [O<sub>2</sub>], since they are relatively young water masses. This might be too detailed for the discussion of the paper and, thus, we would only like to refer to references in this sentence.

**R2:** Lines 271-272: "pre-formed" or "preformed", homogenise spelling.

**Reply:** done

**R2:** Lines 307-308: "This might be related to seasonality in the life cycle of *P. limbata*." In what way? Could it be also related to a possible different respiration pathway in this species? Below a certain oxygen concentration, the species might shift to alternative electron acceptor (nitrate for example?). Additionally, could oxygen uptake through pseudopods occur when they are extruded? Could this represent an active and easy way for foraminifera to finely adjust their ability to uptake oxygen.

**Reply:** We refer to our answer to reviewer 1 who also gave a similar comment (see above).

Regarding the comment for alternative respiration pathways we added the following sentence into our revised manuscript: "We cannot exclude, though, that *P. limbata* as well as other *Planulina* and *Cibicides spp.* might be able to switch to denitrification under severe O<sub>2</sub> depletion. Several *Cibicides spp.* cluster in the phylogenetic tree close to foraminiferal species that are known to denitrify<sup>30</sup>."

Regarding the comment with the pseudopodia: There are earlier observations showing mitochondria in the pseudopodia of some species. The idea Reviewer 2 mentioned therefore may be right. I would like to mention here some observations I made on denitrifying bolivinids: They often have "pore plates" covering the pores in the younger chambers. In the old chambers the pore plates are perforated. I would hypothesize that they might fill their demand for nitrate in the young chambers mainly through seawater vacuolization, while they take up nitrate through the pores in the older chambers. Could it be that this is similar for *P. limbata*? They take up O<sub>2</sub> via pseudopodial network for the younger part of their tests, while they sustain the cytoplasm in the older parts of the test through the pores? This is just a hypothesis and we definitely need more studies related to this topic!

**R2:** Lines 308-310: "Another explanation for this phenomenon could be an observation that bottom waters at the Peruvian shelf became more oxygenated over the last ~100 yr."

Alternatively:

- If we assume that PD is related to oxygen content with a negative correlation.
- Increasing PD is assumed to be an adaptation to better cope with low oxygen concentration. This means that foraminifera adapt their PD regarding the lowest oxygen concentrations they have to cope with (why would they increase PD further if not needed?).
- This implies that PD might be correlated with the lowest oxygen concentrations specimens are exposed to, instead of an average oxygen concentration value (kind of threshold effect, below this value of oxygen concentration the foraminifera cannot cope, above -during pulses- it can survive).
- The modern lowest oxygen concentrations recorded are about 1 μmol/kg in the region. This value is below the oxygen concentration values indicated by the proxy using foraminiferal PD. This would argue for a continuous decrease of the lowest oxygen concentrations occurring in the region during LH.

**Reply:** We thank the reviewer for this idea and added this hypothesis to our discussion! Reviewer 1 also commented about this, so we extended the text in the discussion about this part in our revised manuscript (see above).

**R2:** References

Line 445: correct ref. 28

**Reply:** done

**R2:** Figures & Tables

Line 574, 583 and 623: I was confused by the use of SEM acronym for 2 different things (Standard Error of the Mean and Scanning Electron Microscope lines 181, 345 and 347). I suggest changing one of the 2 acronyms to avoid confusion for the reader.

**Reply:** Since we did not use SEM so often for scanning electron microscope, we avoided to abbreviate this.

**R2:** Figure 1: I suspect the black square in the top right panel to be a little shifted north compared to the biggest map panel

**Reply:** Yes, the reviewer is right. The black box accidentally shifted slightly. This is now corrected.

**R2:** Figure 5: in the caption you state "Since only two specimens were found in one sample each individual reconstructed  $[O_2]_{BW}$  instead of mean values were plotted as grey crosses." It is unclear, which sample?

**Reply:** Added into brackets ("4.5 cm")

**R2:** On the figure itself: I suggest making a discontinuous x axis by removing the period between 4 and 14 kyr BP. It would make the data easier to read and avoid a figure where 70% is blank. Alternatively, I understand that the authors made the choice to keep continuous x axis to keep time scale coherent for the reader.

**Reply:** We added an axis break from 3 to 17 kyr BP (see above).

### **Reviewer #3 (Remarks to the Author):**

**R3:** Glock et al evaluate and expand upon the foraminiferal pore-density oxygenation proxy and apply it back in time to a core collected from the Peruvian margin. It can often be difficult to unravel the effects of productivity and oxygenation on our traditional oxygenation proxies, yet records of oxygenation can give us key insight on past changes in deep-ocean respired carbon storage and shallow-ocean OMZ expansion. However, we tend to have few studies that actually take the time to evaluate and improve upon our methods in a clear and practical way as was done in this study. This study is a great introduction to the pore-density proxy that will be of immense value to others who would like to apply this proxy to their own research areas.

**Reply:** We thank the reviewer for the positive feedback. When writing this paper, we were hesitant to combine a strongly methodological paper with a paleoceanographic results and a detailed paleoceanographic discussion. We are pleased to hear that all reviewers appreciated this approach.

**R3:** I have no major issues with the methods or results in this study, but I think it could use some revision for clarity and some expanded discussion. As I was reading, it felt like I sometimes had to go back and forth to different sections in the paper because parts of one idea were split across sections resulting in things being repeated in some spots and left out of others. It would help to bring these ideas together in one place. Specifically, I noticed this when it came to an explanation of the different pore density methods. The methods are described in the results, the discussion, and again in the methods section. It would clarify things if you bring these different pieces together in one section focused on describing in detail the four different methods. I think this portion of the paper is

extremely valuable, and if we want to get more people to try out these methods and apply this proxy then you want to make it as easy to follow as possible.

Here's my suggestion for reorganizing the PD methods (take it or leave it). Before the section you have comparing the four different methods add a section describing the four pore density methods in detail (include figure 3), the pros and cons of each method, how to do the method, the practicalities etc. Move the methodological recommendations you have later in the paper up to this section. You could also add an additional summary chart of the pros and cons of each method, that would be a great way to reinforce the info quickly and clearly. I also think your current description of methodological recommendations can probably be edited down a bit, it starts to get a bit verbose in some spots. This might be a great section to take advantage of things like bullet points or numbering or charts to show the information more clearly.

**Reply:** We completely understand this point of critique, which might actually be related to the fact, that we combined the methodological paper directly with the application of the method. Otherwise the sections would be closer to each other. We followed the suggestion of the reviewer and moved the whole part that described the four approaches to determine the pore density from the methods section at the end of the manuscript before the section that describes the results of the different approaches. We then deleted some redundancies in the part that described the results. We hope that the editor appreciates this change, although now a significant methodological part is presented in the results section.

Though, we hesitate to move the whole discussion about methodological recommendations also into this part of the paper. This would be different, if the paper would be organized with a combined "results and discussion" section. As it is at the moment, this part would dominate the whole paper and take weight and value from the other results of our study.

**R3:** I really enjoyed reading your core stratigraphy section. You were working with very challenging core material but did a great job breaking down each of the challenges you faced and explaining how you tackled those challenges and the caveats that come with dealing with imperfect core material. One small thought about your stratigraphic methods- Could you use the reservoir ages from the Peru-Chile transect of Martínez-Fontaine et al. (2019) rather than Bova et al? Or are they perhaps less suitable? Either way this is nothing that would affect your results, I was just curious why you chose the reservoir ages that you chose. I found this section to be very well researched and explained.

**Reply:** Yes, it was challenging only to find benthic foraminifera in our samples and even being forced to use sedimentary organic matter for radiocarbon datings. The only reason why we have chosen the core from Bova et al. for comparison was the fact that this was the only one with published benthic-planktic offsets from our study area off Peru. We are aware, though, that their core was taken at greater depth and further north. The Martínez-Fontaine et al. cores would have been an alternative but they are located off Chile and even further away from our study sites.

**R3:** The downcore O<sub>2</sub> reconstruction section seems to be a mix of methods and results, it might be worth splitting these up a bit.

**Reply:** This was already addressed by reviewer 2. We moved the whole part about the error propagation into the methods section (see above).

**R3:** The section on deoxygenation reads a bit like a results section with some added literature review, but I would have liked to see more discussion in this section. The other sections have proven your expertise, so when I got to this section I was eager to hear more about why these results are interesting and important. Expand upon the big-picture implications of a well oxygenated glacial eastern tropical Pacific.

**Reply:** We agree that it is important to expand upon a bigger picture and we added a paragraph

where we discussed the implications of a well oxygenated, glacial Eastern Tropical Pacific as follows. Actually, we turned the discussion around to “the implications of ocean deoxygenation from the cold Glacial to the warm LH:

“The observation that the Peruvian OMZ was more oxygenated during the LGM in comparison to the Holocene and modern conditions (Fig. 6) is in line with recent observations of on-going ocean deoxygenation and OMZ expansion related to global warming<sup>1,2</sup>. The Peruvian OMZ is at present in a highly productive state the abundance of anchovies actually increased over the past ~1 kyr, following the trend for other proxies for subsurface ocean deoxygenation<sup>16</sup> and our own data (fig. 5). The optimum in anchovy production off Peru during the modern warm period is related to the enhanced nutrient supply that increases primary productivity and the related preferential development of large plankton<sup>16</sup>. Although the current warm period seems to be favourable for the Peruvian anchovy population and the related commercial fishery, some periods during the LH that are characterized by a very intense OMZ are disadvantageous for anchovy populations<sup>16</sup>. Indeed, there is evidence that smaller goby like fish species dominated the Peruvian upwelling region in a very warm and severely O<sub>2</sub> depleted phase during the Eemian<sup>63</sup>. Ocean deoxygenation will likely continue under the current trend of global warming and indeed anchovy biomass steadily decreased again during the past decades<sup>2,63</sup>. Thus, there is a high risk that the ecosystem at the Peruvian upwelling region reaches a tipping point for the fish community. This might potentially result in jellyfish outbreaks leading to a trophic dead end, as observed in other ecosystems where fisheries have collapsed, such as the Benguela Upwelling<sup>64</sup>. Our results indicate deoxygenation at the Peruvian OMZ from the cold LGM to the warm LH, and the current warm period and thus provide further evidence for concerns related to the foreseeable future ocean deoxygenation.”

In addition, we added a sentence that addresses the implications that the Peruvian OMZ did not vertically shift, such as the OMZ in the Eastern Equatorial Pacific:

“We found no evidence for a severe vertical shift of the Peruvian OMZ over the last deglaciation which might have connected intermediate to deep reservoirs of old carbon to the atmosphere as it has been observed for the Eastern Equatorial Pacific<sup>55</sup>.”

**R3:** Methods: How many forams do you use for each sample? What is a good representative number?

**Reply:** We added the following sentence to the methods: “We used 10 – 12 specimens for the core top PD vs. [O<sub>2</sub>]<sub>BW</sub> calibrations except in core M77/1-459/MUC-25, where only two well-preserved specimens of *P. limbata* were available. For the downcore PD record, we used an average of five *P. limbata* specimens.”

**R3:** Table 1: It was a bit hard to tell which names were italicized. Maybe draw a line between the coretops and long cores?

**Reply:** done

**R3:** Tables 2-4 could maybe be shifted to supplemental information.

**Reply:** We respectfully disagree. Data transparency is a major concern and presenting the tables in the main text makes them much better visible and easier accessible. The readers would not have to switch between supplements and main text to find the relevant data. Thus, we would prefer to keep the tables in the main text.

**R3:** Figure 1: Add the location of the bova core to the inset map

**Reply:** done

**R3:** Figure 2: It might be worth expanding the x-axis on the top figure to match the bottom figure.

The error initially looks a bit alarming compared to the lower figure, but it's just a function of the axes.

**Reply:** done

**R3:** Figure 4: Add the species to the legend in A.

**Reply:** We added the species name into the figure caption and specified that the data of Rathburn et al. is from mixed epibenthic species.

**R3:** Add labels to the photographs in B to indicate the high and low PD specimens.

**Reply:** We specified in the figure caption that the left specimen has the high porosity and the right specimen has the low porosity.

**R3:** Shouldn't oxygen go on the x-axis because it's the independent variable? Also, why is the error on the >12  $\mu\text{mol}/\text{kg}$  method 1 PD so high?

**Reply:** We decided to show the pore density on the x-axis because like this we can show the equation of the correlation with oxygen as the dependent variable. Then, oxygen can easily be calculated from the pore density for paleo-reconstructions without the need to transform the equation. The >12  $\mu\text{mol}/\text{kg}$  PD error for method 1 is so high, because the pore density in the ultimate chamber of the specimens in this sample was very different between the individuals.

References added by Joachim

Jones, R.W., 1994. The Challenger Foraminifera. The Natural History Museum. Oxford University Press, London.

Kucera, M., Schönfeld, J., 2007. The origin of modern oceanic foraminiferal fauna and Neogene climate change. In: Williams, M., Haywood, A.M., Gregory, J., Schmidt, D.N. (eds.), Deep-Time Perspectives on Climate Change: Marrying the Signal from Computer Models and Biological Proxies. The Micropalaeontology Society Special Publications. The Geological Society, London, 409-425.

Woehle, C. Roy, A.S., Glock, N., Michels, J., Wein, T., Weissenbach, J., Romero, D., Hiebenthal, C., Gorb, S.N., Schönfeld, J., Dagan, T., 2022. Denitrification in foraminifera has ancient origins and is complemented by associated bacteria. PNAS, 119, No. 25, e2200198119, 11 pp., doi: 10.1073/pnas.2200198119.



14th Oct 22

Dear Dr Glock,

Your manuscript titled "Foraminiferal pore densities reveal similar but weaker Peruvian oxygen minimum zone during Last Glacial Maximum" has now been seen by our reviewers, whose comments appear below. In light of their advice I am delighted to say that we are happy, in principle, to publish a suitably revised version in Communications Earth & Environment under the open access CC BY license (Creative Commons Attribution v4.0 International License).

We therefore invite you to revise your paper one last time to address the remaining concerns of our reviewers. At the same time we ask that you edit your manuscript to comply with our format requirements and to maximise the accessibility and therefore the impact of your work.

**Please note that it may still be possible for your paper to be published before the end of 2022, but in order to do this we will need you to address these points as quickly as possible so that we can move forward with your paper.**

#### EDITORIAL REQUESTS:

Please review our specific editorial comments and requests regarding your manuscript in the attached "Editorial Requests Table". Please outline your response to each request in the right hand column. Please upload the completed table with your manuscript files as a Related Manuscript file.

If you have any questions or concerns about any of our requests, please do not hesitate to contact me.

#### SUBMISSION INFORMATION:

In order to accept your paper, we require the files listed at the end of the Editorial Requests Table; the list of required files is also available at <https://www.nature.com/documents/commsj-file-checklist.pdf>.

#### OPEN ACCESS:

Communications Earth & Environment is a fully open access journal. Articles are made freely accessible on publication under a [CC BY license](http://creativecommons.org/licenses/by/4.0) (Creative Commons Attribution 4.0 International License). This license allows maximum dissemination and re-use of open access materials and is preferred by many research funding bodies.

For further information about article processing charges, open access funding, and advice and support from Nature Research, please visit <https://www.nature.com/commsenv/article-processing-charges>

At acceptance, you will be provided with instructions for completing this CC BY license on behalf of all authors. This grants us the necessary permissions to publish your paper. Additionally, you will be

asked to declare that all required third party permissions have been obtained, and to provide billing information in order to pay the article-processing charge (APC).

Please use the following link to submit the above items:

[link redacted]

\*\* This url links to your confidential home page and associated information about manuscripts you may have submitted or be reviewing for us. If you wish to forward this email to co-authors, please delete the link to your homepage first \*\*

We hope to hear from you within two weeks; please let us know if you need more time.

Best regards,

Alienor Lavergne, PhD  
Associate Editor  
Communications Earth & Environment

REVIEWERS' COMMENTS:

Reviewer #1 (Remarks to the Author):

Thank you for providing a thorough response to all reviewer comments. I look forward to seeing this manuscript published.

One minor comment is that on line 361 the author's name should be "Belanger" (no 's').

Reviewer #2 (Remarks to the Author):

Since the authors answered clearly to all comments and adapted the manuscript accordingly, I have no further remarks and support publication in Communications earth & environment.

Julien Richirt

Reviewer #3 (Remarks to the Author):

The authors have done a nice job addressing all of my comments. I have no further comments to add.

Below you can find the reviewers' comments to our manuscript. As you can see, there was only one minor remaining comment regarding an author name in a citation. We corrected the name in the revised manuscript. Otherwise, we followed all the editorial requests for our paper. A point by point response can be found in the editorial requests table.

REVIEWERS' COMMENTS:

Reviewer #1 (Remarks to the Author):

Thank you for providing a thorough response to all reviewer comments. I look forward to seeing this manuscript published.

One minor comment is that on line 361 the author's name should be "Belanger" (no 's').

Reviewer #2 (Remarks to the Author):

Since the authors answered clearly to all comments and adapted the manuscript accordingly, I have no further remarks and support publication in Communications earth & environment.

Julien Richirt

Reviewer #3 (Remarks to the Author):

The authors have done a nice job addressing all of my comments. I have no further comments to add.
