# Supplementary material for: The Peruvian oxygen minimum zone was similar in extent but weaker during the Last Glacial Maximum than Late Holocene
Source: Springer Nature journal article supplement (doi:10.1038/s43247-022-00635-y), 2022-12-05
Supplement: MOESM3 [file 43247_2022_635_MOESM3_ESM.pdf]

## Description of Additional Supplementary Files

**File name:** Supplementary Data 1

**Description:** Individual pore densities (PD) of *Planulina limbata* in the different core top samples. PDs after all four tested methods are listed. a:  $[O_2]_{BW}$  taken from Supplementary Reference<sup>5</sup>; b:  $[O_2]_{BW}$  taken from Supplementary Reference<sup>6</sup>.

**File name:** Supplementary Data 2

**Description:** Individual pore densities (PD) of *Planulina limbata* and calibrated ages (Cal. age) in the different samples for the downcore reconstructions. SD is the standard deviation of the cal. age. Samples in red were ignored, since they were below the hiatus at 10 cm depth in the sediment core and not from the Late Holocene.
