# Supplementary material for: The Peruvian oxygen minimum zone was similar in extent but weaker during the Last Glacial Maximum than Late Holocene
Source: Springer Nature journal article supplement (doi:10.1038/s43247-022-00635-y), 2022-12-05
Supplement: MOESM4 [file 43247_2022_635_MOESM4_ESM.xlsx]

## Sheet: Supplementary Data 1
Individual pore densities (PD) of Planulina limbata in the different core top samples. PDs after all four tested methods are listed. a: [O2]BW taken from Glock et al. (Supplementary Reference 5); b: [O2]BW taken from Glock et al. (Supplementary Reference6).
	PD after method #1 (P/µm2)	PD after method #2 (P/µm2)	PD after method #3 (P/µm2)	PD after method #4 (P/µm2)	[O2]BW (µmol/kg)
M77/1-553/MUC-54	0.0047	0.0049	0.0033	0.0033	3.00a
M77/1-553/MUC-54	0.0052	0.0044	0.0028	0.0027	3.00a
M77/1-553/MUC-54	0.007	0.0056	0.0032	0.0032	3.00a
M77/1-553/MUC-54	0.0064	0.0051	0.0036	0.0036	3.00a
M77/1-553/MUC-54	0.0058	0.0052	0.0031	0.0031	3.00a
M77/1-553/MUC-54	0.0074	0.0058	0.0035	0.0035	3.00a
M77/1-553/MUC-54	0.0064	0.0054	0.0032	0.0032	3.00a
M77/1-553/MUC-54	0.0073	0.0054	0.0032	0.0032	3.00a
M77/1-553/MUC-54	0.0062	0.0054	0.0022	0.0019	3.00a
M77/1-553/MUC-54	0.0051	0.0059	0.0026	0.0026	3.00a
M77/1-553/MUC-54	0.006	0.0055	0.0034	0.0034	3.00a
M77/1-553/MUC-54	0.0066	0.0046	0.0036	0.0036	3.00a
M77/1-487/MUC-39	0.0062	0.0051	0.0028	0.0027	3.70b
M77/1-487/MUC-39	0.0064	0.0046	0.0027	0.0027	3.70b
M77/1-487/MUC-39	0.0058	0.0048	0.0029	0.0029	3.70b
M77/1-487/MUC-39	0.006	0.0054	0.0028	0.0028	3.70b
M77/1-487/MUC-39	0.0069	0.0062	0.003	0.003	3.70b
M77/1-487/MUC-39	0.006	0.0054	0.0031	0.0031	3.70b
M77/1-487/MUC-39	0.0068	0.0047	0.0032	0.0032	3.70b
M77/1-487/MUC-39	0.0066	0.0055	0.0027	0.0027	3.70b
M77/1-487/MUC-39	0.0064	0.0064	0.0034	0.0034	3.70b
M77/1-487/MUC-39	0.0071	0.0062	0.0032	0.0032	3.70b
M77/1-487/MUC-39	0.0063	0.0059	0.0037	0.0036	3.70b
M77/2-723/MUC-47-3	0.0047	0.004	0.0018	0.0018	8.10a
M77/2-723/MUC-47-3	0.006	0.0046	0.0027	0.0027	8.10a
M77/2-723/MUC-47-3	0.0056	0.0033	0.0026	0.0026	8.10a
M77/2-723/MUC-47-3	0.005	0.004	0.0022	0.0021	8.10a
M77/2-723/MUC-47-3	0.0052	0.0042	0.0027	0.0027	8.10a
M77/2-723/MUC-47-3	0.0056	0.0039	0.0029	0.0029	8.10a
M77/2-723/MUC-47-3	0.004	0.0057	0.0025	0.0025	8.10a
M77/2-723/MUC-47-3	0.0052	0.0045	0.0024	0.0021	8.10a
M77/2-723/MUC-47-3	0.0059	0.004	0.0031	0.0031	8.10a
M77/2-723/MUC-47-3	0.006	0.0047	0.0021	0.0019	8.10a
M77/2-723/MUC-47-3	0.0052	0.004	0.0027	0.0027	8.10a
M77/1-565/MUC-60	0.0048	0.0035	0.002	0.002	8.17b
M77/1-565/MUC-60	0.0052	0.0027	0.0021	0.0021	8.17b
M77/1-565/MUC-60	0.0058	0.0035	0.002	0.002	8.17b
M77/1-565/MUC-60	0.0051	0.0029	0.0023	0.0023	8.17b
M77/1-565/MUC-60	0.005	0.0032	0.0021	0.0021	8.17b
M77/1-565/MUC-60	0.0049	0.0029	0.0019	0.0019	8.17b
M77/1-565/MUC-60	0.0051	0.0032	0.0026	0.0026	8.17b
M77/1-565/MUC-60	0.0052	0.0044	0.0019	0.0019	8.17b
M77/1-565/MUC-60	0.0051	0.0031	0.0019	0.0019	8.17b
M77/1-565/MUC-60	0.0063	0.0033	0.0026	0.0026	8.17b
M77/1-565/MUC-60	0.0055	0.0032	0.0023	0.0023	8.17b
M77/1-459/MUC-25	0.0064	0.002	0.0015	0.0015	12.55b
M77/1-459/MUC-25	0.0034	0.0022	0.0017	0.0017	12.55b
