# Supplementary material for: The Peruvian oxygen minimum zone was similar in extent but weaker during the Last Glacial Maximum than Late Holocene
Source: Springer Nature journal article supplement (doi:10.1038/s43247-022-00635-y), 2022-12-05
Supplement: MOESM5 [file 43247_2022_635_MOESM5_ESM.xlsx]

## Sheet: Supplementary Data 2
Individual pore densities (PD) of Planulina limbata and calibrated ages (Cal. age) in the different samples for the downcore reconstructions. SD is the standard deviation of the cal. age. Samples in red were ignored, since they were below the hiatus at 10 cm depth in the sediment core and not from the Late Holocene
Core name	Depth (cm)	Cal. age (yr BP)	SD	PD (P/µm2)
M77/1 406-MUC6	0.5	86	42	0.0027
M77/1 406-MUC6	0.5	86	42	0.003
M77/1 406-MUC6	0.5	86	42	0.0027
M77/1 406-MUC6	0.5	86	42	0.0024
M77/1 406-MUC6	1.5	252	90	0.0028
M77/1 406-MUC6	1.5	252	90	0.0027
M77/1 406-MUC6	1.5	252	90	0.0026
M77/1 406-MUC6	1.5	252	90	0.0025
M77/1 406-MUC6	1.5	252	90	0.0027
M77/1 406-MUC6	1.5	252	90	0.0025
M77/1 406-MUC6	2.5	361	100	0.0027
M77/1 406-MUC6	2.5	361	100	0.0026
M77/1 406-MUC6	2.5	361	100	0.0024
M77/1 406-MUC6	2.5	361	100	0.0019
M77/1 406-MUC6	3.5	461	102	0.0029
M77/1 406-MUC6	3.5	461	102	0.0031
M77/1 406-MUC6	3.5	461	102	0.0027
M77/1 406-MUC6	4.5	559	96	0.0026
M77/1 406-MUC6	4.5	559	96	0.0023
M77/1 406-MUC6	5.5	668	74	0.0023
M77/1 406-MUC6	5.5	668	74	0.0023
M77/1 406-MUC6	7	940	234	0.002
M77/1 406-MUC6	7	940	234	0.002
M77/1 406-MUC6	9	1199	425	0.0024
M77/1 406-MUC6	9	1199	425	0.0022
M77/1 406-MUC6	11	*	*	0.0018
M77/1 406-MUC6	11	*	*	0.001
M77/1 406-MUC6	11	*	*	0.0019
M77/1 406-MUC6	11	*	*	0.0015
M77/1 406-MUC6	13	*	*	0.0023
M77/1 406-MUC6	13	*	*	0.0022
M77/1 406-MUC6	13	*	*	0.002
M77/1 406-MUC6	13	*	*	0.0021
M77/1 406-MUC6	13	*	*	0.0021
M77/1 406-MUC6	13	*	*	0.002
M77/1 406-MUC6	16	*	*	0.0016
M77/1 406-MUC6	16	*	*	0.0021
M77/1 406-MUC6	16	*	*	0.0016
M77/1 406-MUC6	16	*	*	0.0019
M77/1 406-MUC6	16	*	*	0.0022
M77/1 406-MUC6	20	*	*	0.002
M77/1 406-MUC6	20	*	*	0.0017
M77/1 406-MUC6	20	*	*	0.002
M77/1 406-MUC6	20	*	*	0.0017
M77/1 406-MUC6	20	*	*	0.0016
M77/1 406-MUC6	23	*	*	0.0019
M77/1 406-MUC6	23	*	*	0.002
M77/1 406-MUC6	23	*	*	0.002
M77/1 406-MUC6	23	*	*	0.0022
M77/1 416-GC4	20	17432	203	0.0015
M77/1 416-GC4	20	17432	203	0.0021
M77/1 416-GC4	20	17432	203	0.0015
M77/1 416-GC4	20	17432	203	0.0018
M77/1 416-GC4	20	17432	203	0.0018
M77/1 416-GC4	20	17432	203	0.0018
M77/1 416-GC4	30	17721	209	0.0019
M77/1 416-GC4	30	17721	209	0.0014
M77/1 416-GC4	30	17721	209	0.0019
M77/1 416-GC4	30	17721	209	0.0015
M77/1 416-GC4	30	17721	209	0.0016
M77/1 416-GC4	40	17943	196	0.0016
M77/1 416-GC4	40	17943	196	0.0017
M77/1 416-GC4	40	17943	196	0.0014
M77/1 416-GC4	40	17943	196	0.0016
M77/1 416-GC4	40	17943	196	0.0014
M77/1 416-GC4	40	17943	196	0.0016
M77/1 416-GC4	50	18165	179	0.0015
M77/1 416-GC4	50	18165	179	0.0018
M77/1 416-GC4	50	18165	179	0.0019
M77/1 416-GC4	50	18165	179	0.0017
M77/1 416-GC4	50	18165	179	0.0015
M77/1 416-GC4	55	18288	161	0.0014
M77/1 416-GC4	55	18288	161	0.0023
M77/1 416-GC4	55	18288	161	0.0022
M77/1 416-GC4	55	18288	161	0.0019
M77/1 416-GC4	55	18288	161	0.0019
M77/1 416-GC4	65	18524	124	0.0018
M77/1 416-GC4	65	18524	124	0.0018
M77/1 416-GC4	65	18524	124	0.0016
M77/1 416-GC4	65	18524	124	0.0021
M77/1 416-GC4	65	18524	124	0.0014
M77/1 416-GC4	70	18582	120	0.0016
M77/1 416-GC4	70	18582	120	0.0015
M77/1 416-GC4	70	18582	120	0.0018
M77/1 416-GC4	70	18582	120	0.0015
M77/1 416-GC4	75	18636	116	0.0015
M77/1 416-GC4	75	18636	116	0.0017
M77/1 416-GC4	75	18636	116	0.0016
M77/1 416-GC4	75	18636	116	0.0012
M77/1 416-GC4	85	18737	108	0.0026
M77/1 416-GC4	85	18737	108	0.0026
M77/1 416-GC4	85	18737	108	0.0024
M77/1 416-GC4	85	18737	108	0.002
M77/1 416-GC4	85	18737	108	0.0028
M77/1 416-GC4	90	18792	103	0.0017
M77/1 416-GC4	90	18792	103	0.0014
M77/1 416-GC4	90	18792	103	0.0016
M77/1 416-GC4	90	18792	103	0.0022
M77/1 416-GC4	90	18792	103	0.0018
M77/1 416-GC4	100	18922	85	0.0018
M77/1 416-GC4	100	18922	85	0.0016
M77/1 416-GC4	100	18922	85	0.0018
M77/1 416-GC4	100	18922	85	0.0014
M77/1 416-GC4	100	18922	85	0.0016
M77/1 416-GC4	110	19105	104	0.0016
M77/1 416-GC4	110	19105	104	0.0019
M77/1 416-GC4	110	19105	104	0.0017
M77/1 416-GC4	110	19105	104	0.0019
M77/1 416-GC4	110	19105	104	0.0018
M77/1 416-GC4	120	19191	107	0.0019
M77/1 416-GC4	120	19191	107	0.0016
M77/1 416-GC4	120	19191	107	0.0021
M77/1 416-GC4	120	19191	107	0.0021
M77/1 416-GC4	135	19286	114	0.0017
M77/1 416-GC4	135	19286	114	0.0021
M77/1 416-GC4	135	19286	114	0.0018
M77/1 416-GC4	135	19286	114	0.0019
M77/1 416-GC4	135	19286	114	0.0019
M77/1 416-GC4	140	19318	117	0.0018
M77/1 416-GC4	140	19318	117	0.0019
M77/1 416-GC4	140	19318	117	0.0023
M77/1 416-GC4	140	19318	117	0.0018
M77/1 416-GC4	140	19318	117	0.002
M77/1 416-GC4	150	19383	123	0.0021
M77/1 416-GC4	150	19383	123	0.0016
M77/1 416-GC4	150	19383	123	0.0018
M77/1 416-GC4	150	19383	123	0.0024
M77/1 416-GC4	150	19383	123	0.0019
M77/1 416-GC4	160	19467	132	0.0019
M77/1 416-GC4	160	19467	132	0.0021
M77/1 416-GC4	160	19467	132	0.0015
M77/1 416-GC4	160	19467	132	0.0021
M77/1 416-GC4	160	19467	132	0.0017
M77/1 416-GC4	180	19625	129	0.0027
M77/1 416-GC4	180	19625	129	0.0018
M77/1 416-GC4	180	19625	129	0.0018
M77/1 416-GC4	180	19625	129	0.0018
M77/1 416-GC4	180	19625	129	0.0017
